# Supplementary material for: Iminosugars: Effects of Stereochemistry, Ring Size, and N-Substituents on Glucosidase Activities
Source: PubMed Central journal article supplement (PMC6789487; doi:10.3390/ph12030108), 2019-07-12

# **Iminosugars: effects of stereochemistry, ring size and *N*-substituents on glucosidase activities**

**Luís O. B. Zamoner, Valquiria Aragão-Leoneti and Ivone Carvalho\***

*School of Pharmaceutical Sciences of Ribeirão Preto, University of São Paulo, Av. do Café s/n, Monte Alegre, Ribeirão Preto, CEP14040-930, Brazil. \*carronal@usp.br*

## Table of contents

| Content                                                                                                | Page |
|--------------------------------------------------------------------------------------------------------|------|
| <i>N</i> -Propynyl-1,5-dideoxy-1,5-imino-L-gulitol ( <b>26a</b> )                                      | 2    |
| <i>N</i> -Propynyl-1,6-dideoxy-1,6-imino-D-mannitol ( <b>26b</b> )                                     | 6    |
| <i>N</i> -Butyl-1,5-dideoxy-1,5-imino-L-gulitol ( <b>27a</b> )                                         | 10   |
| <i>N</i> -Butyl-1,6-dideoxy-1,6-imino-D-mannitol ( <b>27b</b> )                                        | 13   |
| <i>N</i> -Hydroxyethyl-1,5-dideoxy-1,5-imino-L-gulitol ( <b>28a</b> )                                  | 16   |
| <i>N</i> -Hydroxyethyl-1,6-imino-D-mannitol ( <b>28b</b> )                                             | 19   |
| <i>N</i> -Phenethyl-1,5-dideoxy-1,5-imino-L-gulitol ( <b>29a</b> )                                     | 22   |
| <i>N</i> -Phenethyl-1,6-dideoxy-1,6-imino-D-mannitol ( <b>29b</b> )                                    | 23   |
| <i>N</i> -Propynyl-2,3,4,6-tetra- <i>O</i> -acetyl-1,5-dideoxy-1,5-imino-L-gulitol ( <b>30a</b> )      | 26   |
| <i>N</i> -Propynyl-2,3,4,6-tetra- <i>O</i> -acetyl-1,6-dideoxy-1,6-imino-D-mannitol ( <b>30b</b> )     | 29   |
| <i>N</i> -Acetoxyethyl-2,3,4,6-tetra- <i>O</i> -acetyl-1,5-dideoxy-1,5-imino-L-gulitol ( <b>31a</b> )  | 32   |
| <i>N</i> -Acetoxyethyl-2,3,4,6-tetra- <i>O</i> -acetyl-1,6-dideoxy-1,6-imino-D-mannitol ( <b>31b</b> ) | 35   |
| <i>N</i> -Propynyl-2,3,4,6-tetra- <i>O</i> -acetyl-1,5-dideoxy-1,5-imino-D-glucitol ( <b>36a</b> )     | 38   |
| <i>N</i> -Propynyl-2,3,4,6-tetra- <i>O</i> -acetyl-1,6-dideoxy-1,6-imino-L-identol ( <b>36b</b> )      | 41   |
| <i>N</i> -Butyl-2,3,4,6-tetra- <i>O</i> -acetyl-1,5-dideoxy-1,5-imino-D-glucitol ( <b>37a</b> )        | 44   |
| <i>N</i> -Butyl-2,3,4,6-tetra- <i>O</i> -acetyl-1,6-dideoxy-1,6-imino-L-identol ( <b>37b</b> )         | 47   |
| <i>N</i> -Hydroxyethyl-2,3,4,6-tetra- <i>O</i> -acetyl-1,5-dideoxy-1,5-imino-D-glucitol ( <b>38a</b> ) | 50   |
| <i>N</i> -Hydroxyethyl-2,3,4,6-tetra- <i>O</i> -acetyl-1,6-dideoxy-1,6-imino-L-identol ( <b>38b</b> )  | 53   |
| <i>N</i> -Propynyl-1,5-dideoxy-1,5-imino-D-glucitol ( <b>39a</b> )                                     | 56   |
| <i>N</i> -Propynyl-1,6-dideoxy-1,6-imino-L-identol ( <b>39b</b> )                                      | 57   |
| <i>N</i> -Butyl-1,5-dideoxy-1,5-imino-D-glucitol ( <b>40a</b> )                                        | 58   |
| <i>N</i> -Butyl-1,6-dideoxy-1,6-imino-L-identol ( <b>40b</b> )                                         | 61   |
| <i>N</i> -Hydroxyethyl-1,5-dideoxy-1,5-imino-D-glucitol ( <b>41a</b> )                                 | 64   |
| <i>N</i> -Hydroxyethyl-1,6-dideoxy-1,6-imino-L-identol ( <b>41b</b> )                                  | 67   |
| IC50 in $\alpha$ and $\beta$ -Glucosidase                                                              | 70   |
| Graphics of $\alpha$ -Glucosidase Yeast assays                                                         | 72   |
| Graphics of $\beta$ -Glucosidase Almond assays                                                         | 74   |

***N*-Propynyl-1,5-dideoxy-1,5-imino-L-gulitol (26a):**

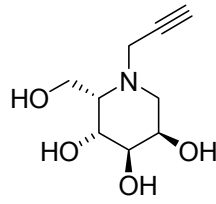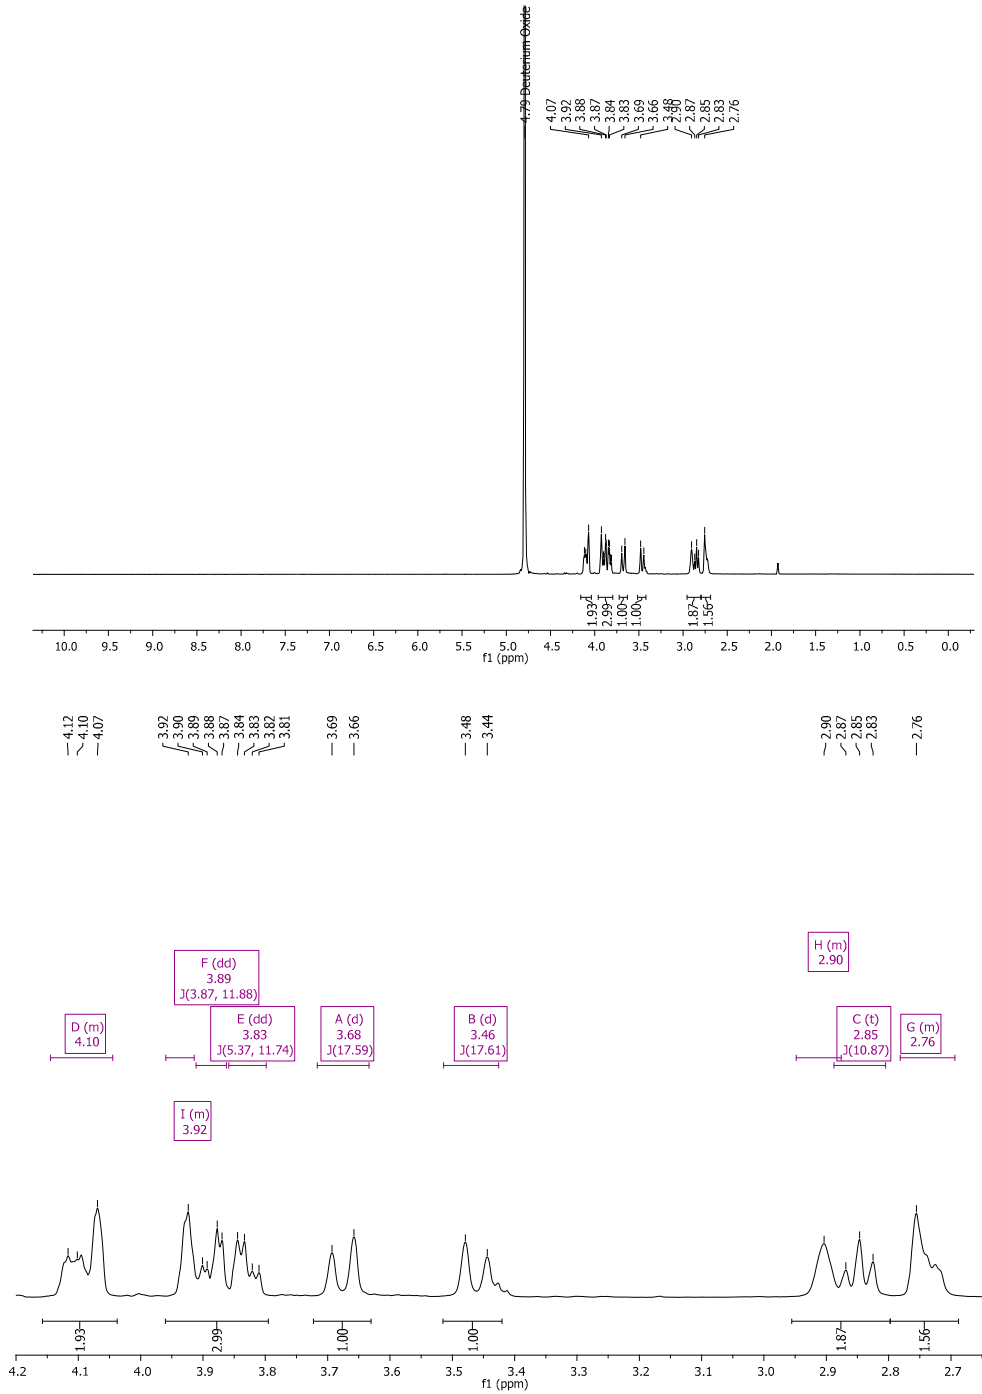

$^1\text{H}$  NMR (500 MHz,  $\text{D}_2\text{O}$ )

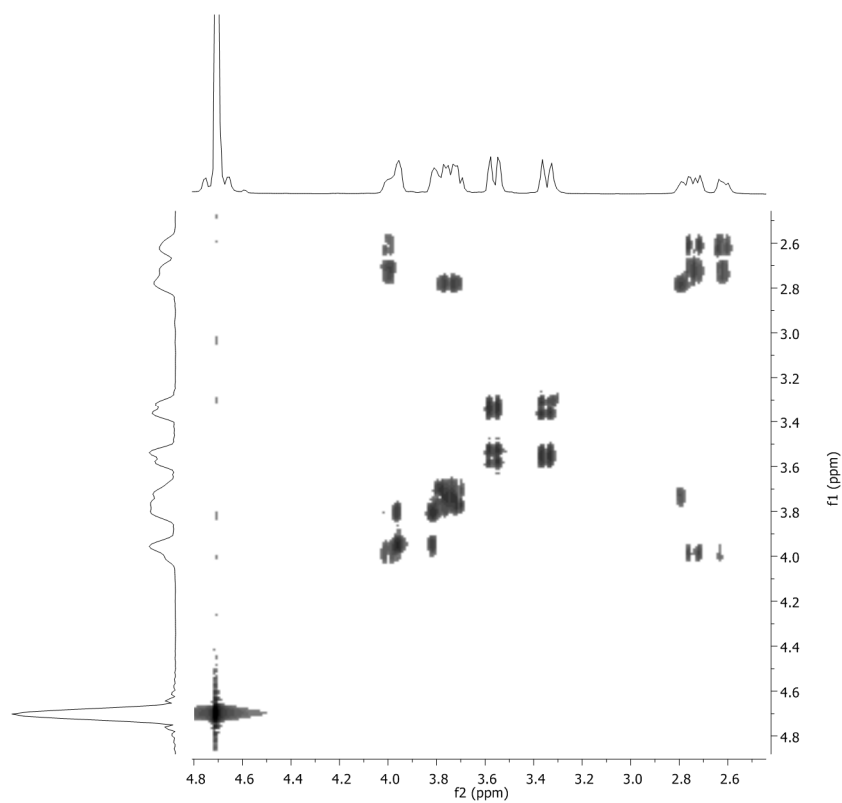

COSY NMR

70.87  
69.95  
65.33  
60.11  
57.23  
51.53  
42.54

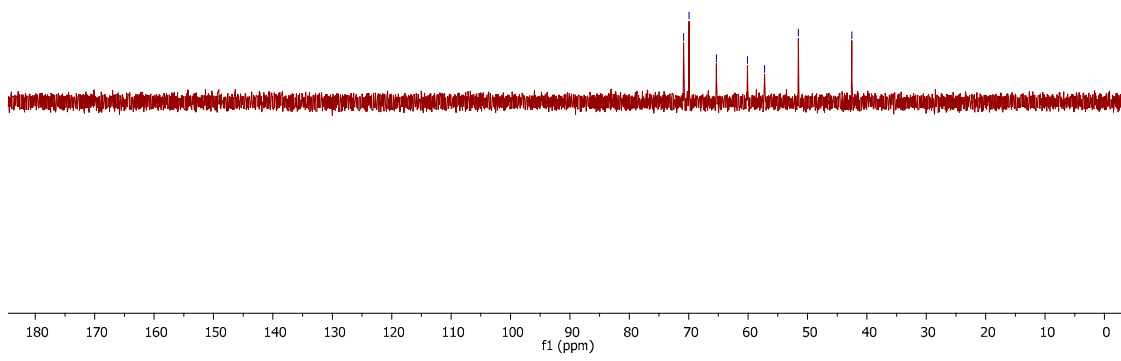

$^{13}\text{C}$  NMR (125 MHz,  $\text{D}_2\text{O}$ )

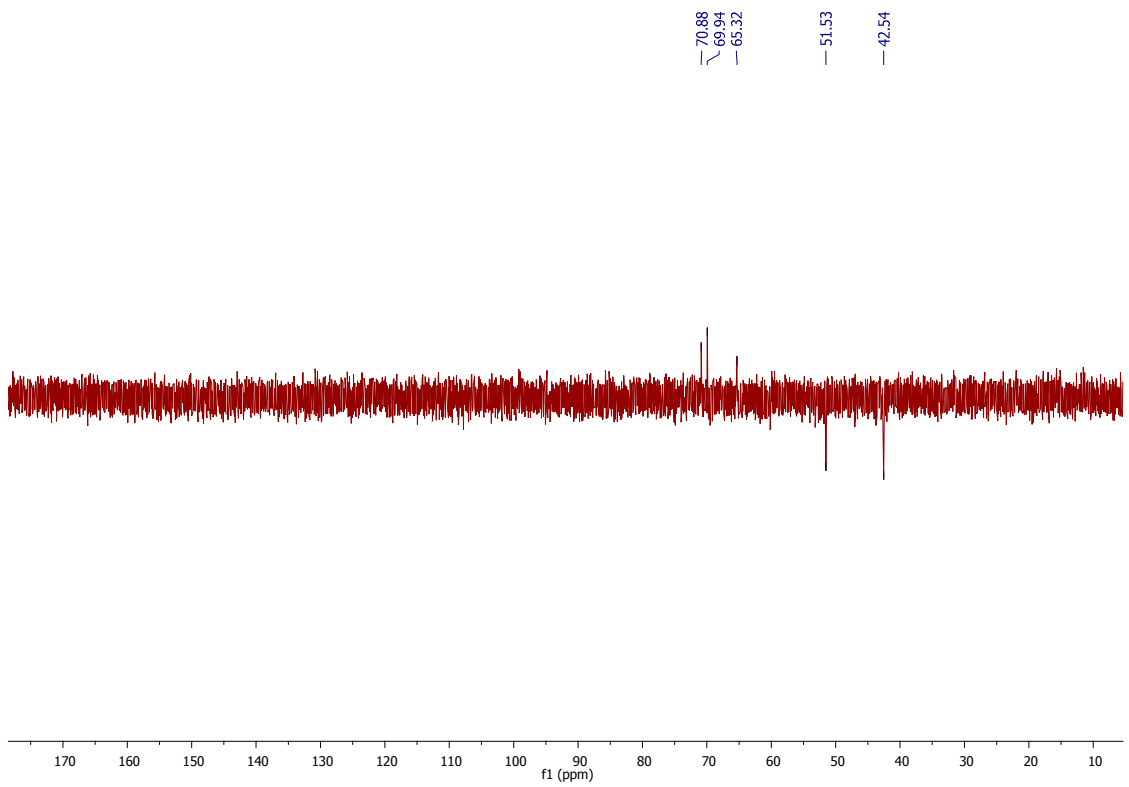

<sup>13</sup>C NMR DEPT (125 MHz, D<sub>2</sub>O)

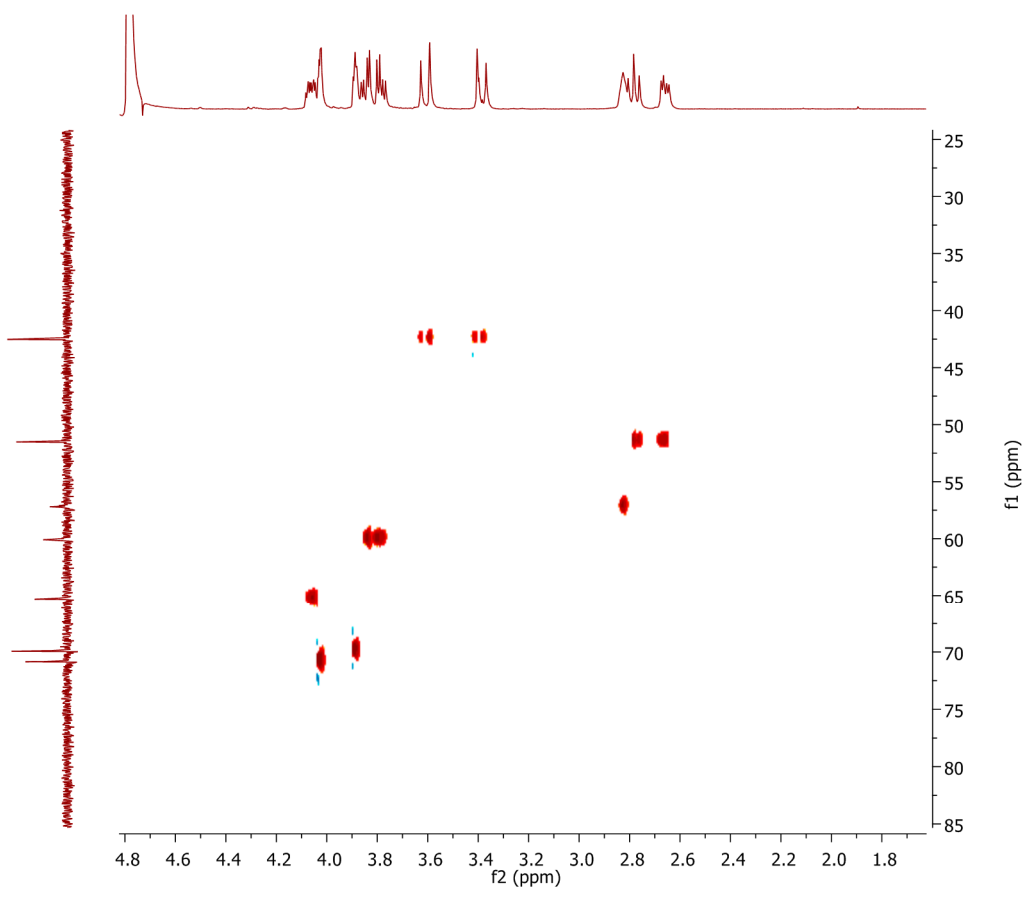

HMQC NMR

jic001995sn\_96a

jic001995sn\_96a 26 (0.804) AM2 (Ar,18000.0,0.00,0.00); Cm (3:65)

1: TOF MS ES+  
5.74e7

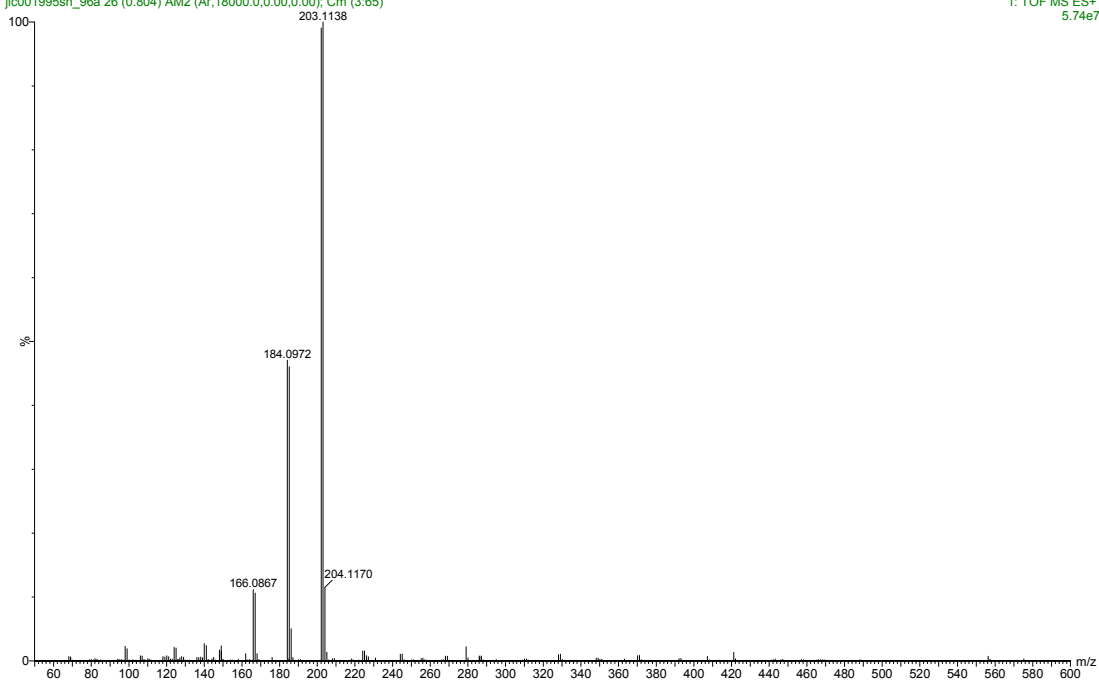

ESI HRMS:  $[M+H]^+$  calcd for  $C_9H_{15}NO_4$  202.1074; found 202.1076.

**N-Propynyl-1,6-dideoxy-1,6-imino-D-mannitol (26b):**

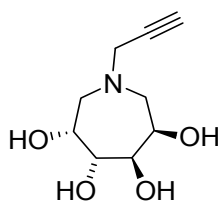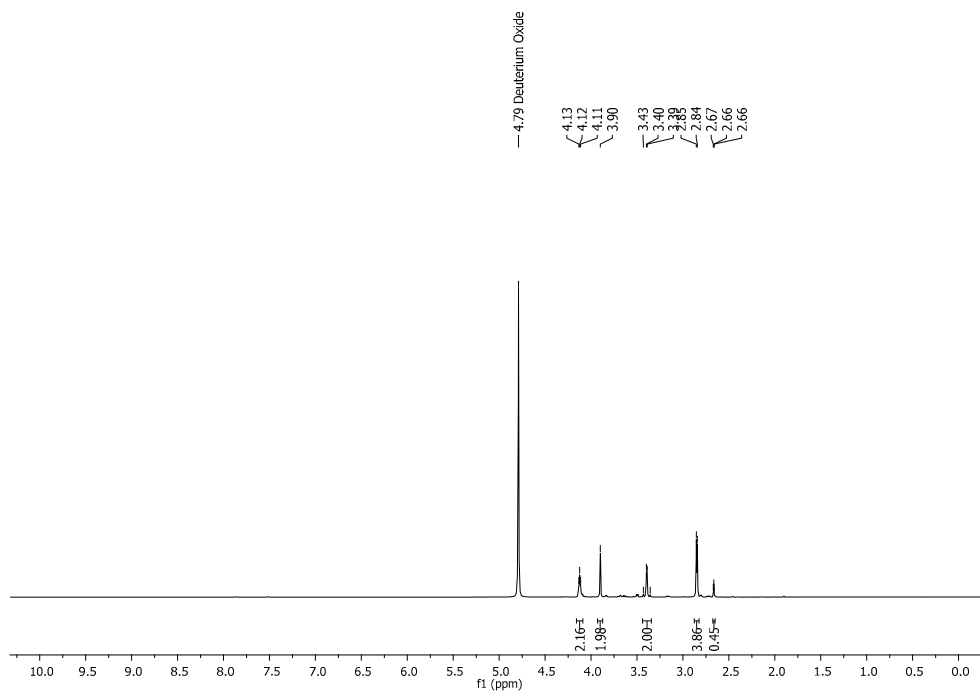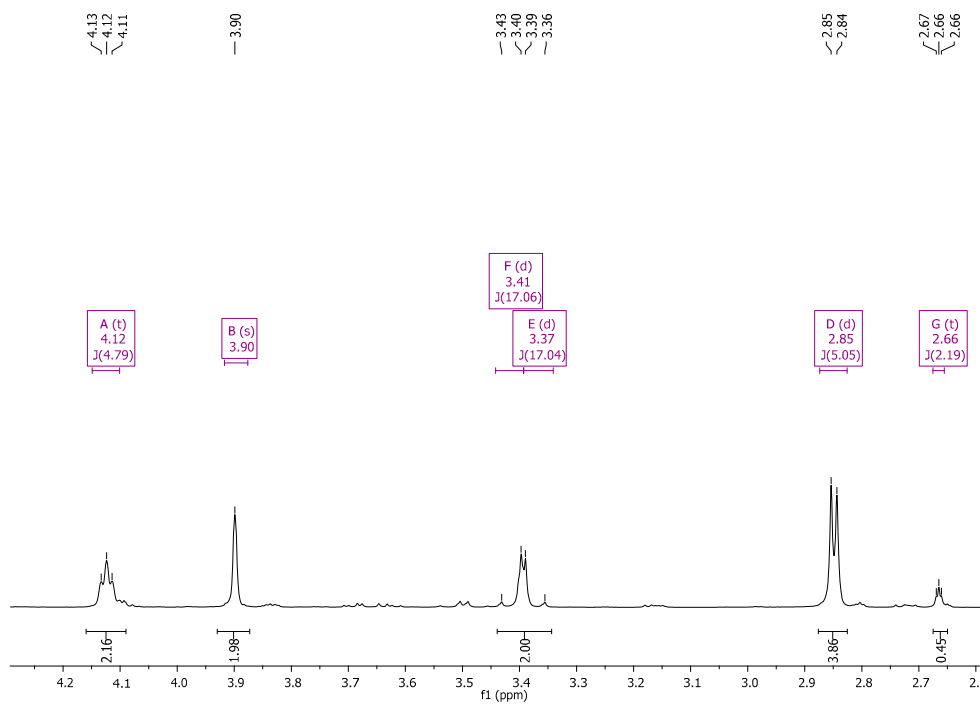

$^1\text{H}$  NMR (500 MHz,  $\text{D}_2\text{O}$ )

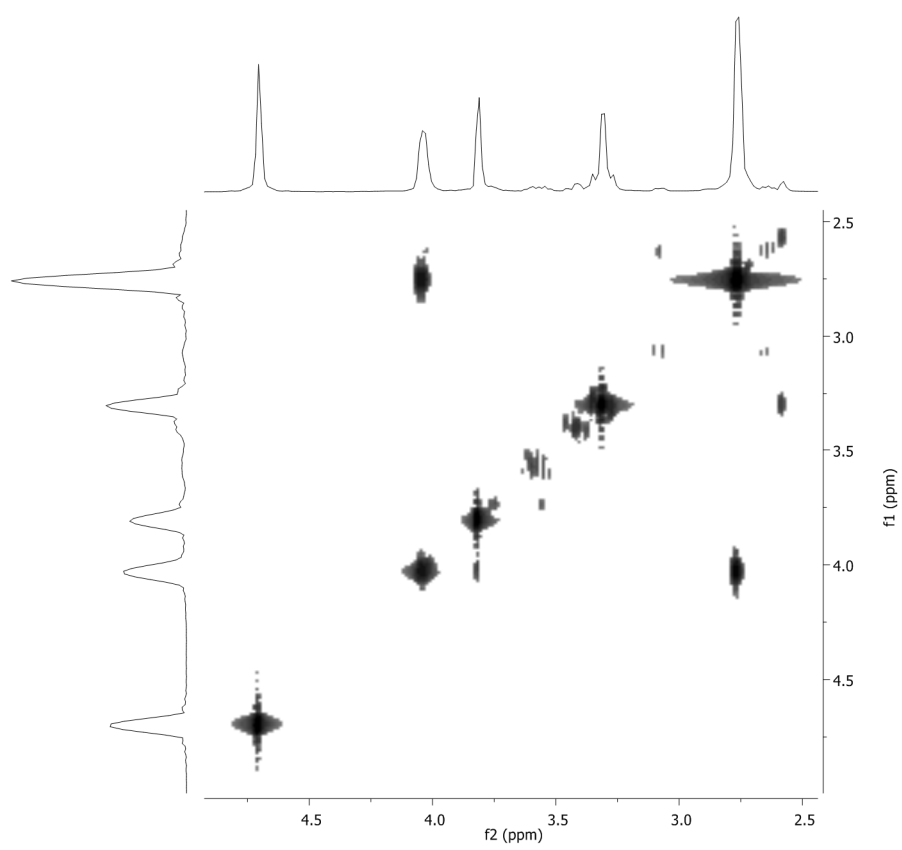

COSY NMR

— 72.37  
— 69.07  
— 55.67  
— 47.35

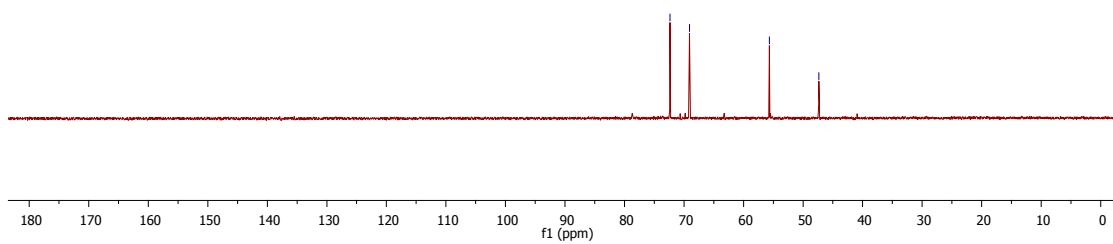

$^{13}\text{C}$  NMR (100 MHz,  $\text{D}_2\text{O}$ )



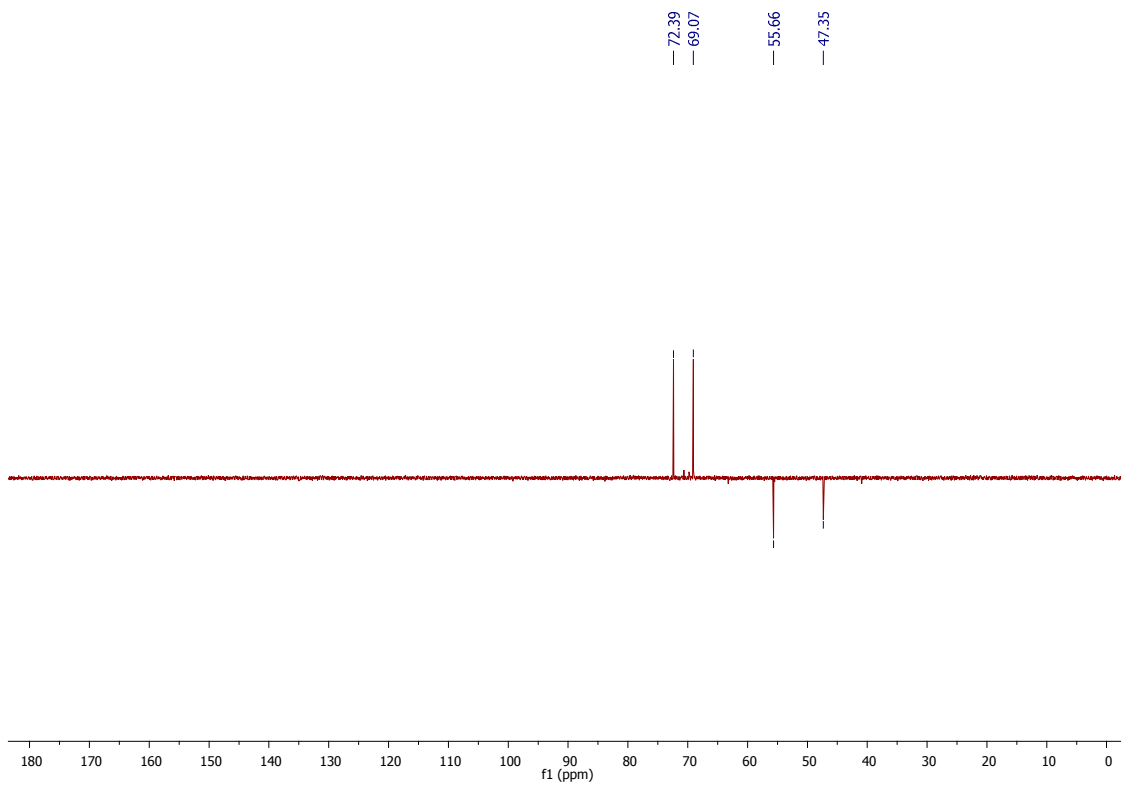

<sup>13</sup>C NMR DEPT (100 MHz, D<sub>2</sub>O)

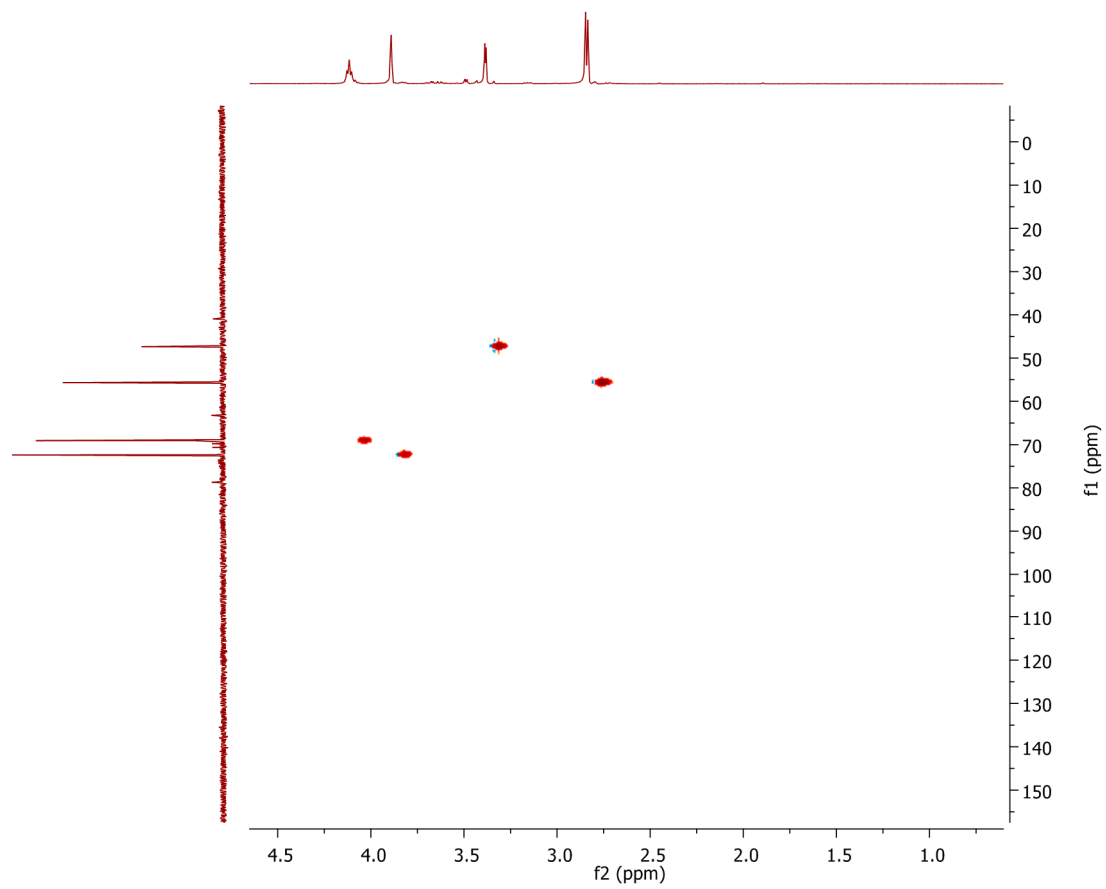

HMQC NMR

jic001995sn\_95a

jic001995sn\_95a 51 (1.547) AM2 (Ar,18000.0,0.00,0.00); Cm (3.63)

1: TOF MS ES+  
4.73e7

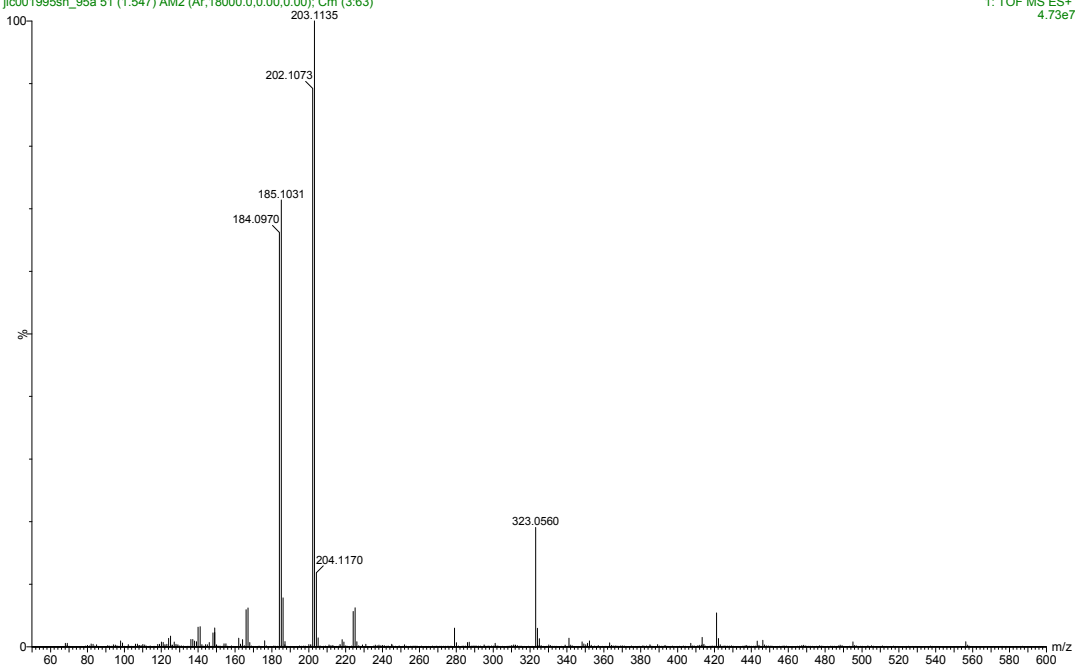

ESI HRMS:  $[M+H]^+$  calcd for  $C_9H_{15}NO_4$  202.1074; found 202.1073.

***N*-Butyl-1,5-dideoxy-1,5-imino-L-gulitol (27a):**

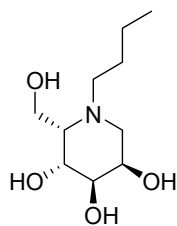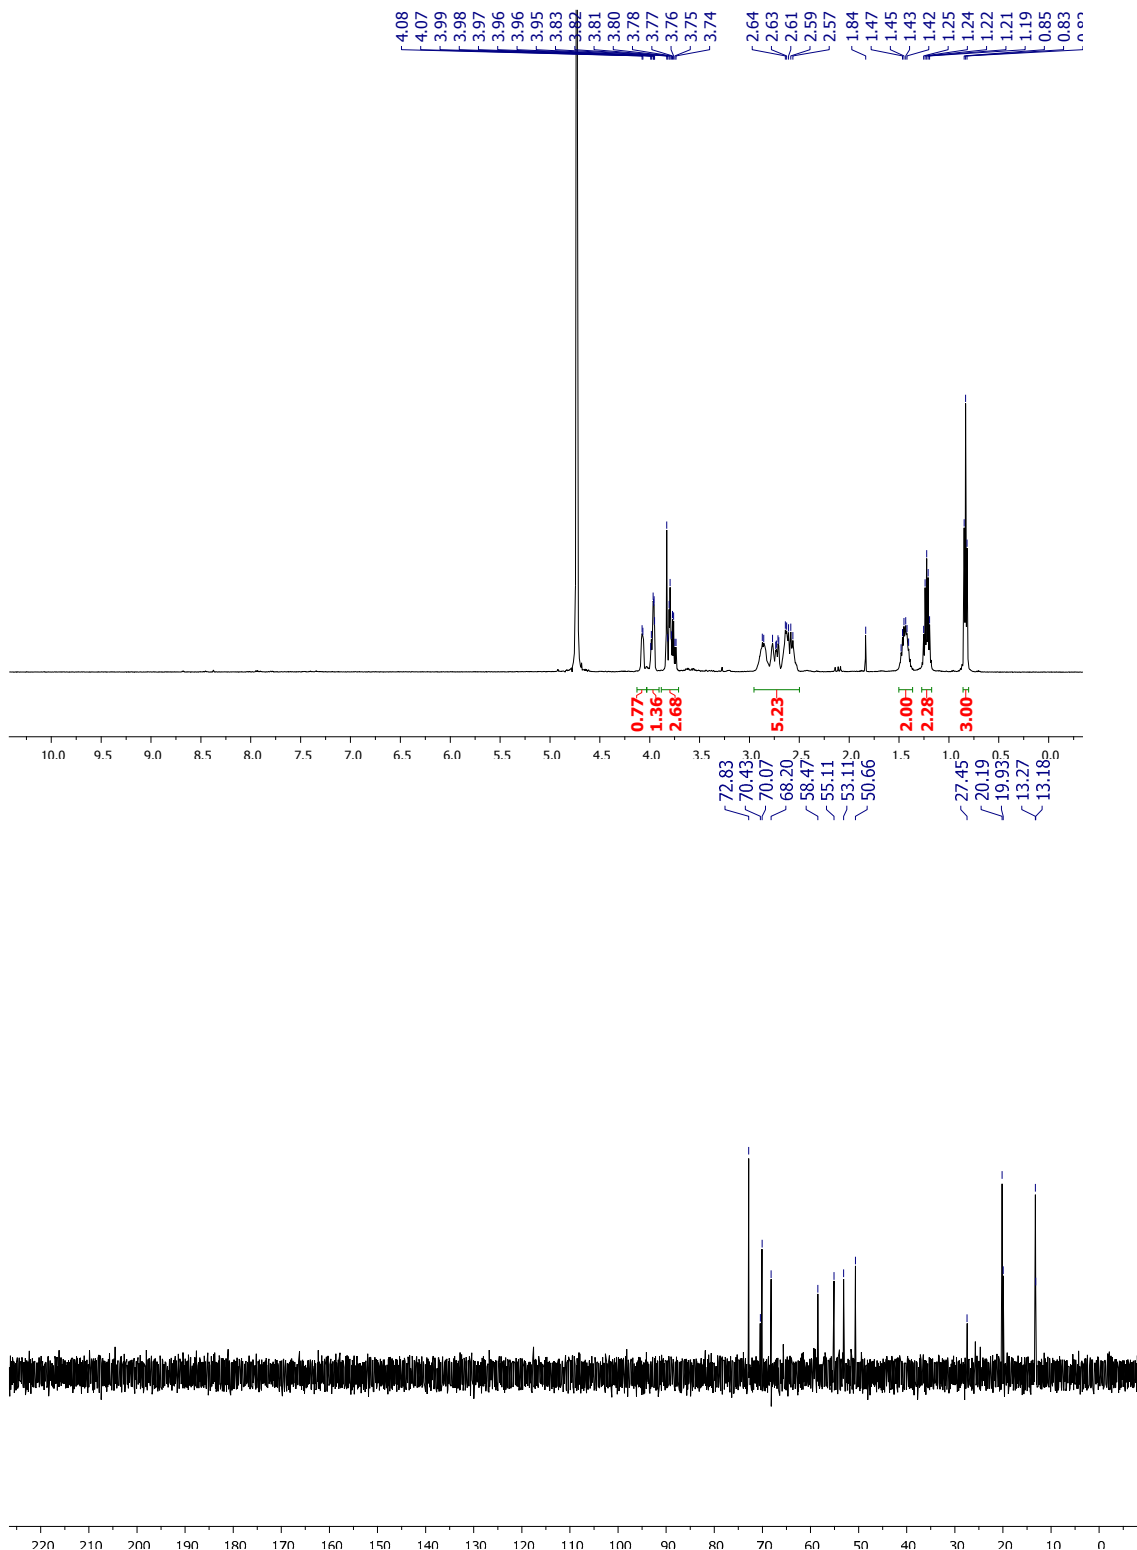

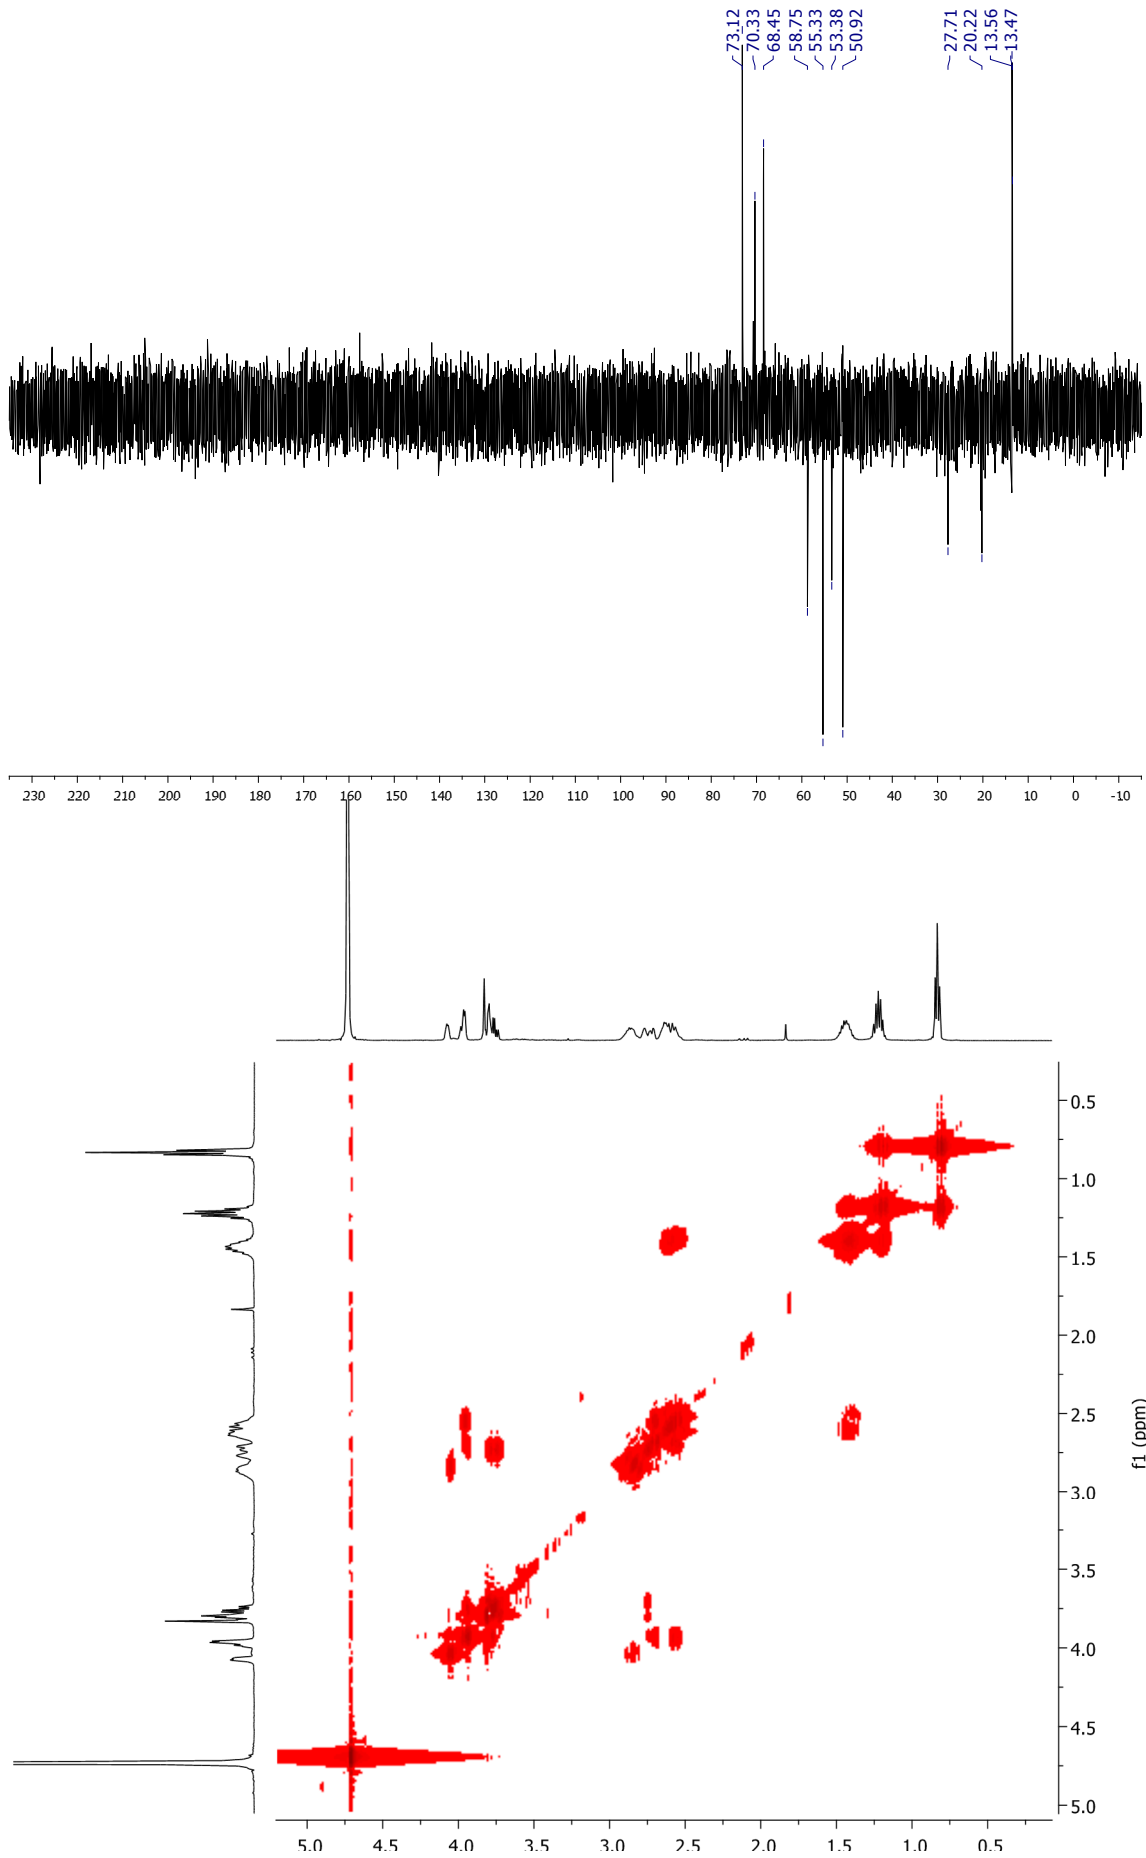

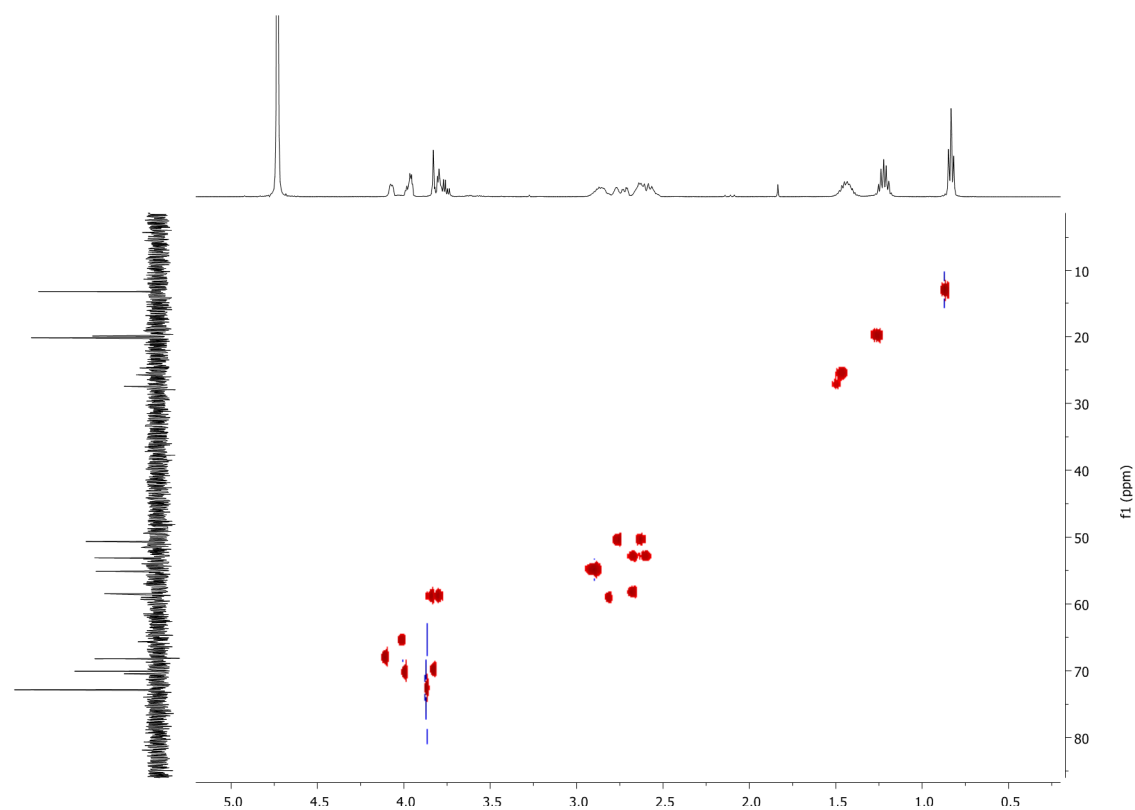

210Z.raw#25 @0.23 MS1 p +, base peak: 220.1538 m/z (1.8E10)  
Scan definition: FTMS + p ESI Full ms [100.00-1500.00]

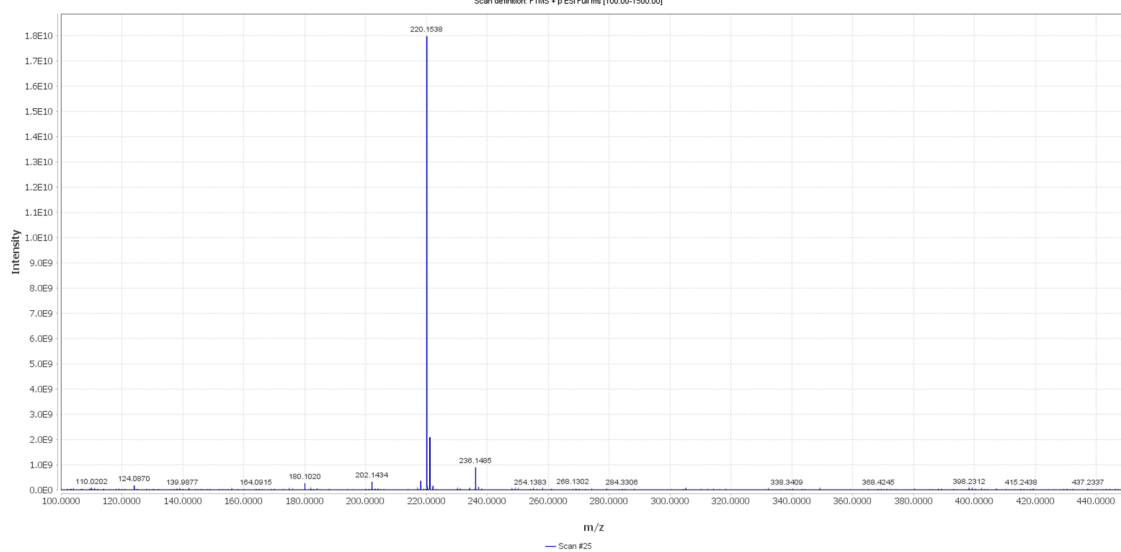

ESI HRMS:  $[M+H]^+$  calcd for  $C_{10}H_{22}NO_4$  220.1544; found 220.1538.

***N*-Butyl-1,6-dideoxy-1,6-imino-D-mannitol (27b):**

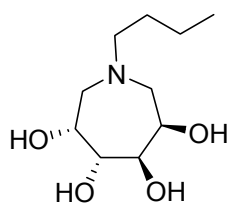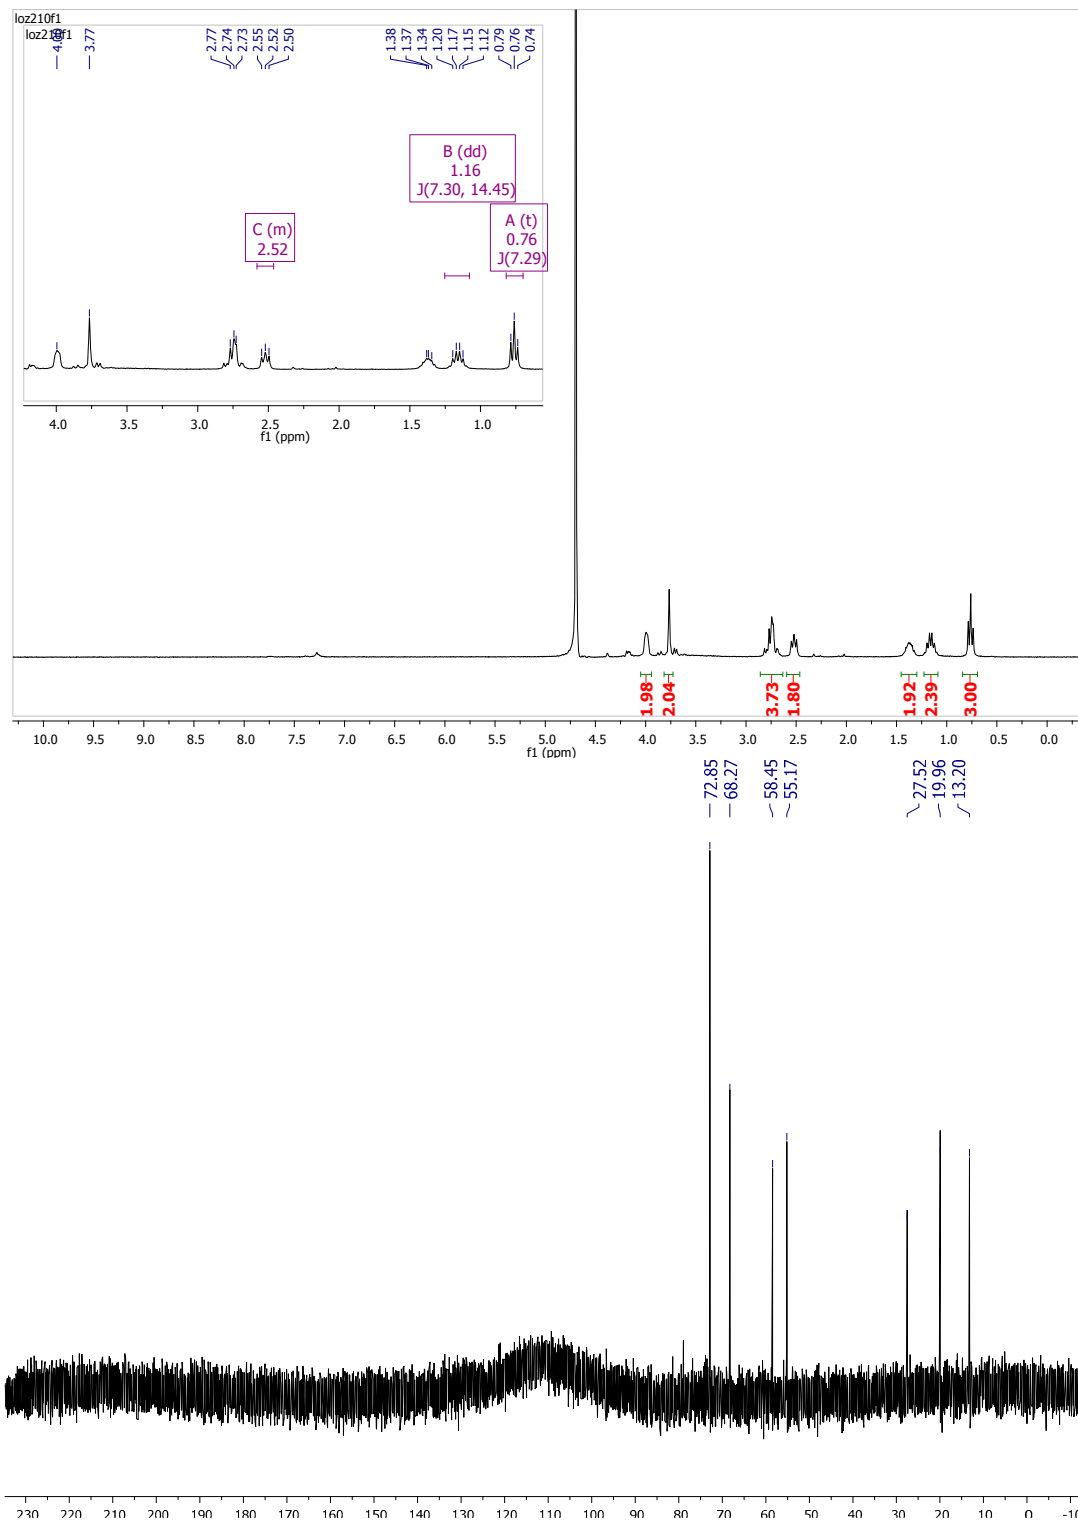

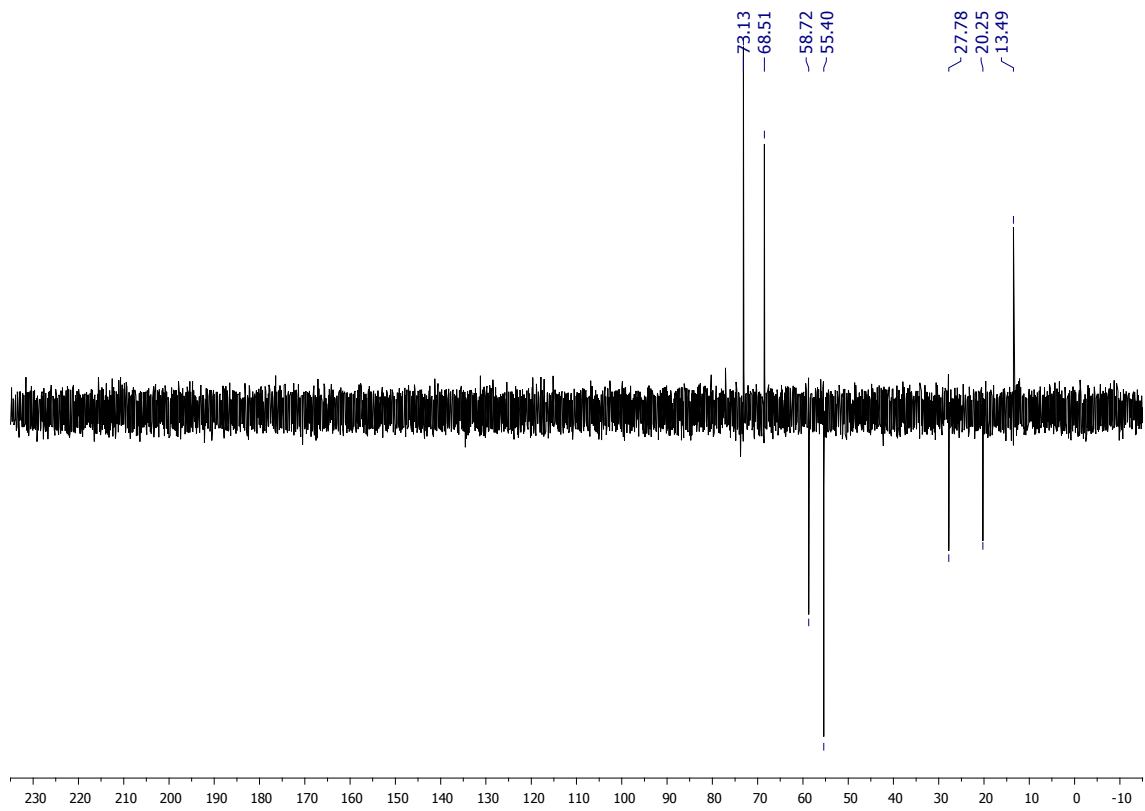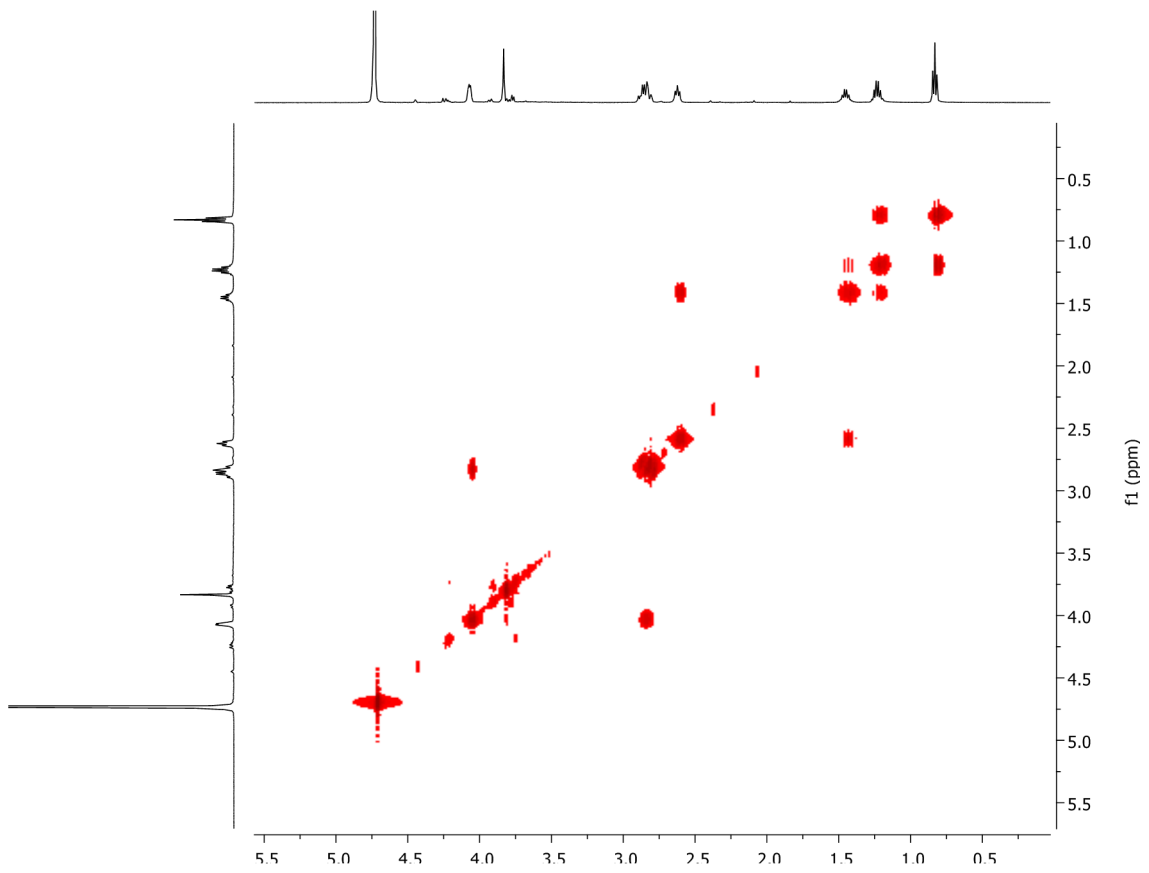

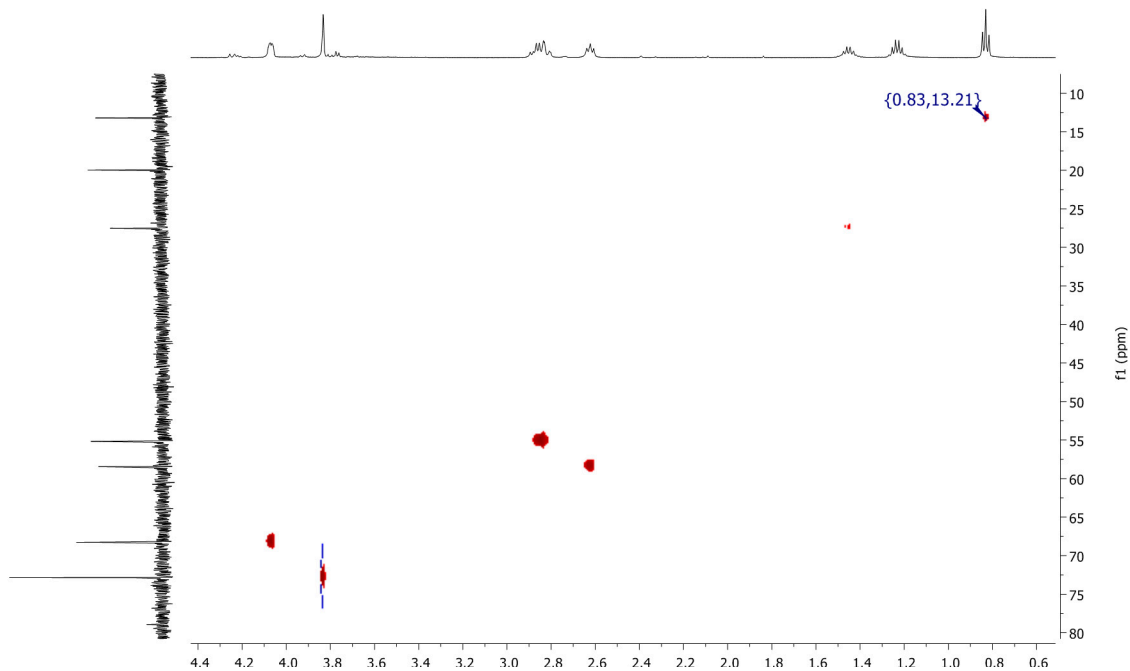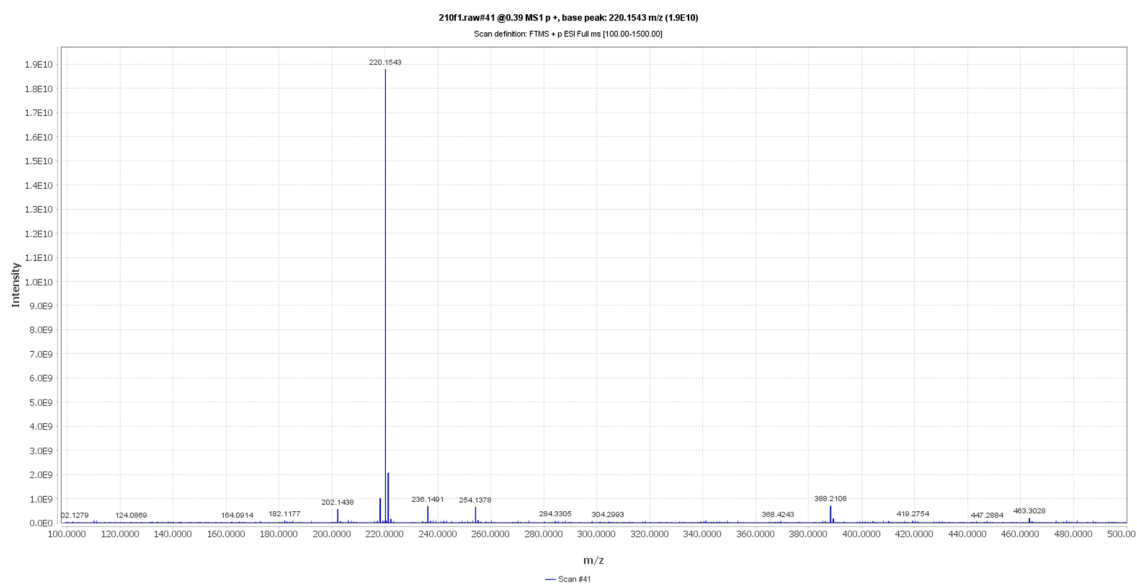

ESI HRMS:  $[M+H]^+$  calcd for  $C_{10}H_{22}NO_4$  220.1544; found 220.1543



***N*-Hydroxyethyl-1,5-dideoxy-1,5-imino-L-gulitol (28a):**

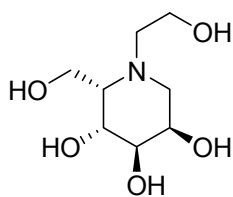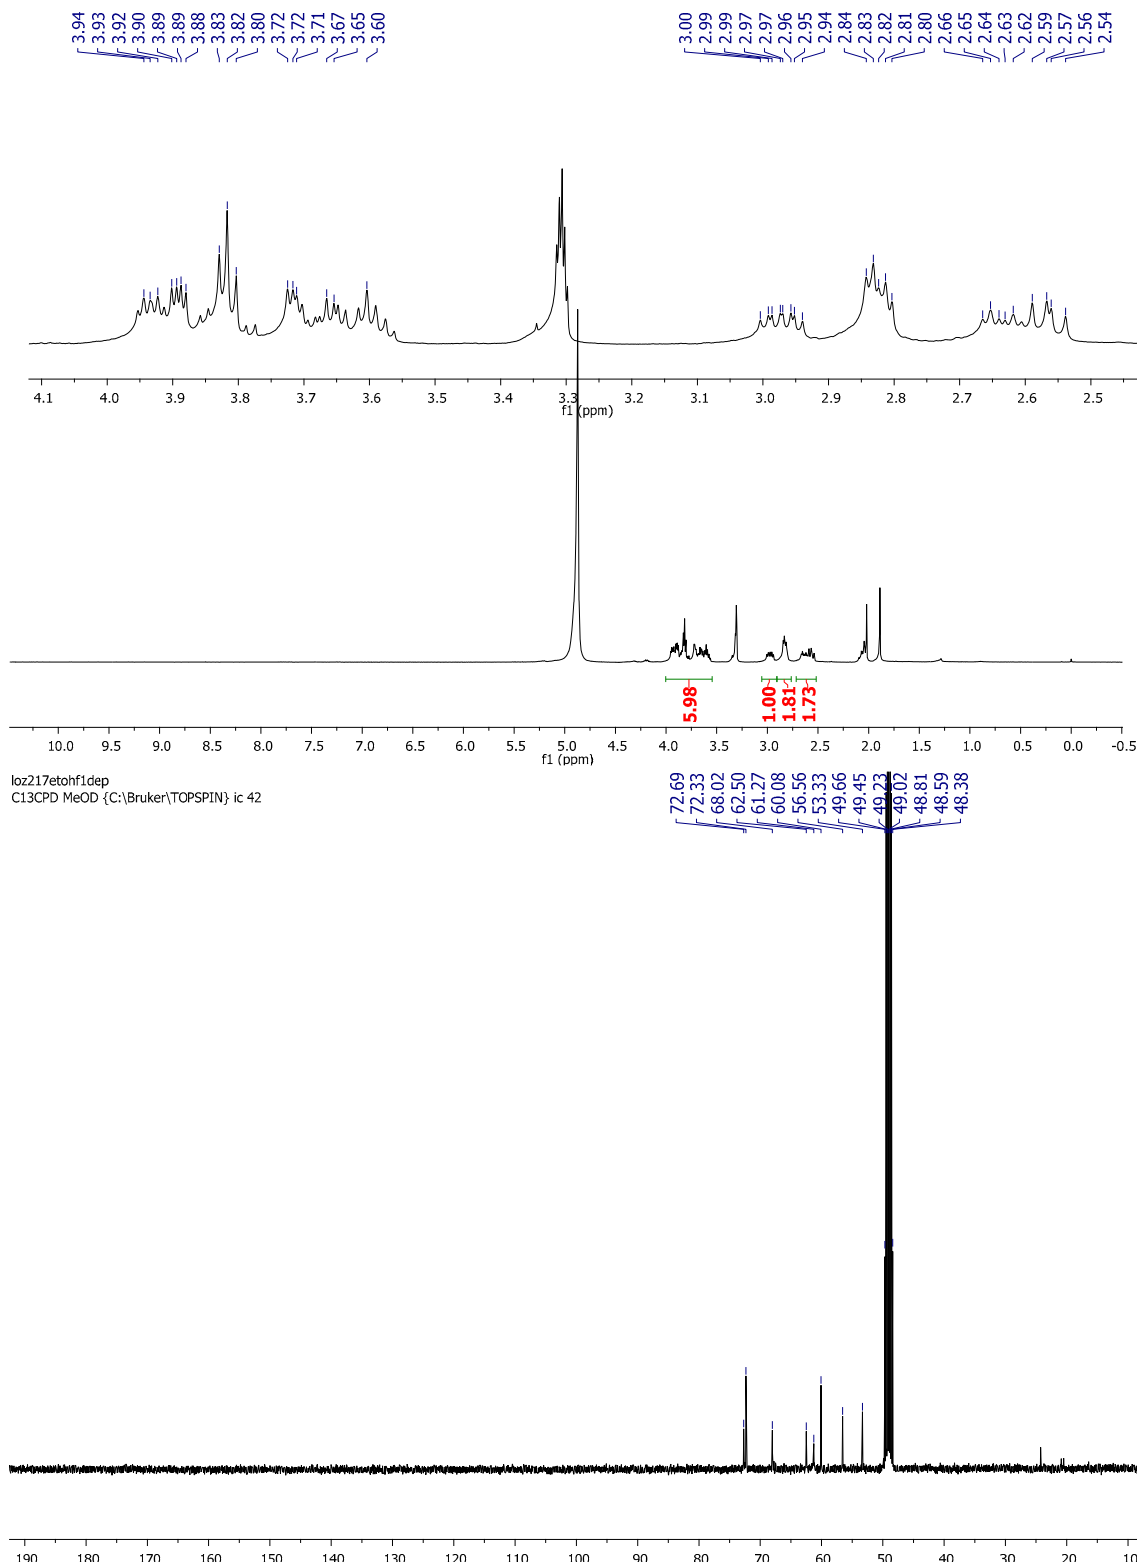

loz217etohf1dep  
C13DEPT135 MeOD (C:\Bruker\TOPSPIN) ic 42

72.69  
72.31  
67.99  
62.48  
61.31  
60.05  
56.54  
53.32

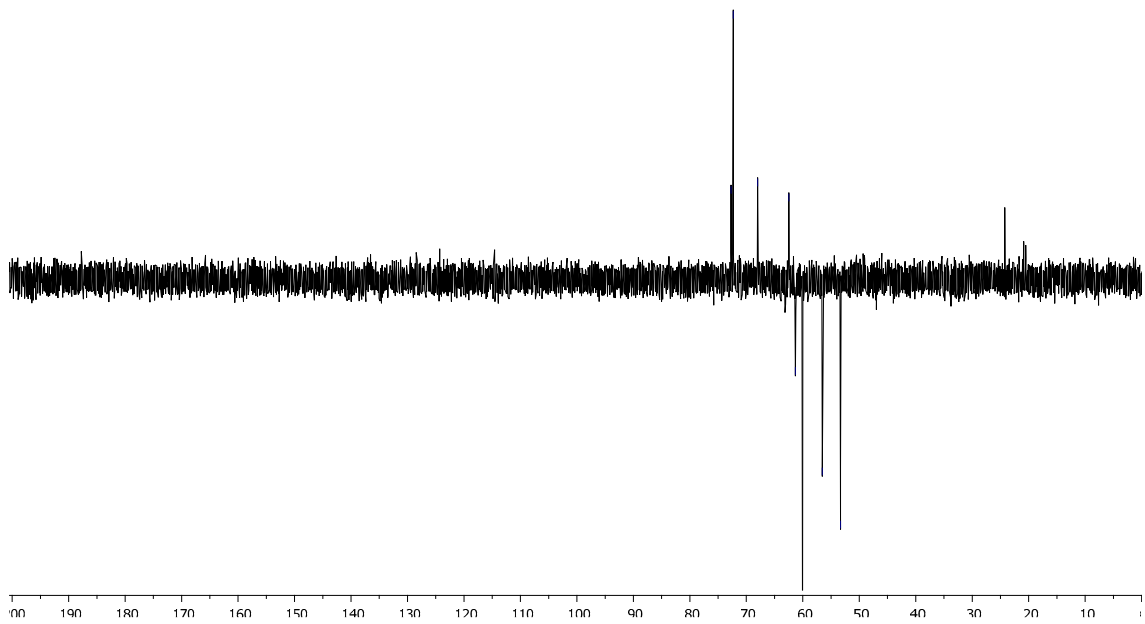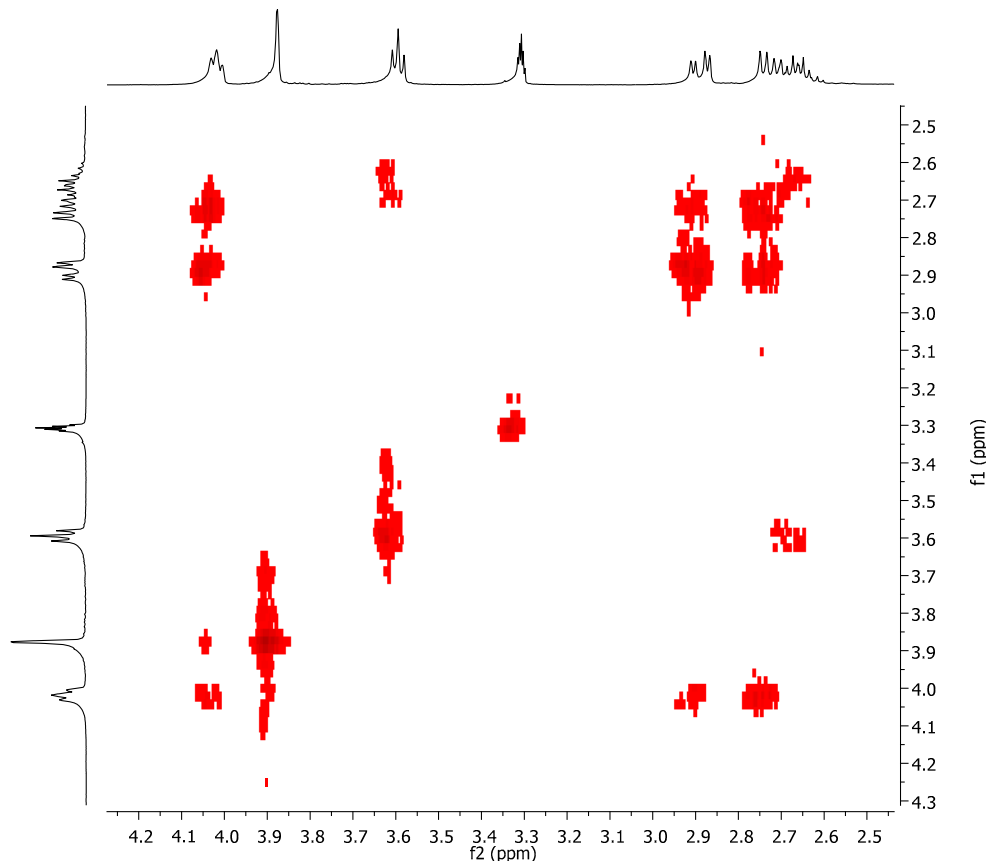

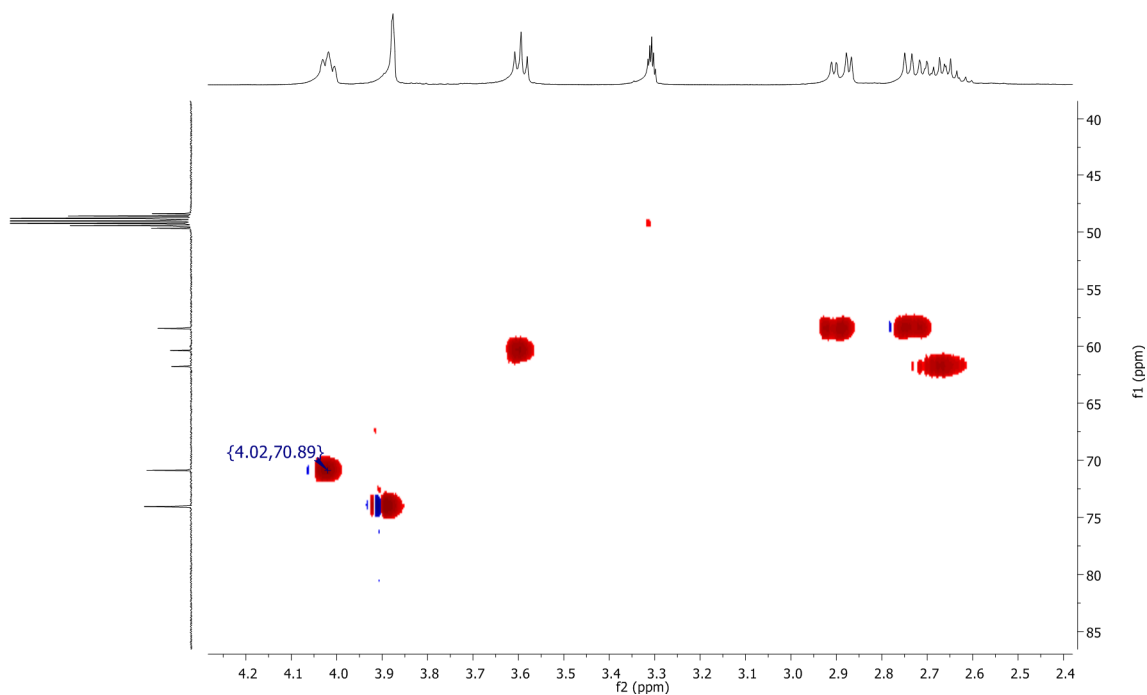

217etohf1raw#25 @0.24 MS1 p +, base peak 208.1177 m/z (2.0E10)  
Scan definition: FTMS + p ESI Full ms [100.00-1500.00]

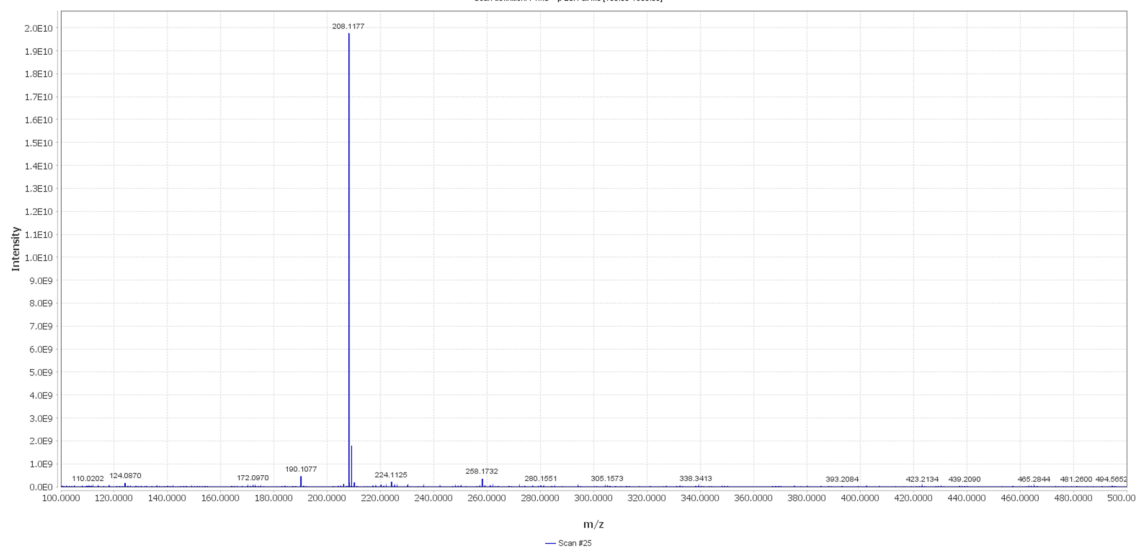

ESI HRMS:  $[M+H]^+$  calcd for  $C_8H_{18}NO_5$  208.1180; found 208.1177

### N-Hydroxyethyl-1,6-imino-D-mannitol (28b):

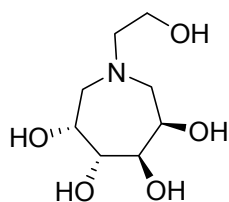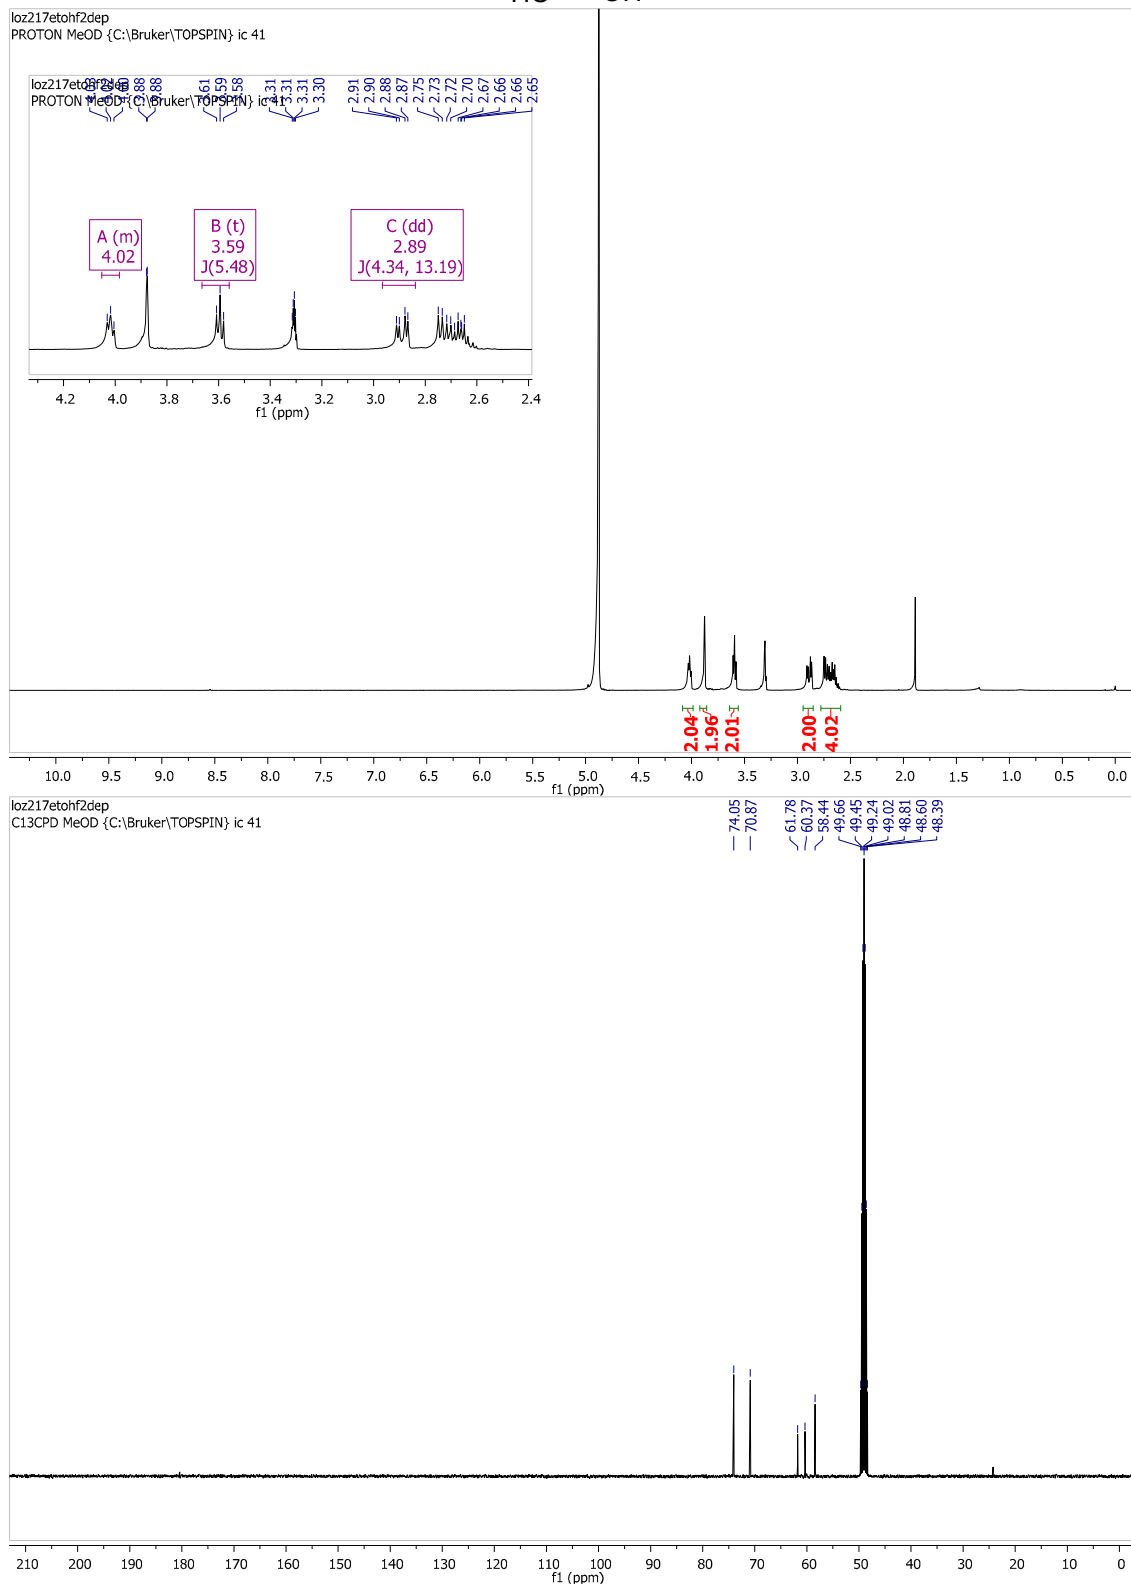

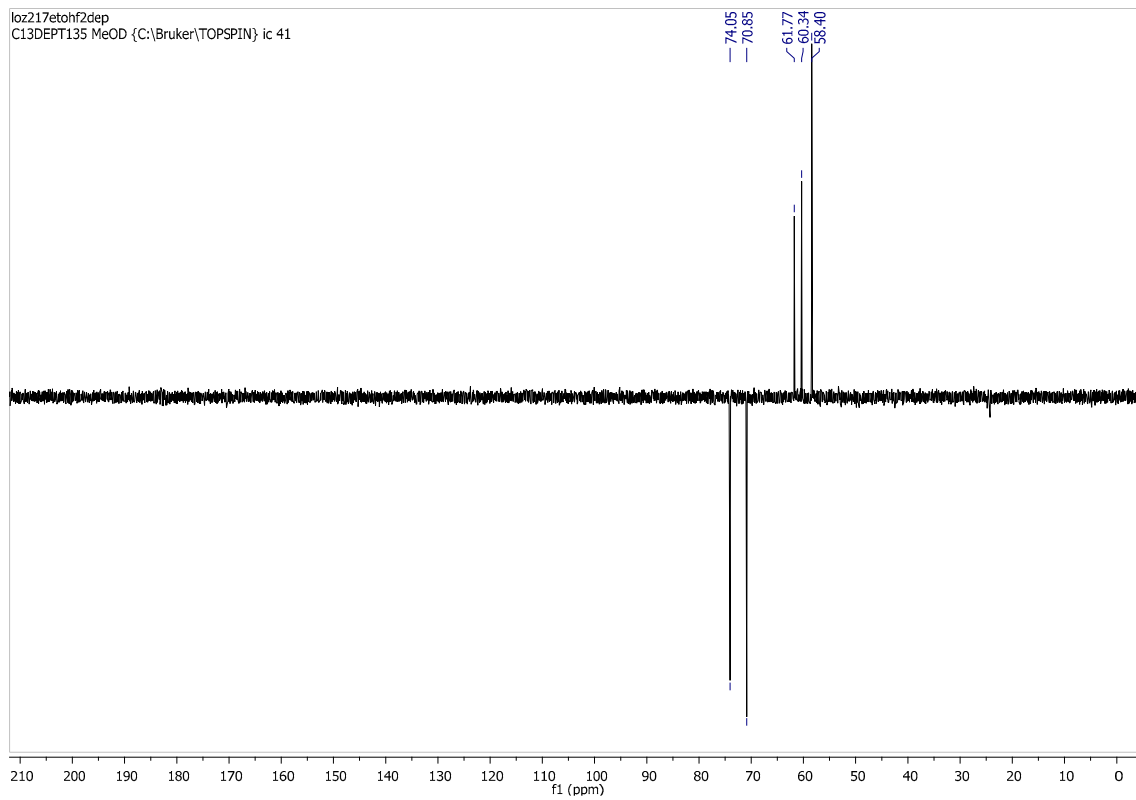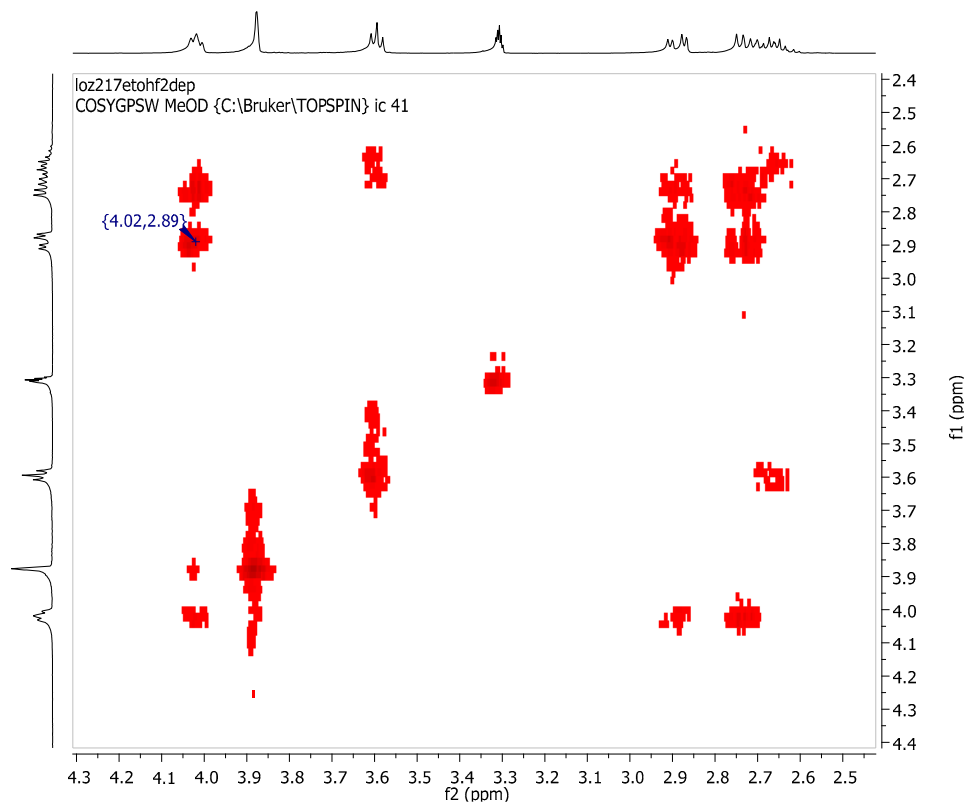

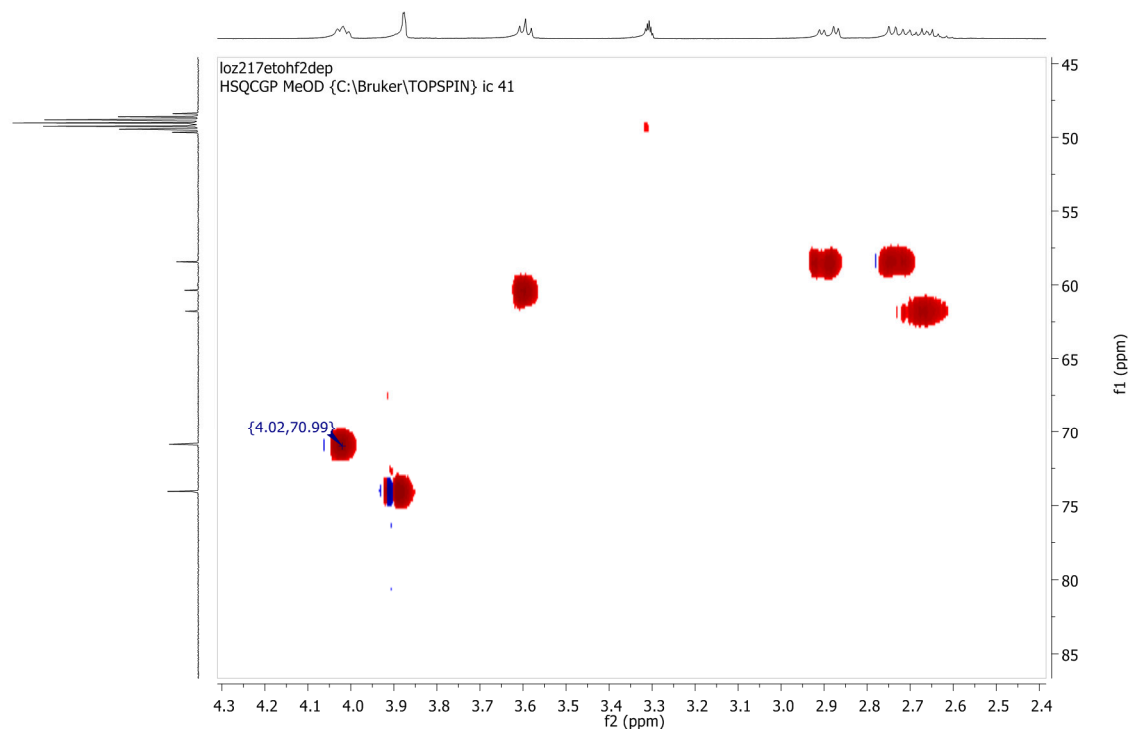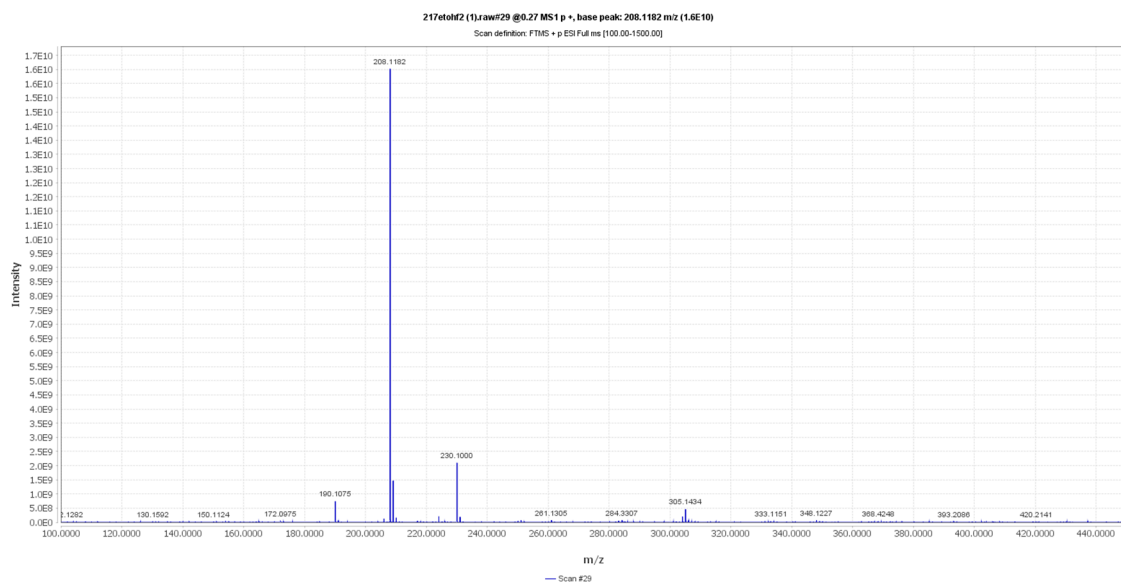

ESI HRMS:  $[\text{M}+\text{H}]^+$  calcd for  $\text{C}_8\text{H}_{18}\text{NO}_5$  208.1180; found 208.1182

***N*-Phenethyl-1,5-dideoxy-1,5-imino-L-gulitol (29a):**

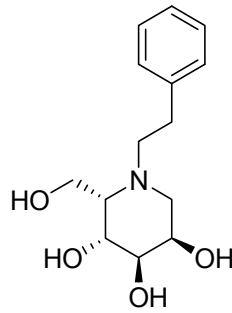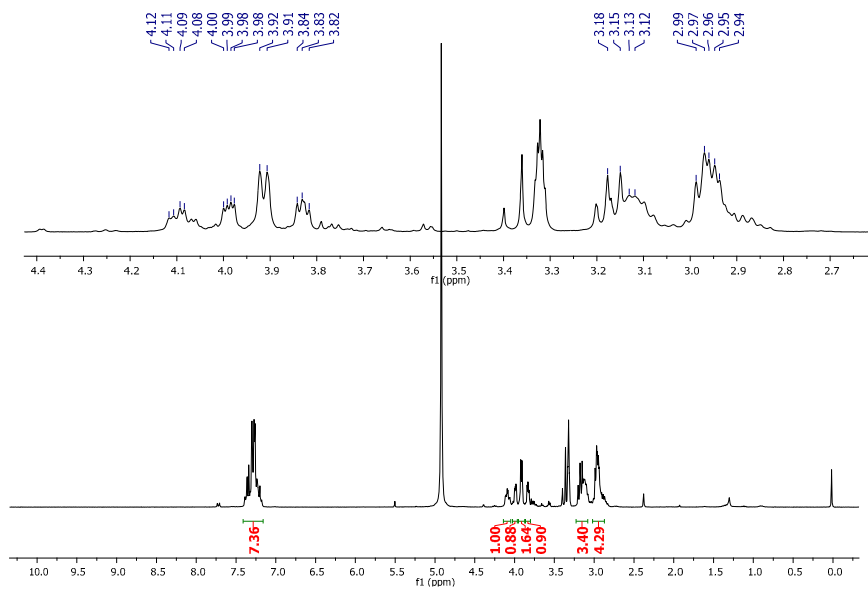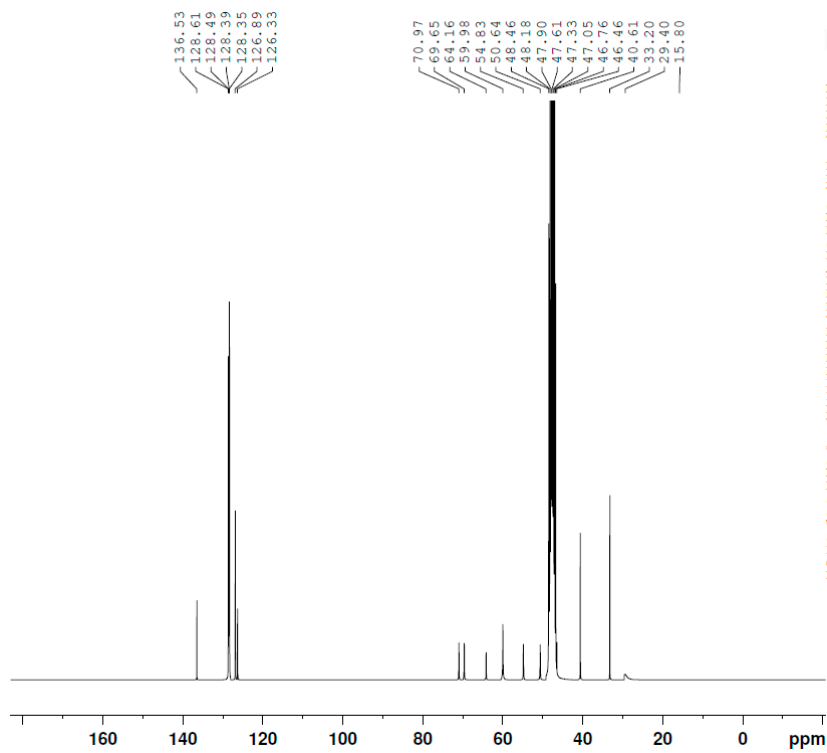

**N-Phenethyl-1,6-dideoxy-1,6-imino-D-mannitol (29b):**

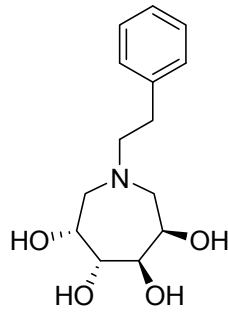

loz217fenellf2\_4  
PROTON: MeOD (C:)Bruker(TOPSPIN) ic 28

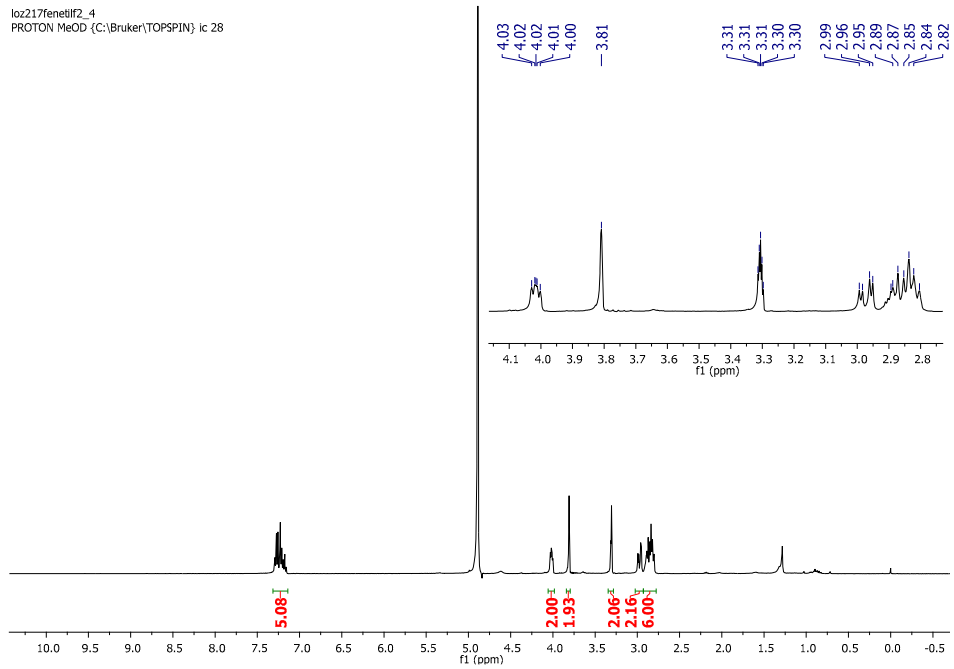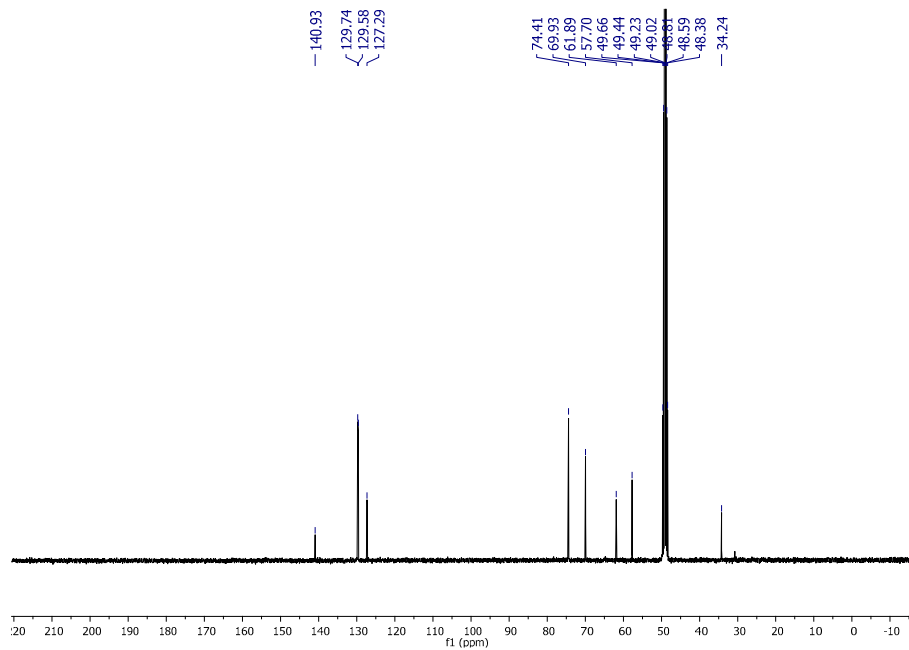



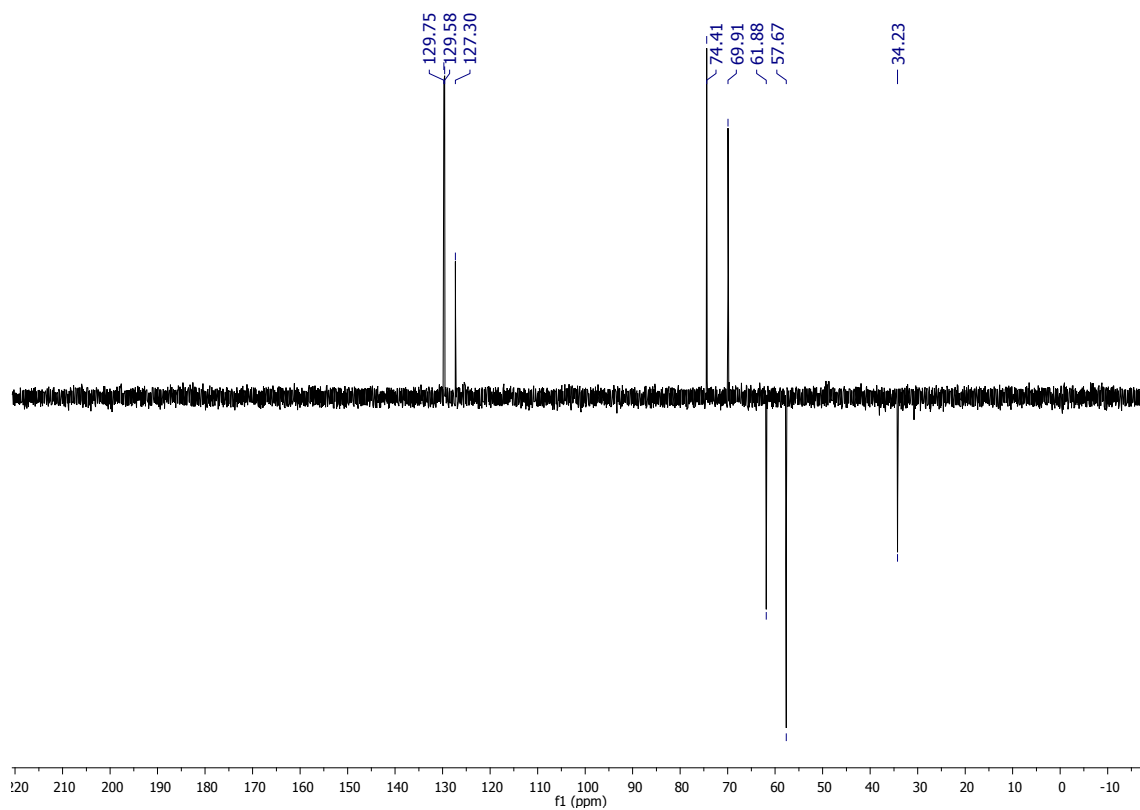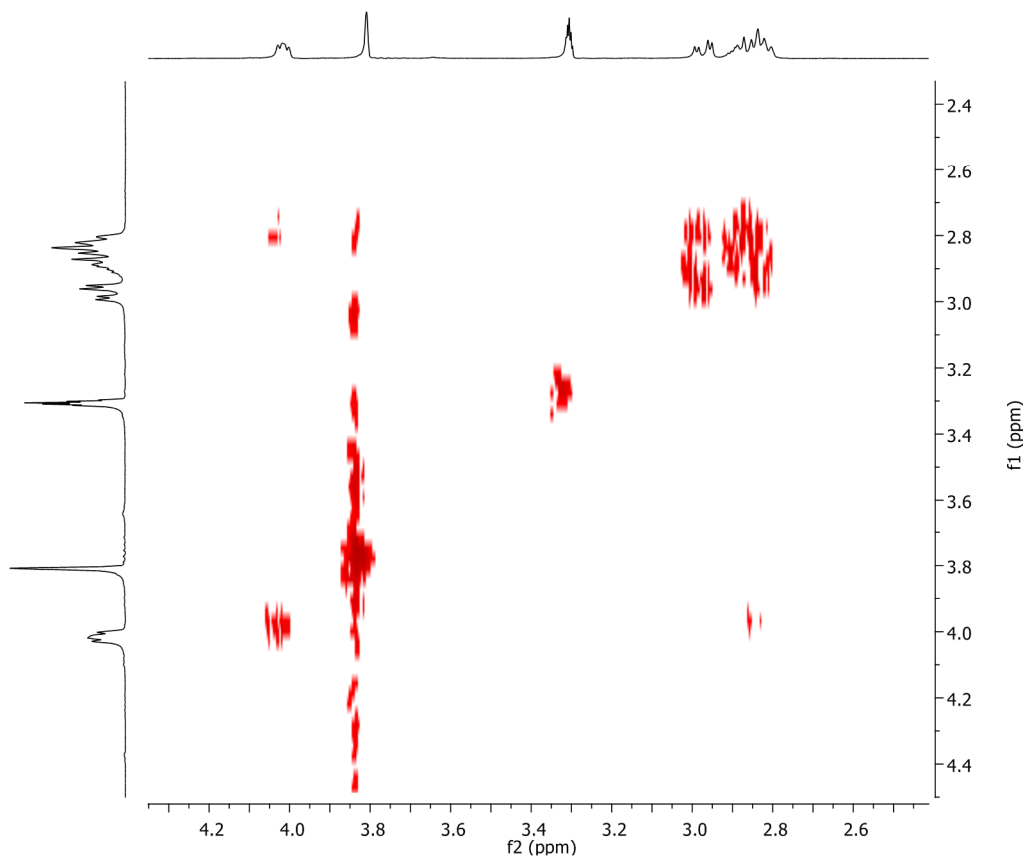

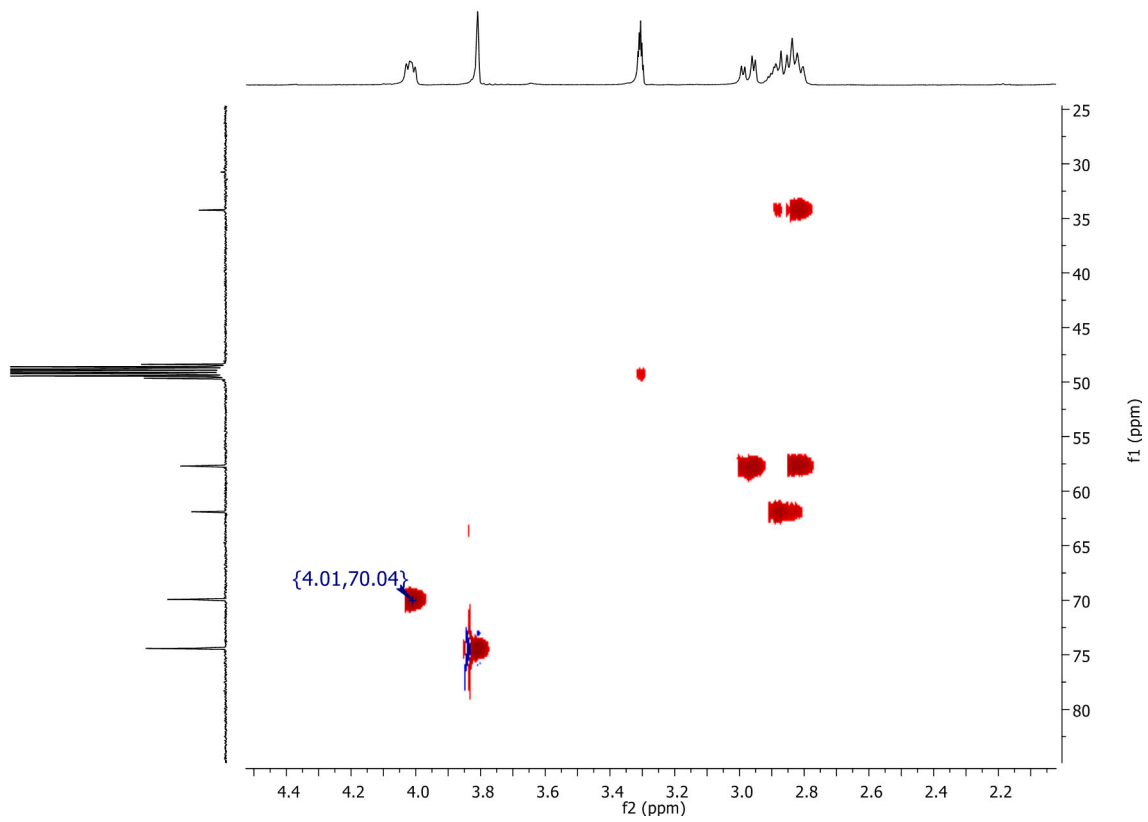

***N*-Propynyl-2,3,4,6-tetra-*O*-acetyl-1,5-dideoxy-1,5-imino-L-gulitol (30a):**

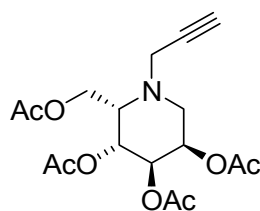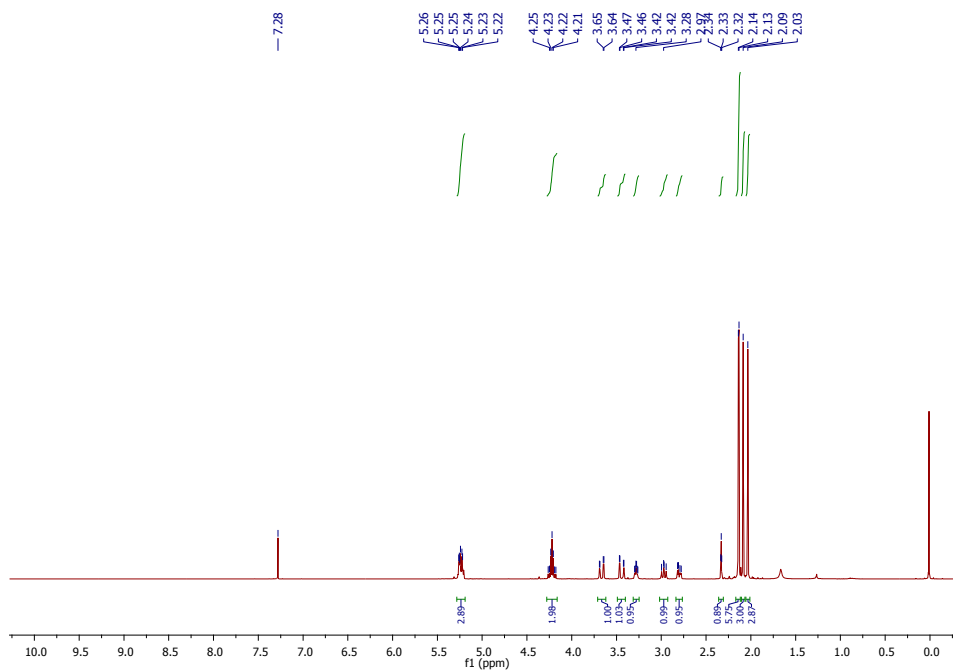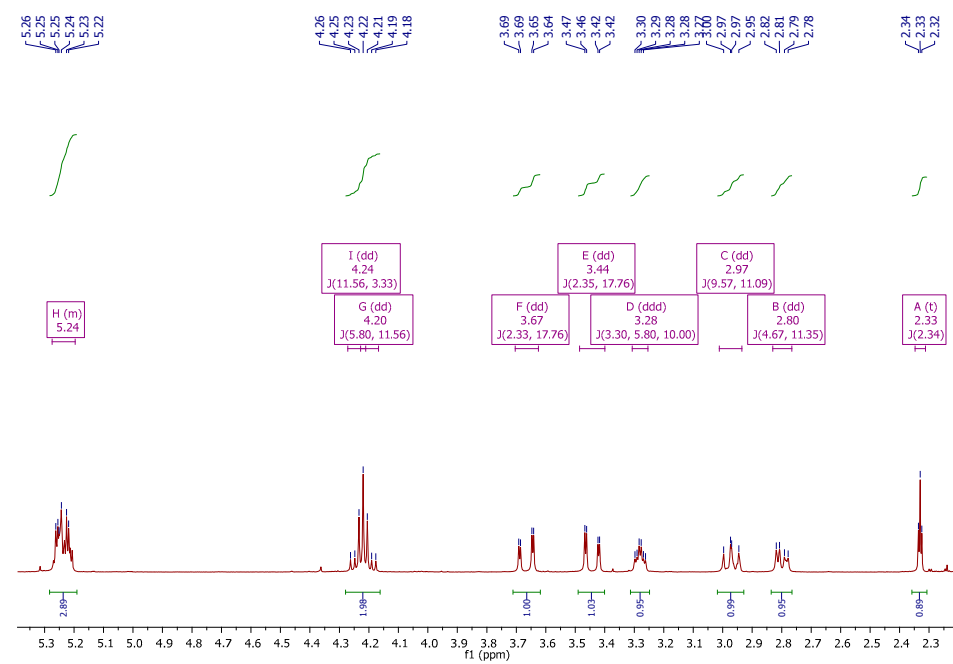

$^1\text{H}$  NMR (400 MHz,  $\text{CD}_3\text{OD}$ )

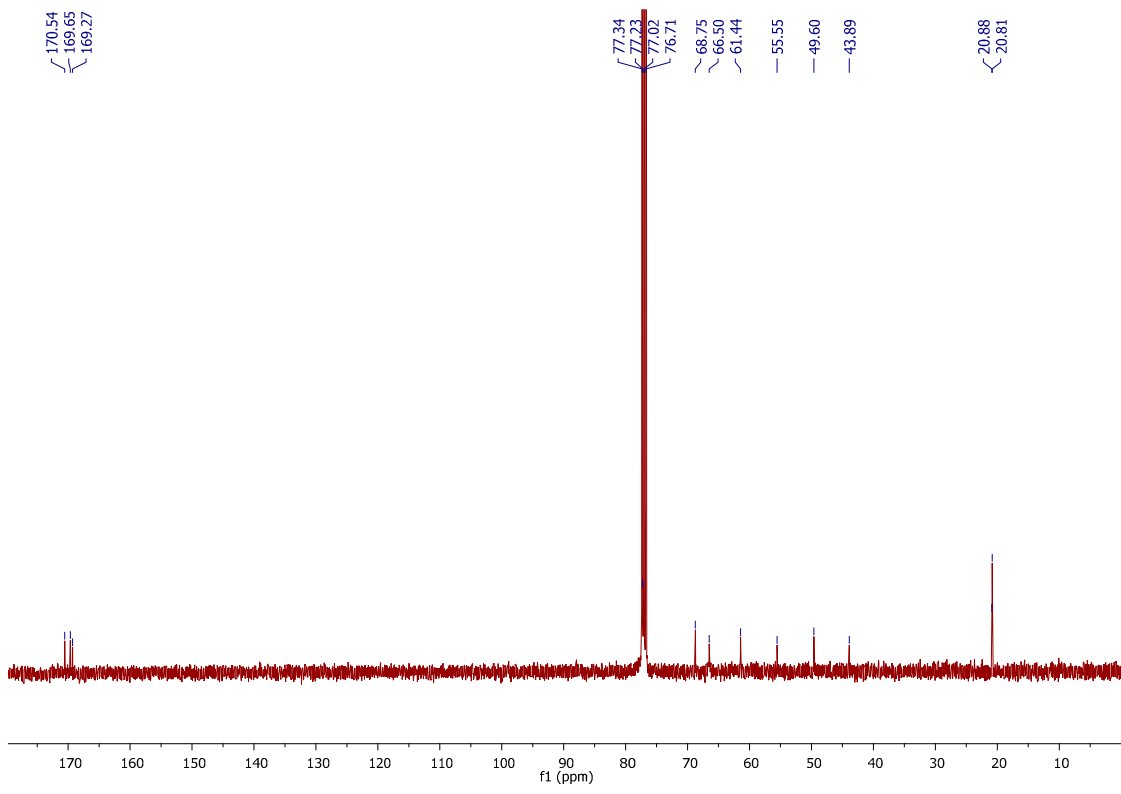

$^{13}\text{C}$  NMR (100 MHz,  $\text{CD}_3\text{OD}$ )

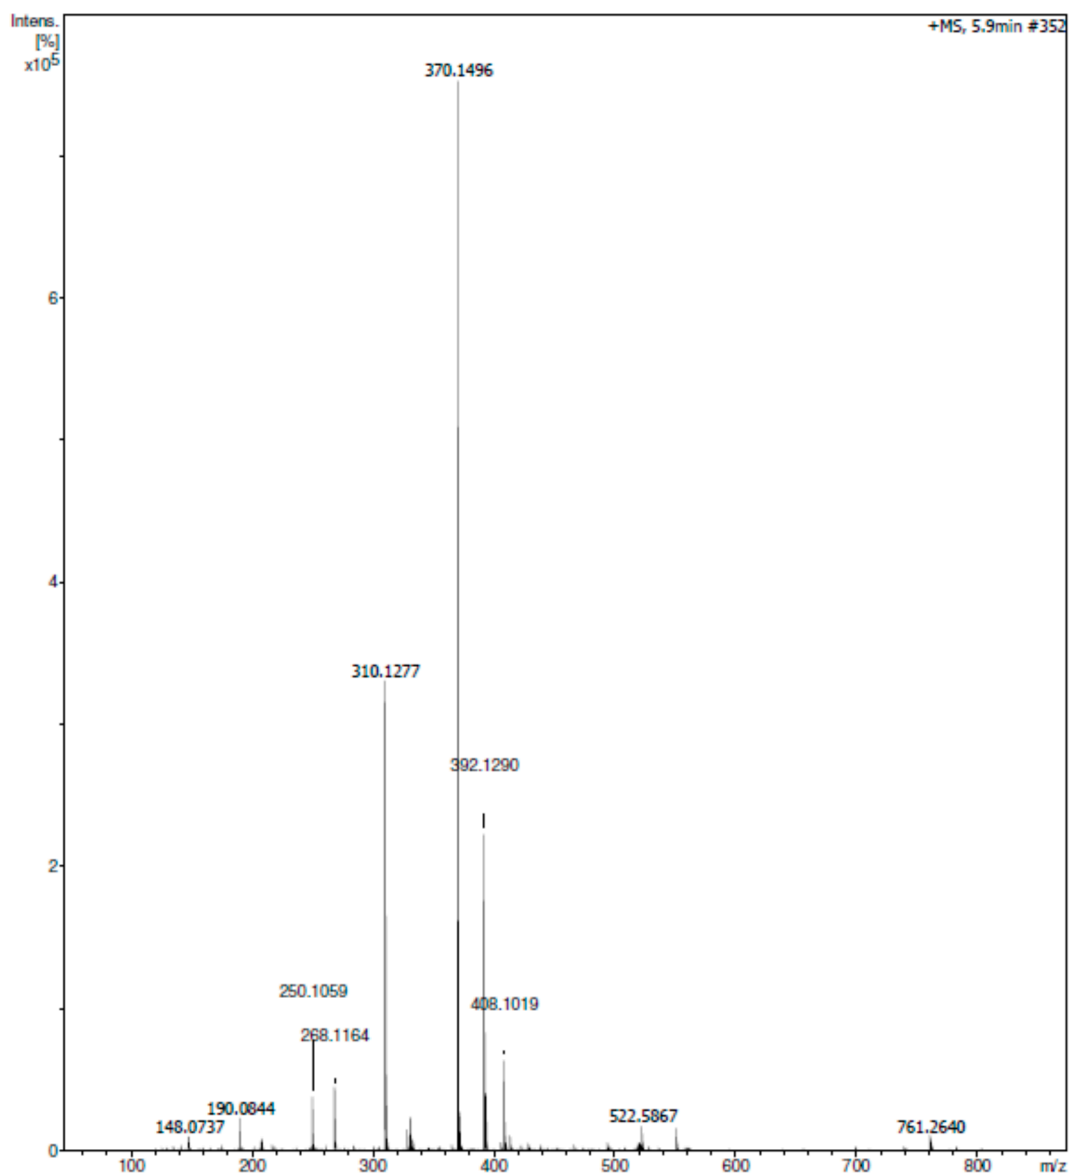

ESI HRMS:  $[M+H]^+$  calcd for  $C_{17}H_{24}NO_8$  370.1496; found 370.1496.

***N*-Propynyl-2,3,4,6-tetra-*O*-acetyl-1,6-dideoxy-1,6-imino-*D*-mannitol (30b):**

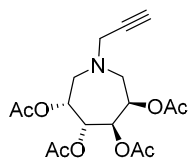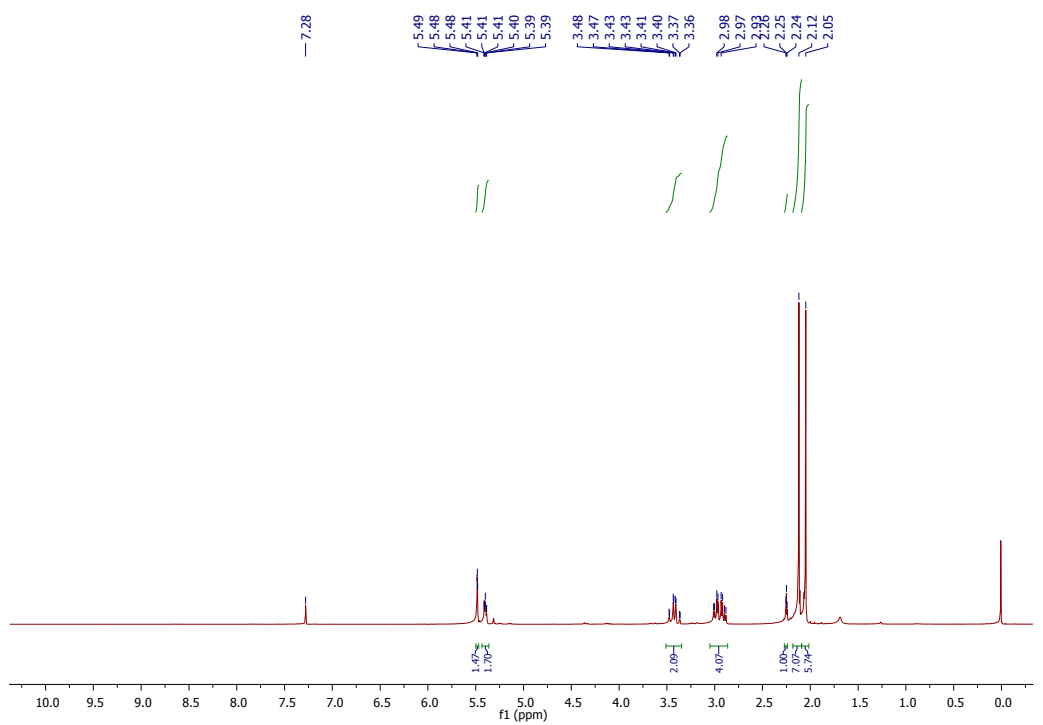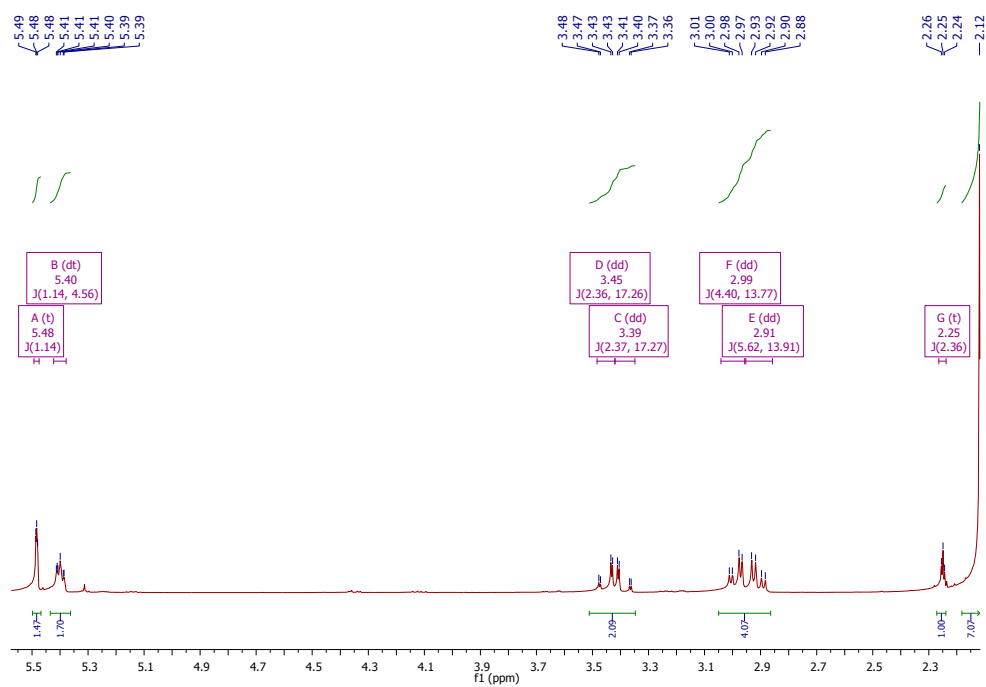

<sup>1</sup>H NMR (400 MHz, CD<sub>3</sub>OD)

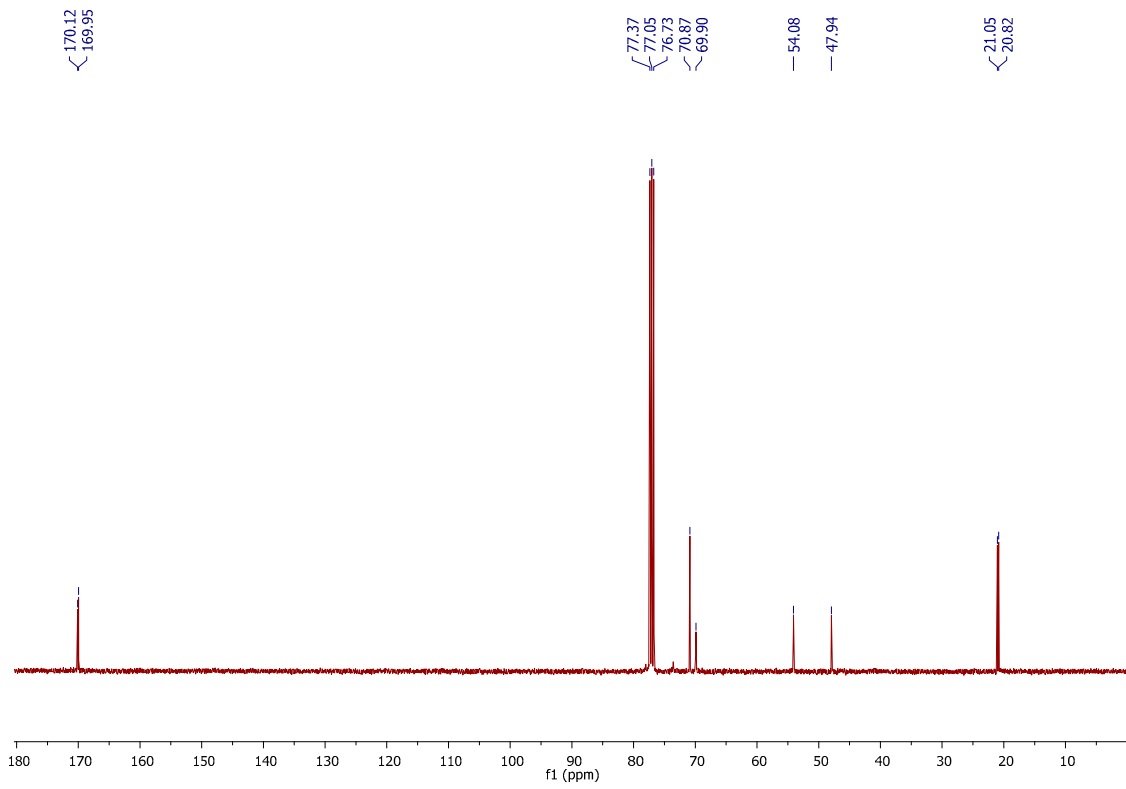

<sup>13</sup>C NMR (100 MHz, CD<sub>3</sub>OD)

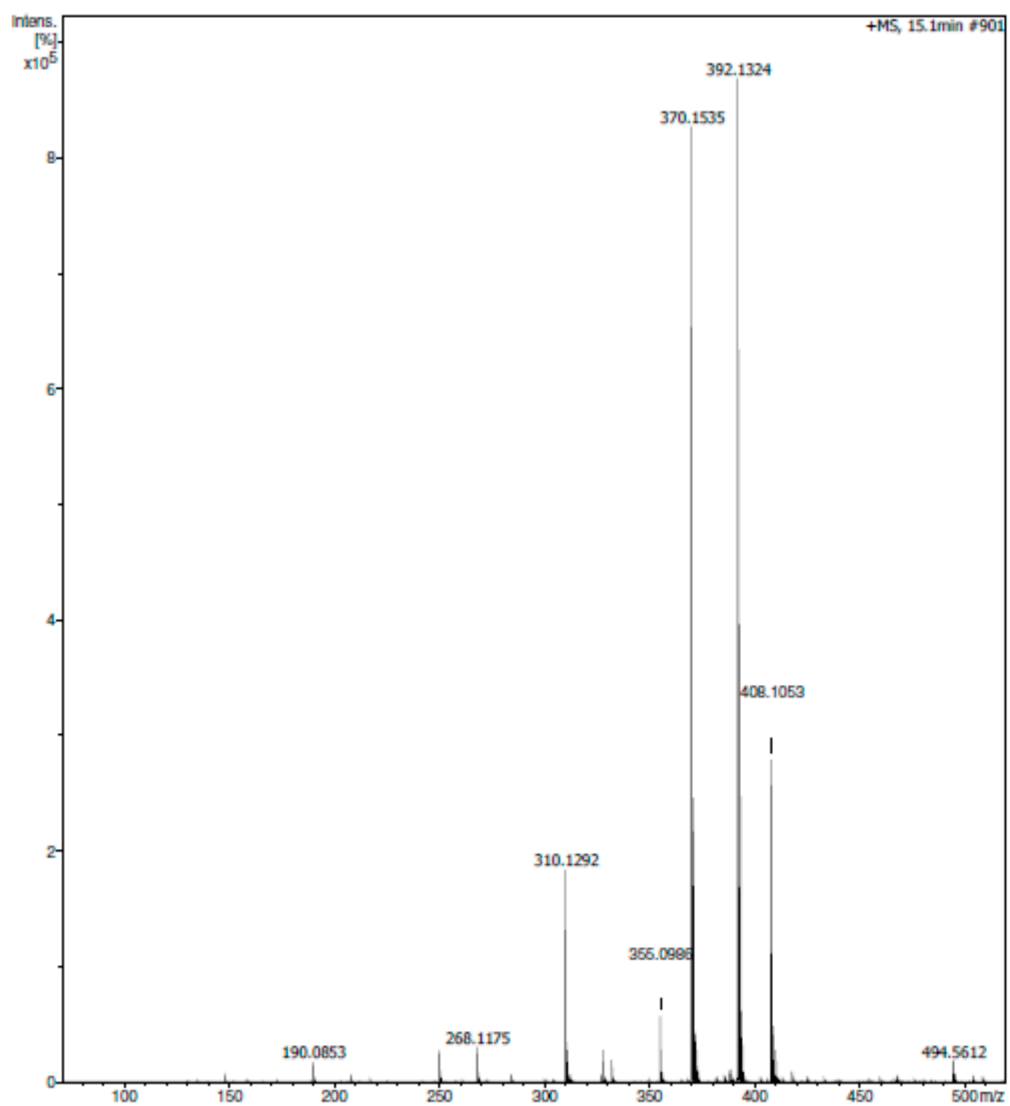

ESI HRMS:  $[M+H]^+$  calcd for  $C_{17}H_{24}NO_8$  370.1496; found 370.1535.



***N*-Acetoxyethyl-2,3,4,6-tetra-*O*-acetyl-1,5-dideoxy-1,5-imino-L-gulitol (31a):**

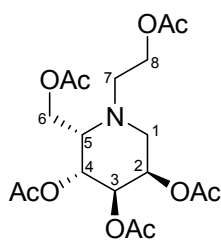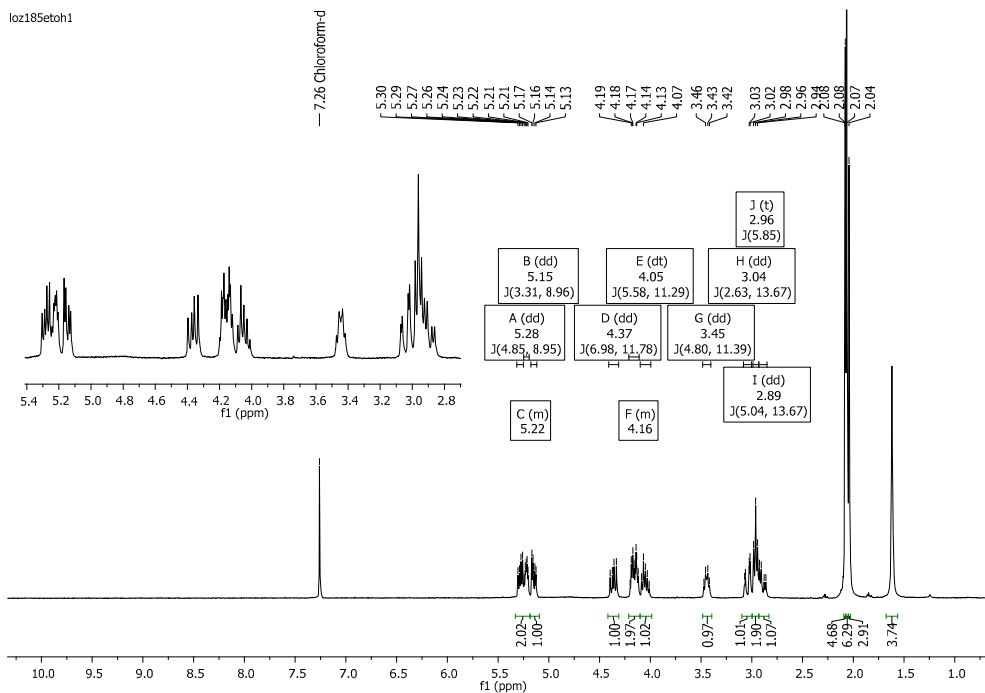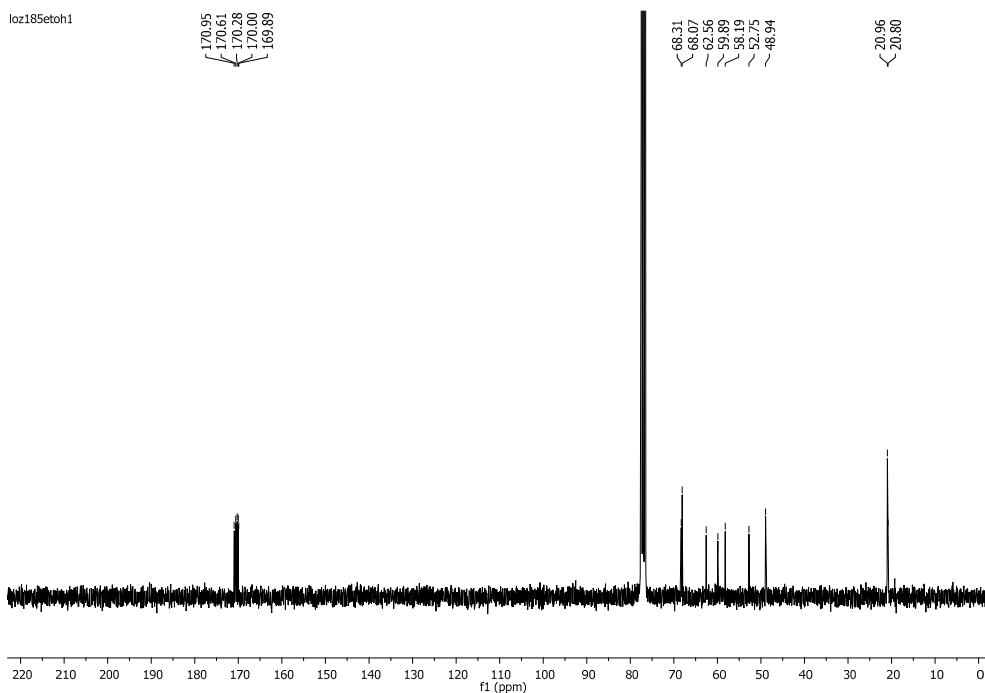

loz185etoh1

68.31  
68.04  
62.56  
59.89  
56.18  
52.75  
48.94  
20.96  
20.81

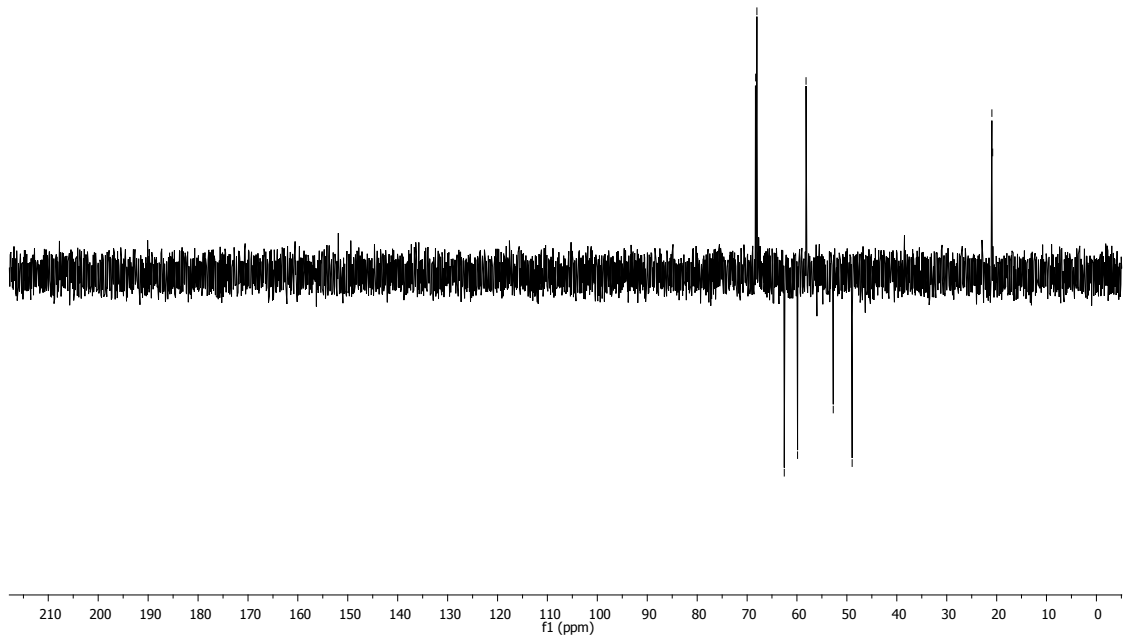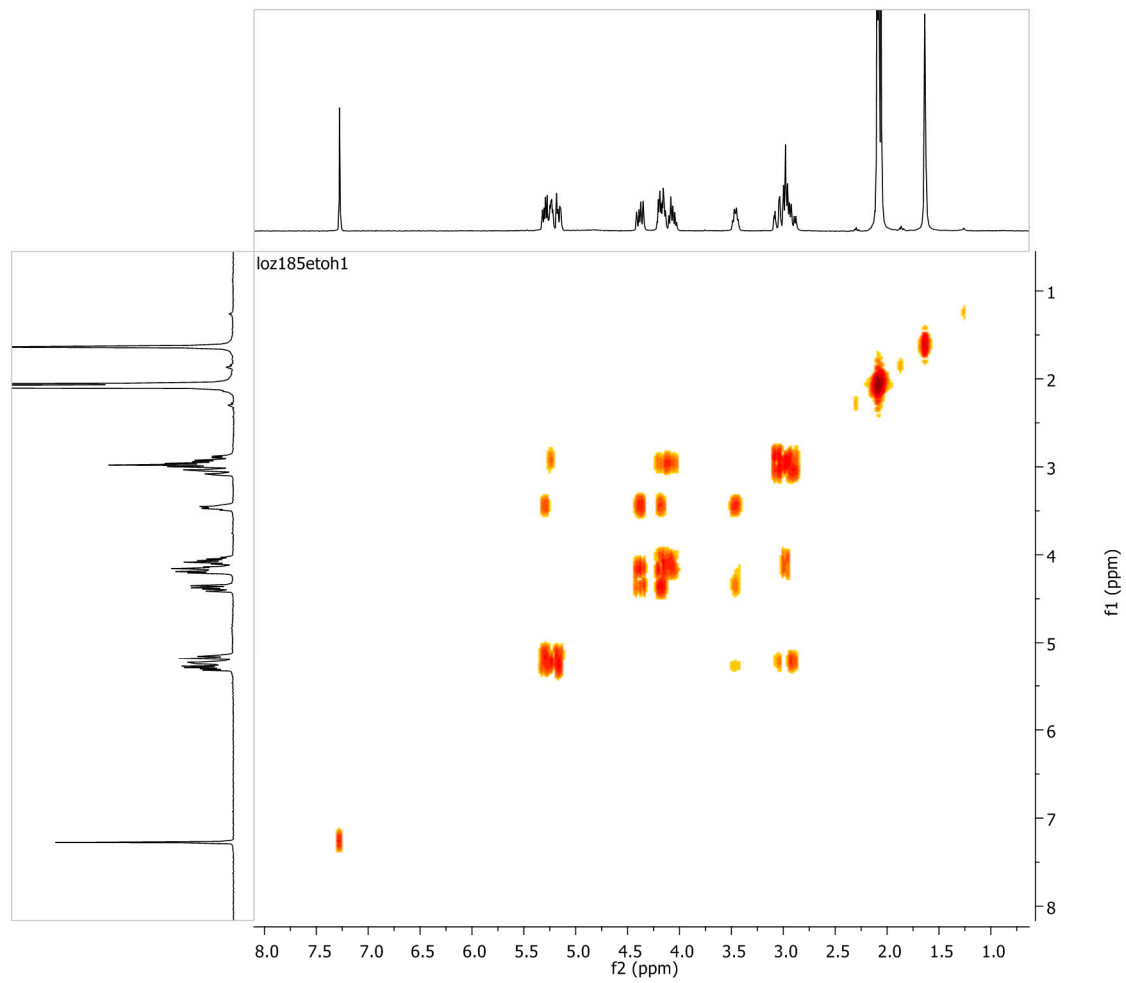

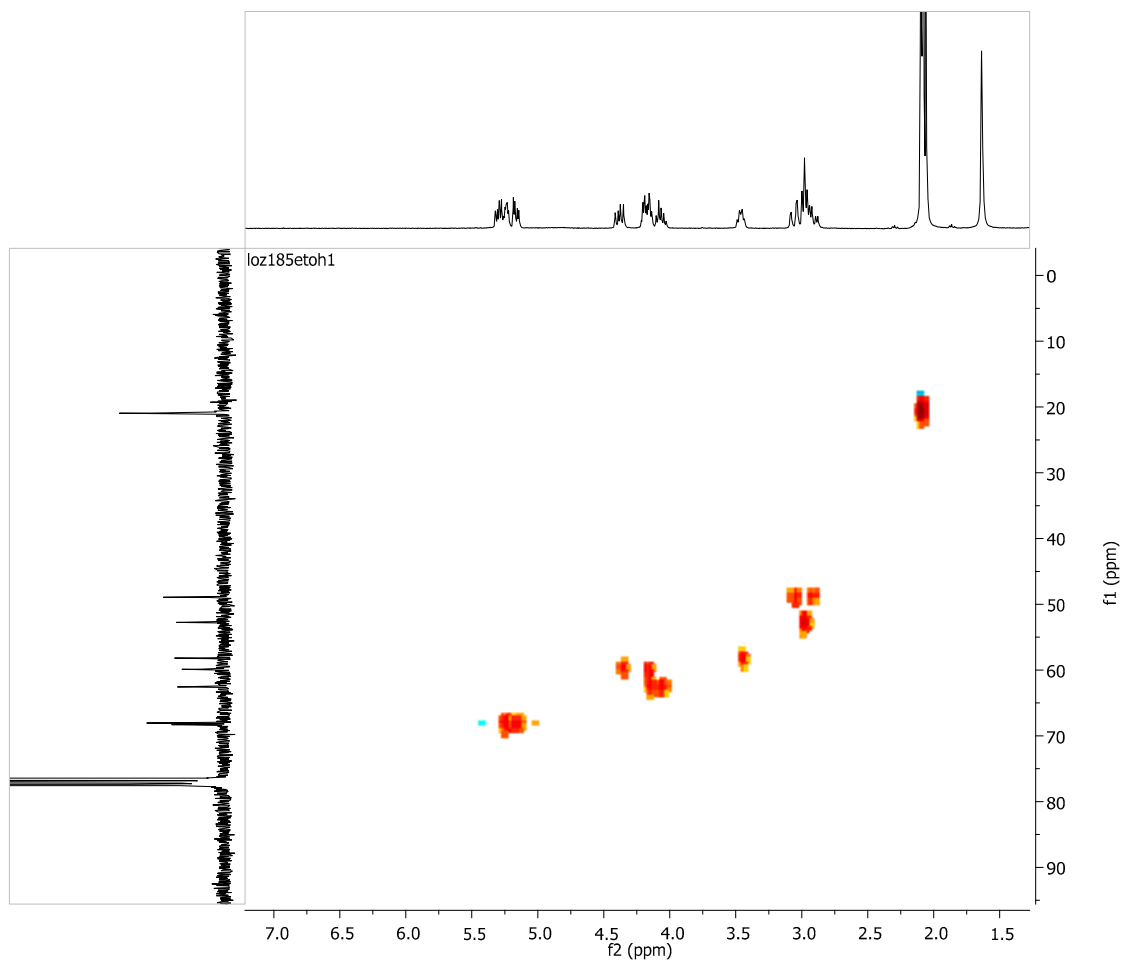

***N*-Acetoxyethyl-2,3,4,6-tetra-*O*-acetyl-1,6-dideoxy-1,6-imino-*D*-mannitol (31b):**

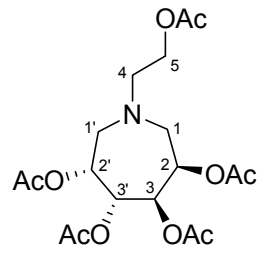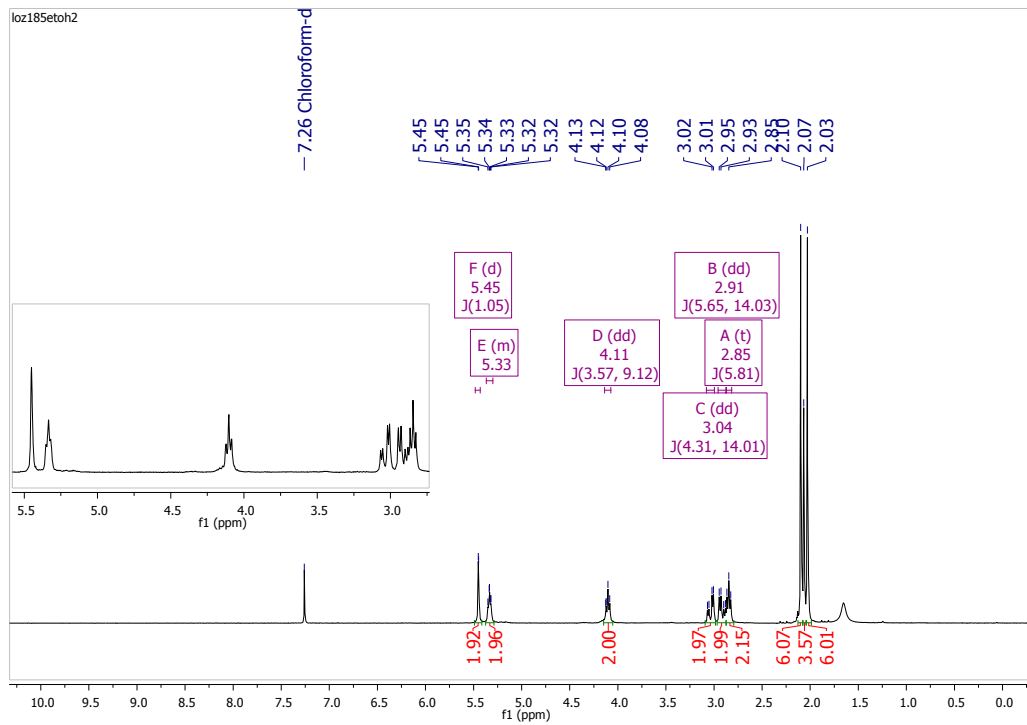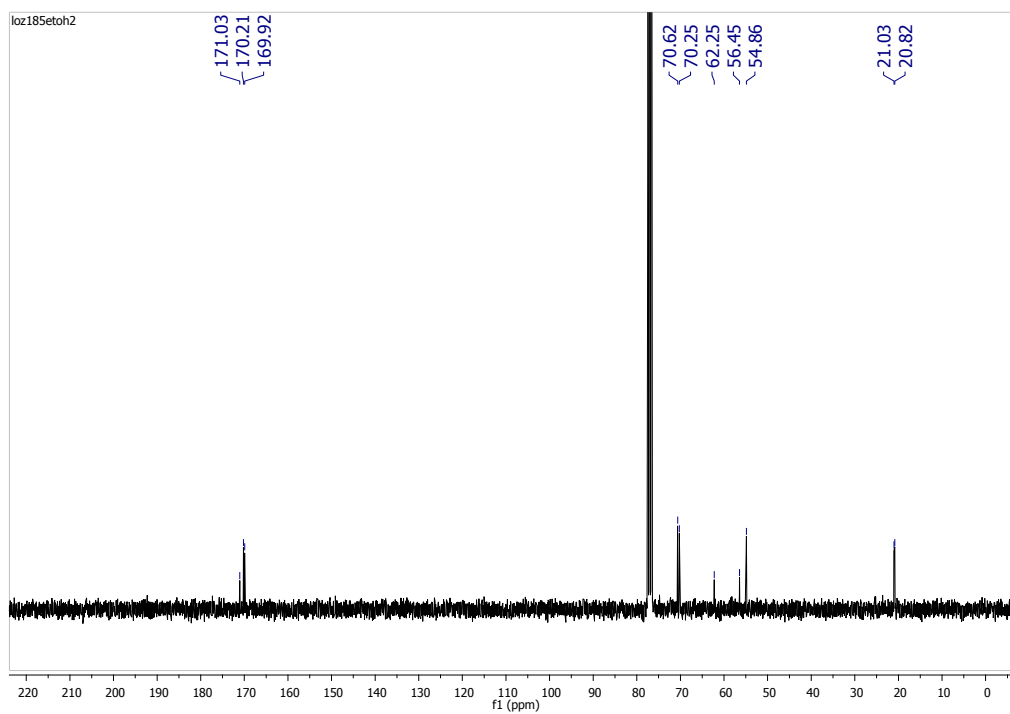

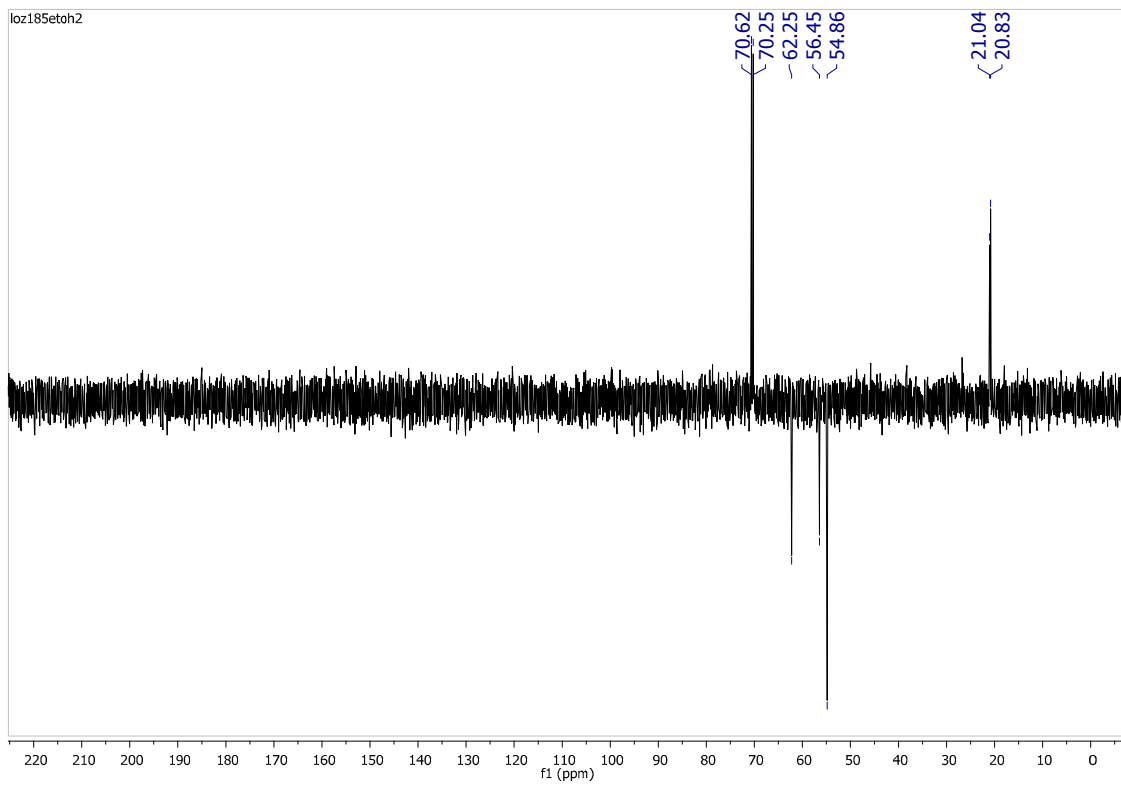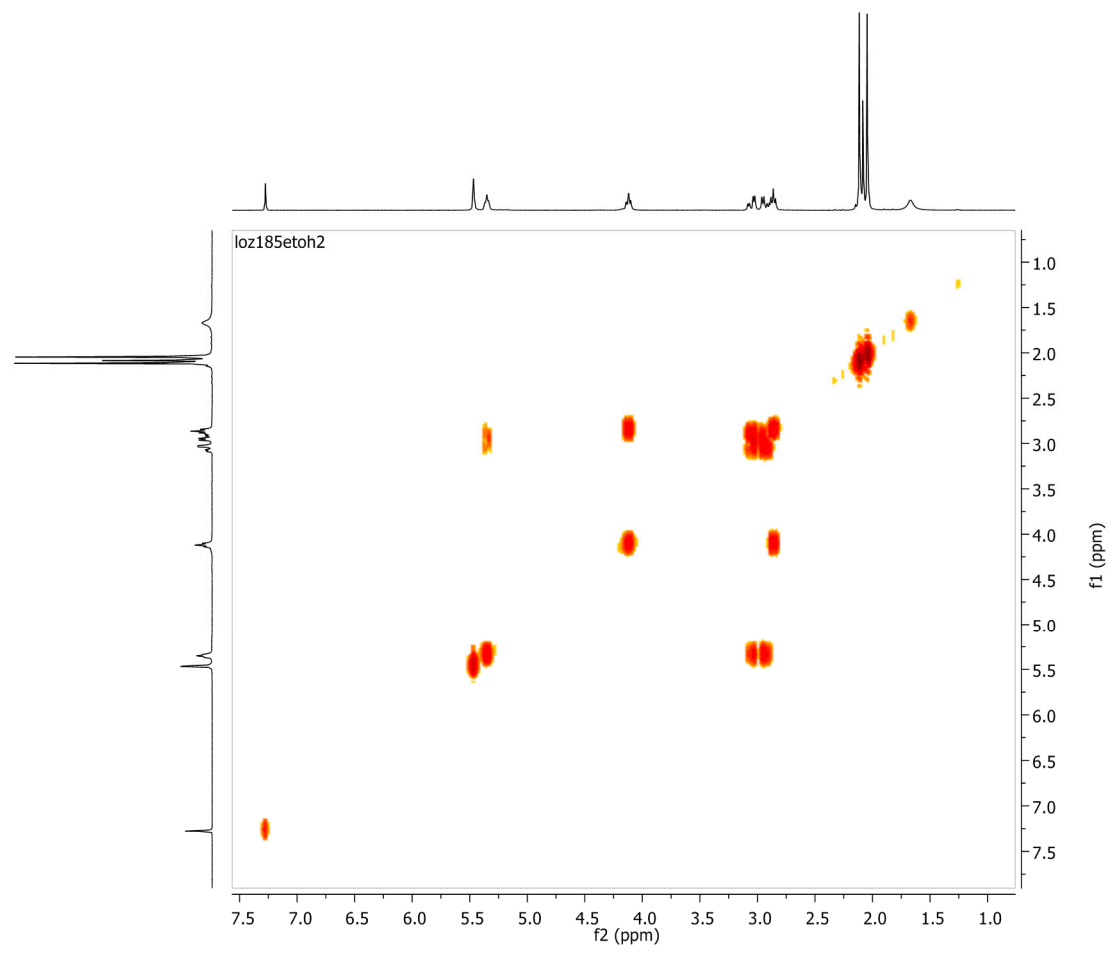

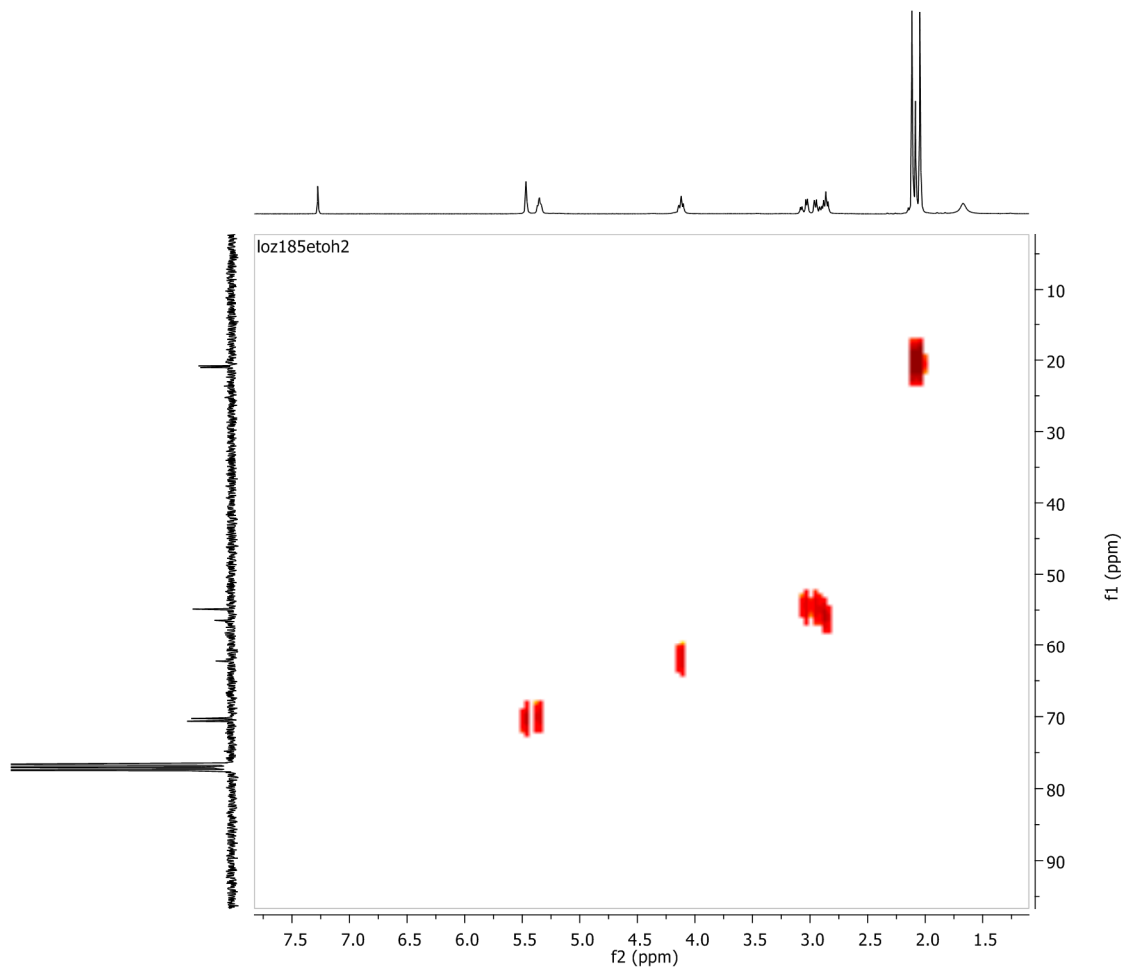

**N-Propynyl-2,3,4,6-tetra-O-acetyl-1,5-dideoxy-1,5-imino-D-glucitol (36a):**

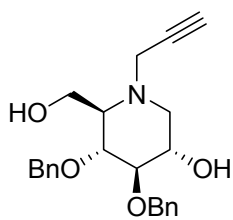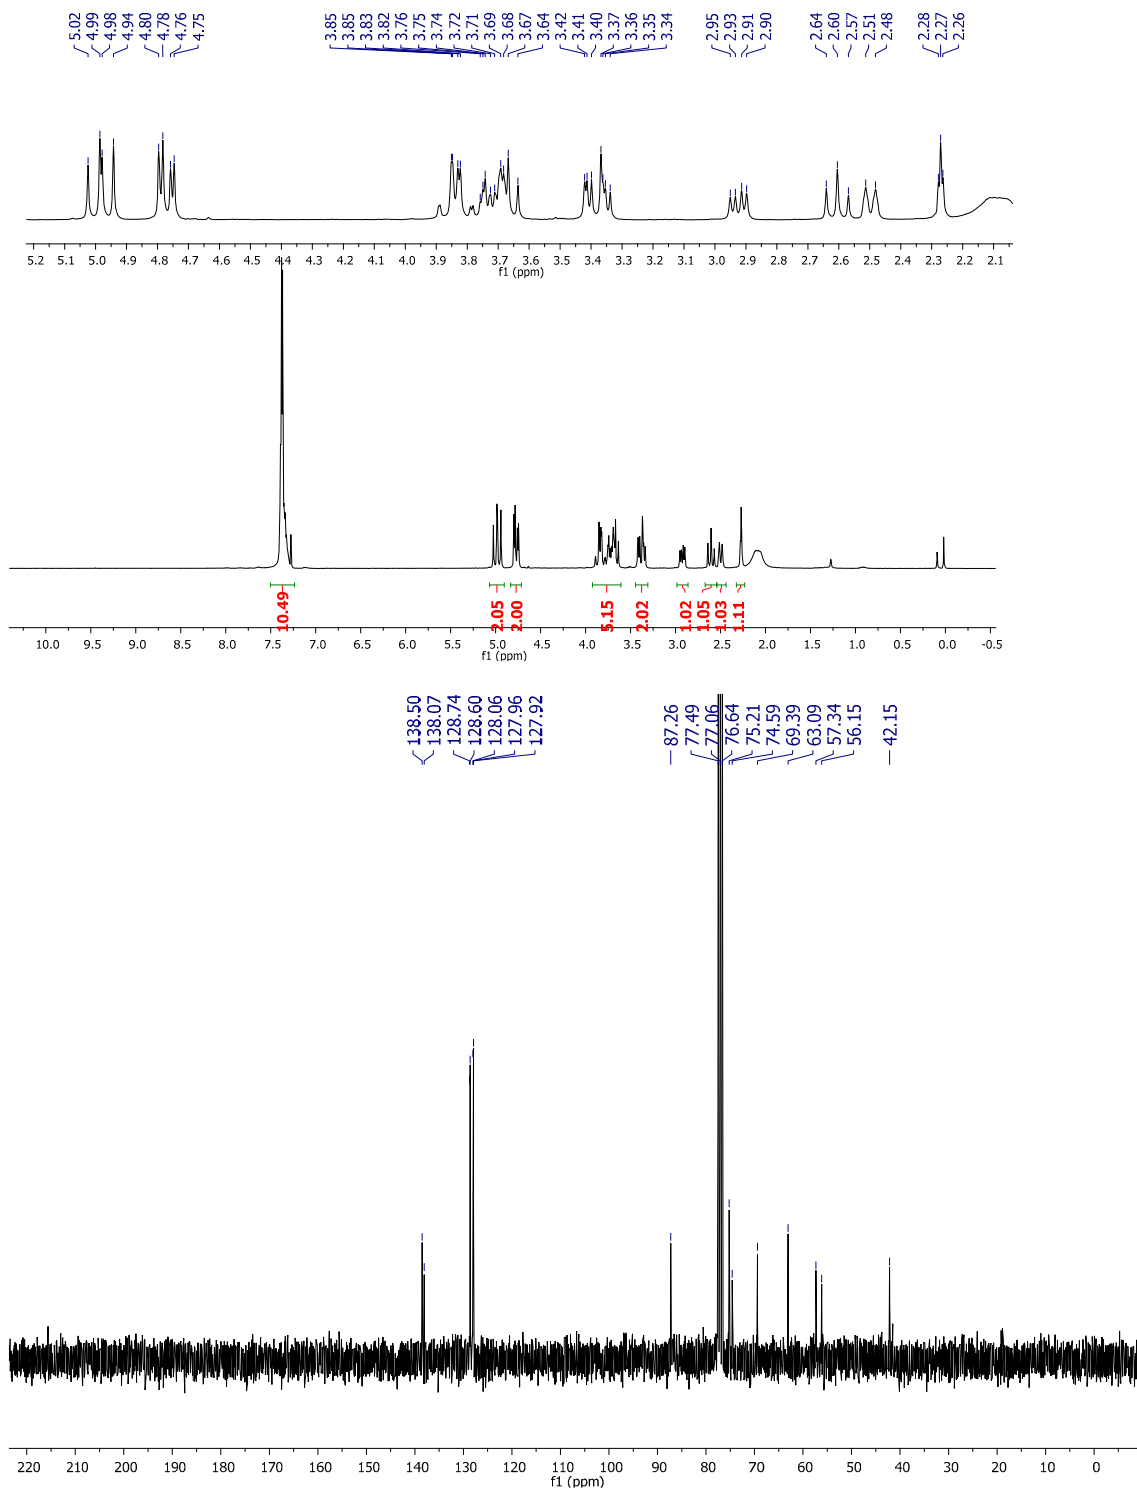

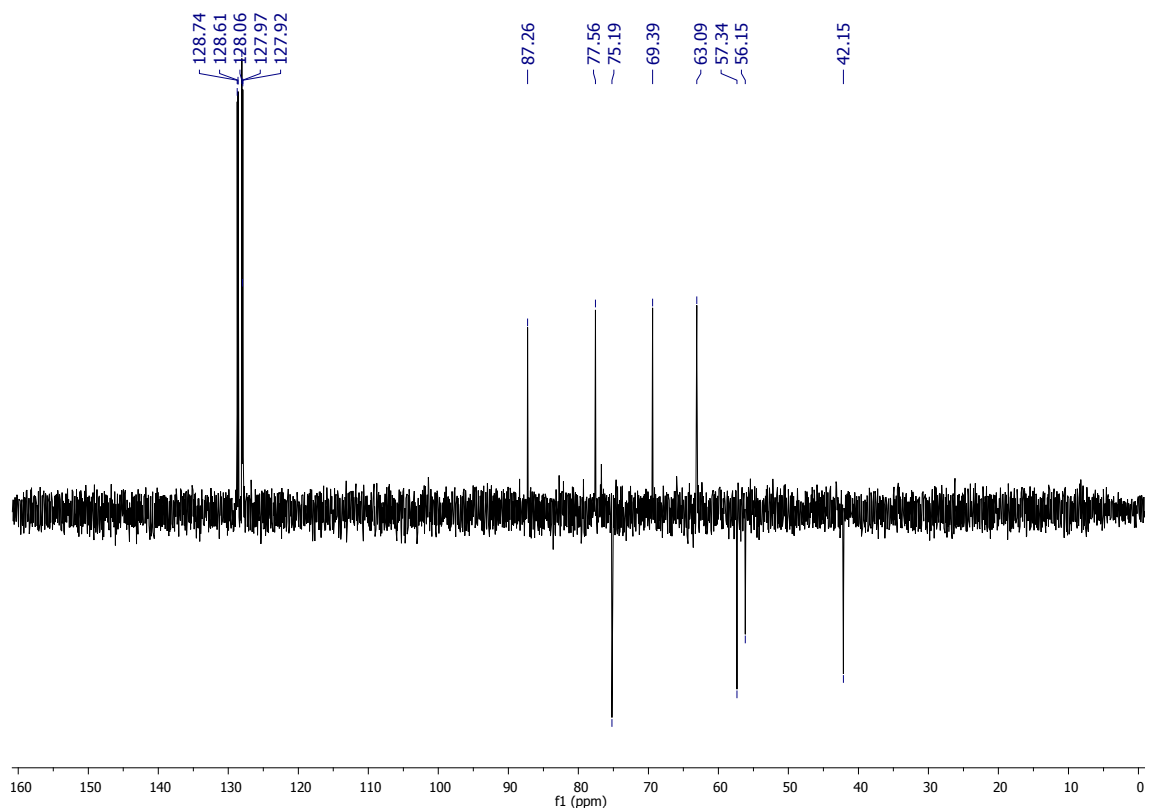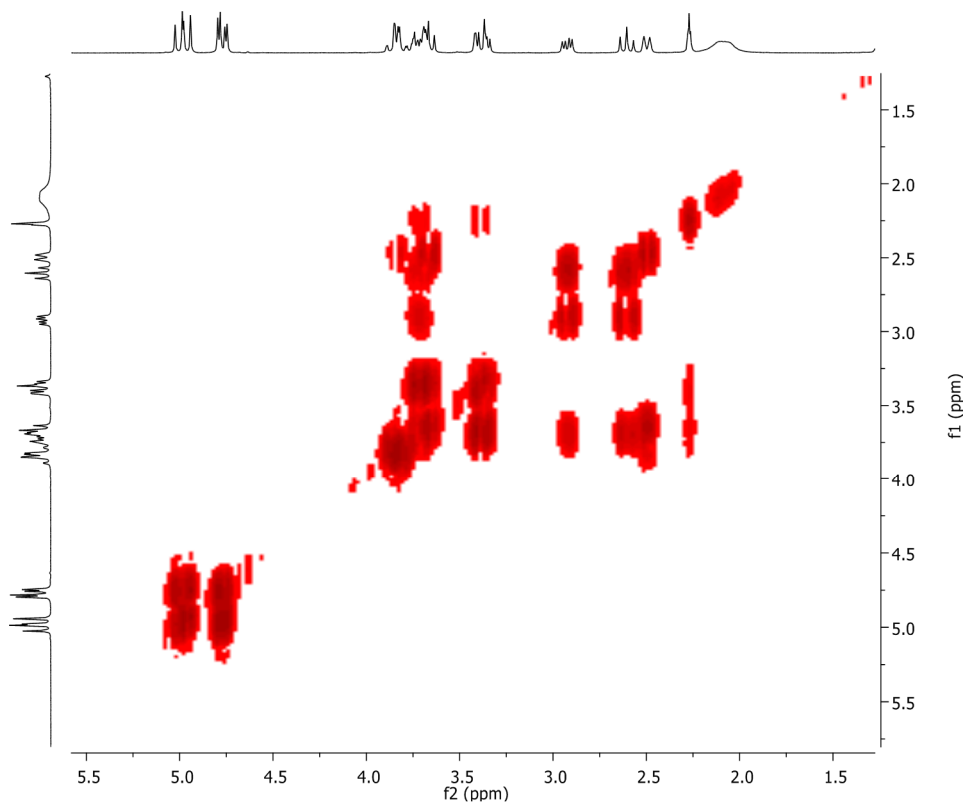



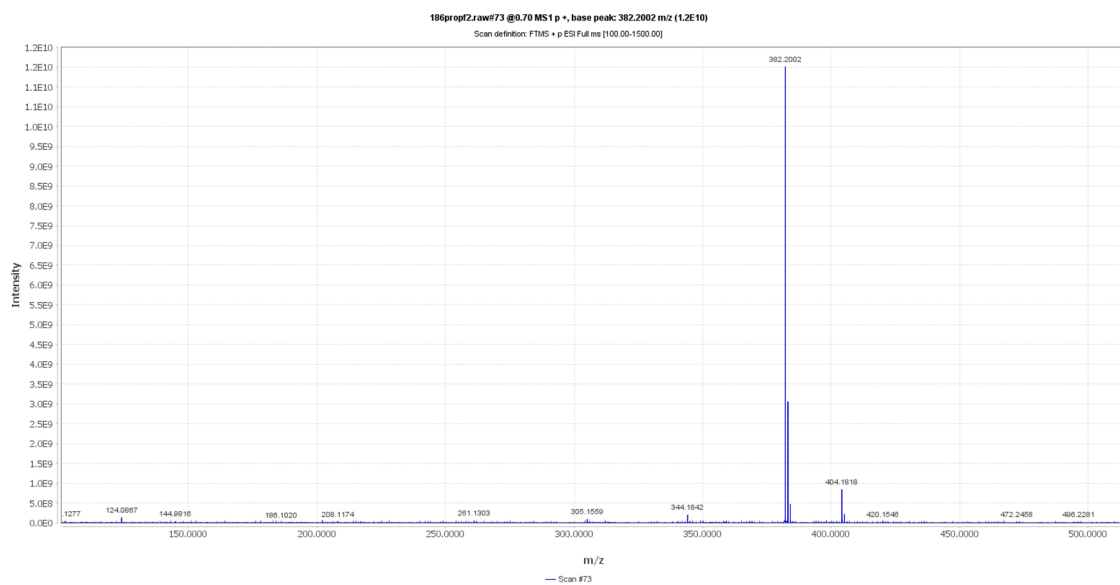

ESI HRMS:  $[M+H]^+$  calcd for  $C_{23}H_{28}NO_4$  382.2013; found 382.2002

**N-Propynyl-2,3,4,6-tetra-O-acetyl-1,6-dideoxy-1,6-imino-L-iditol (36b):**

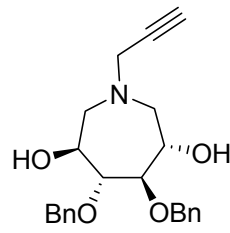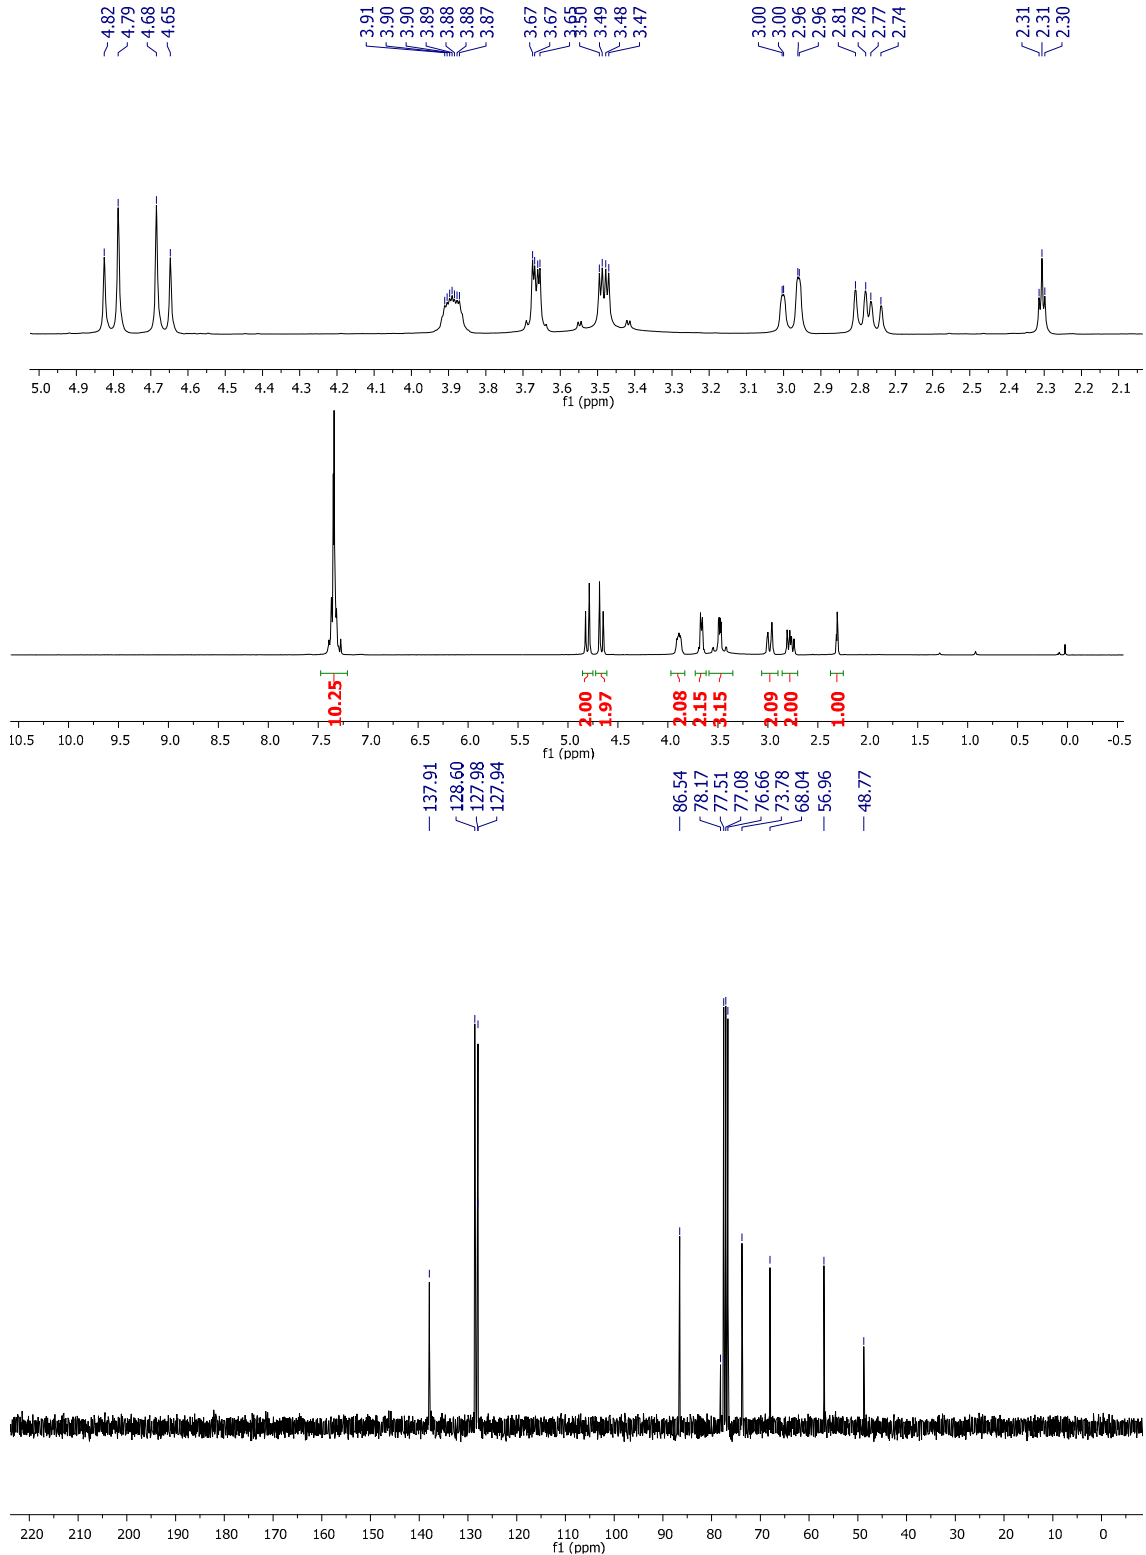

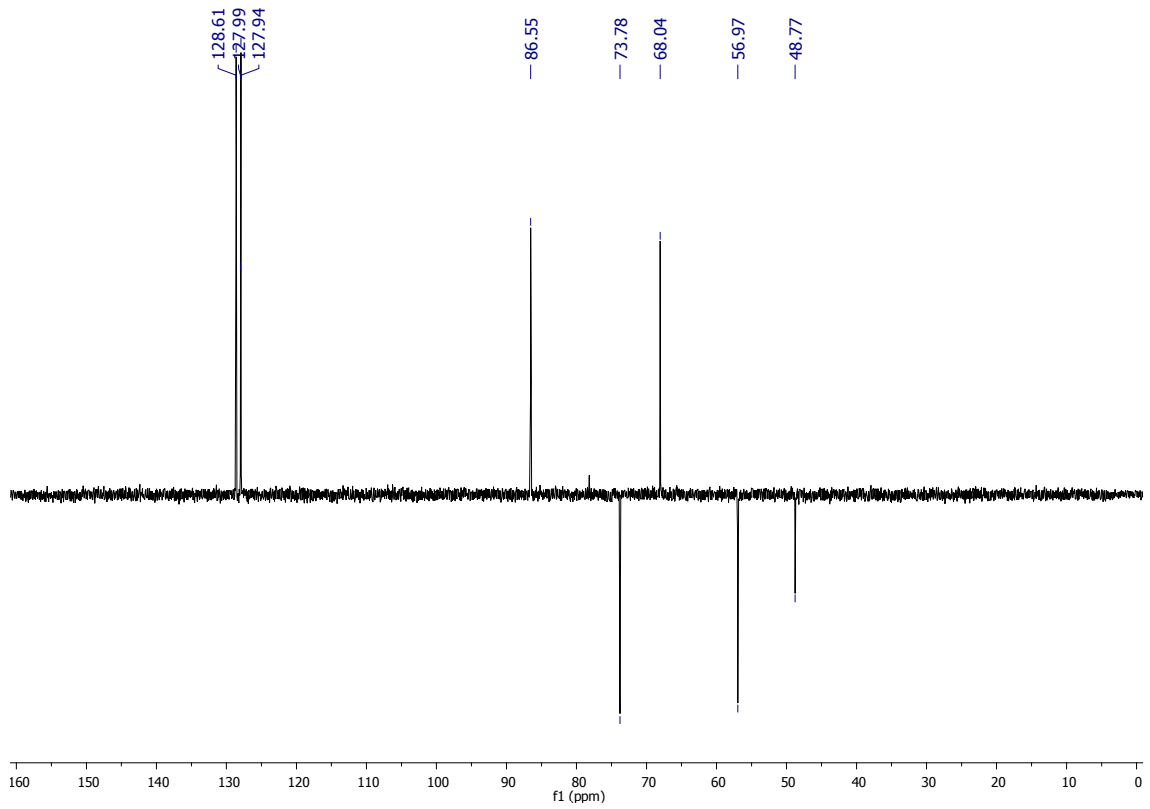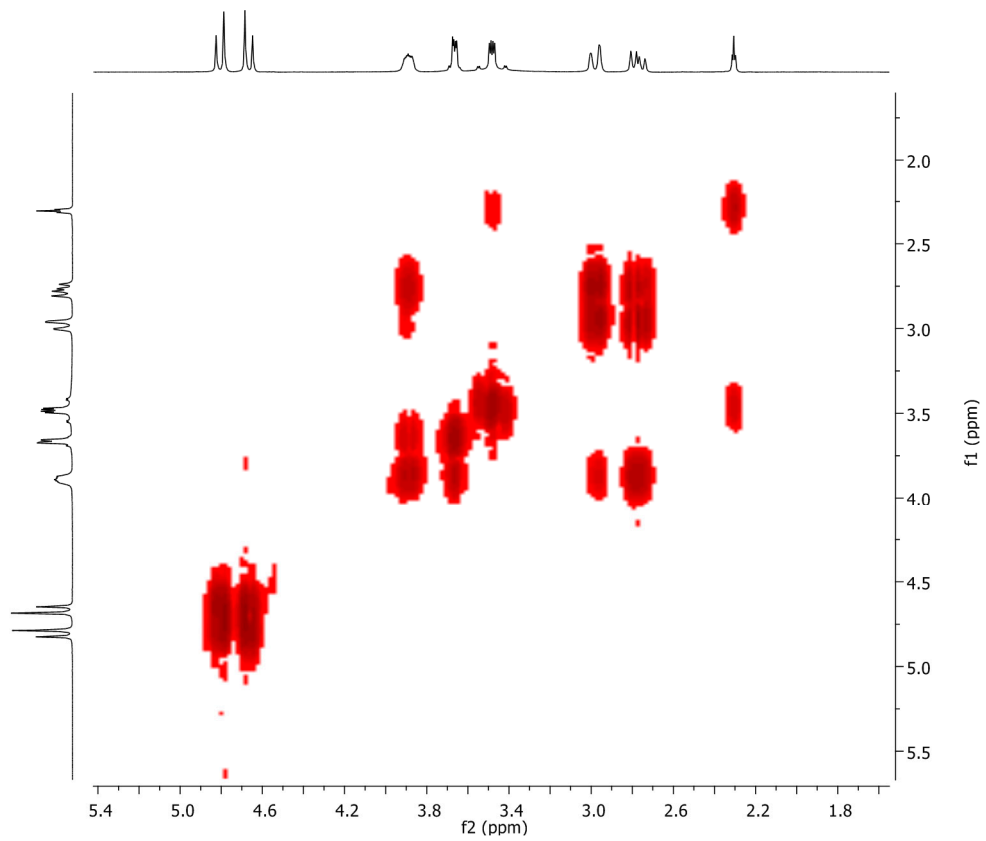

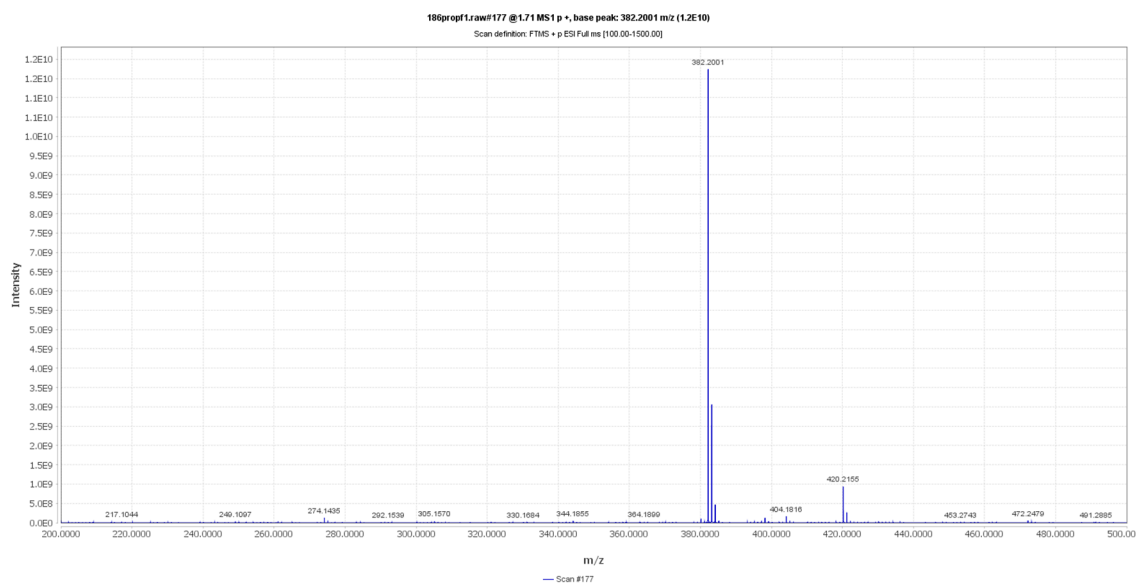

ESI HRMS:  $[M+H]^+$  calcd for  $C_{23}H_{28}NO_4$  382.2013; found 382.2001

***N*-Butyl-2,3,4,6-tetra-*O*-acetyl-1,5-dideoxy-1,5-imino-D-glucitol (37a):**

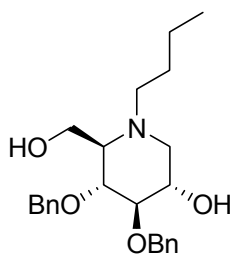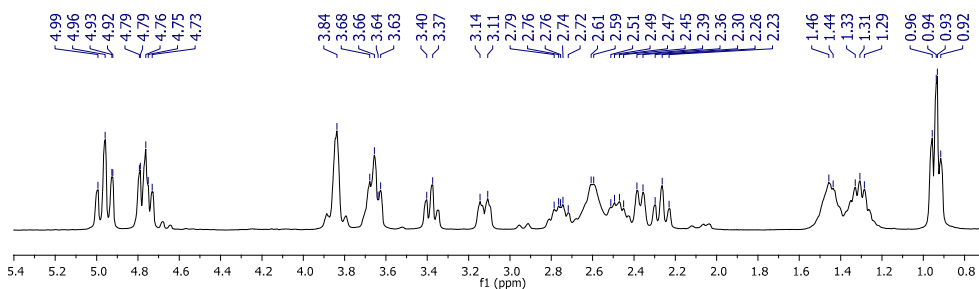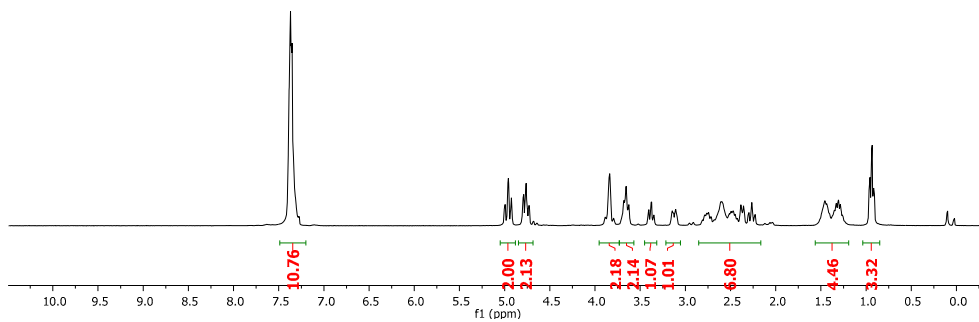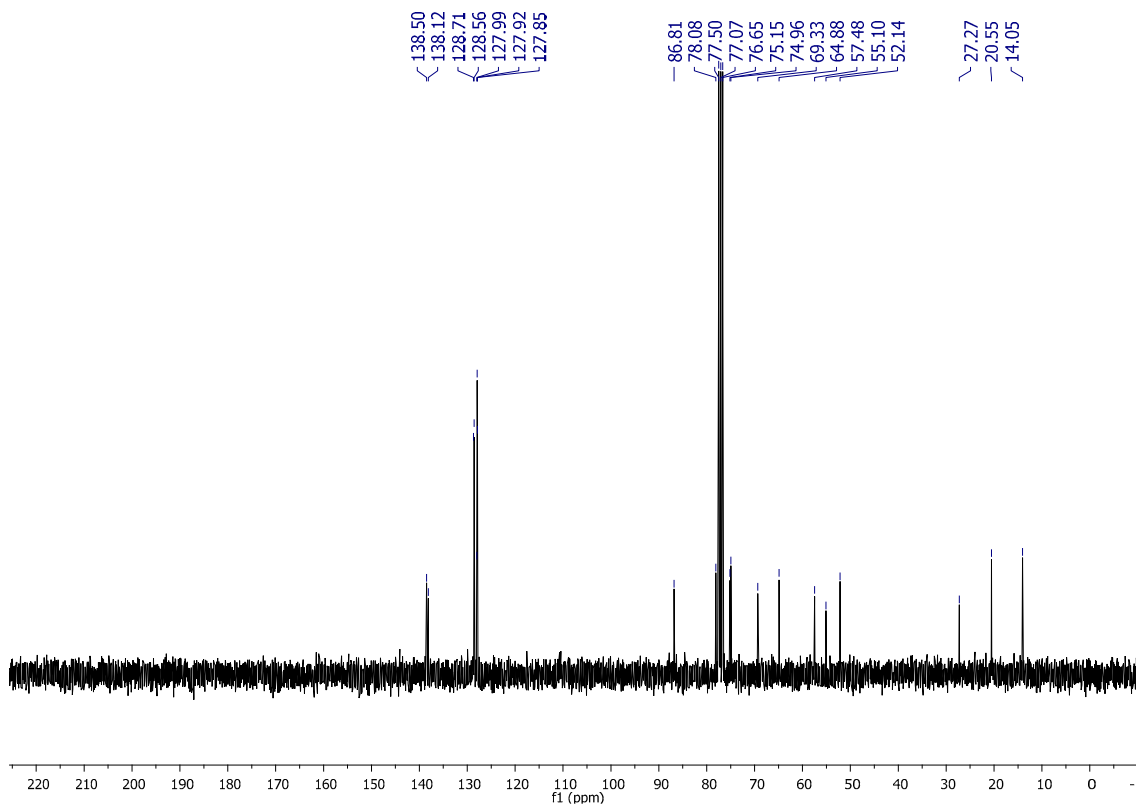

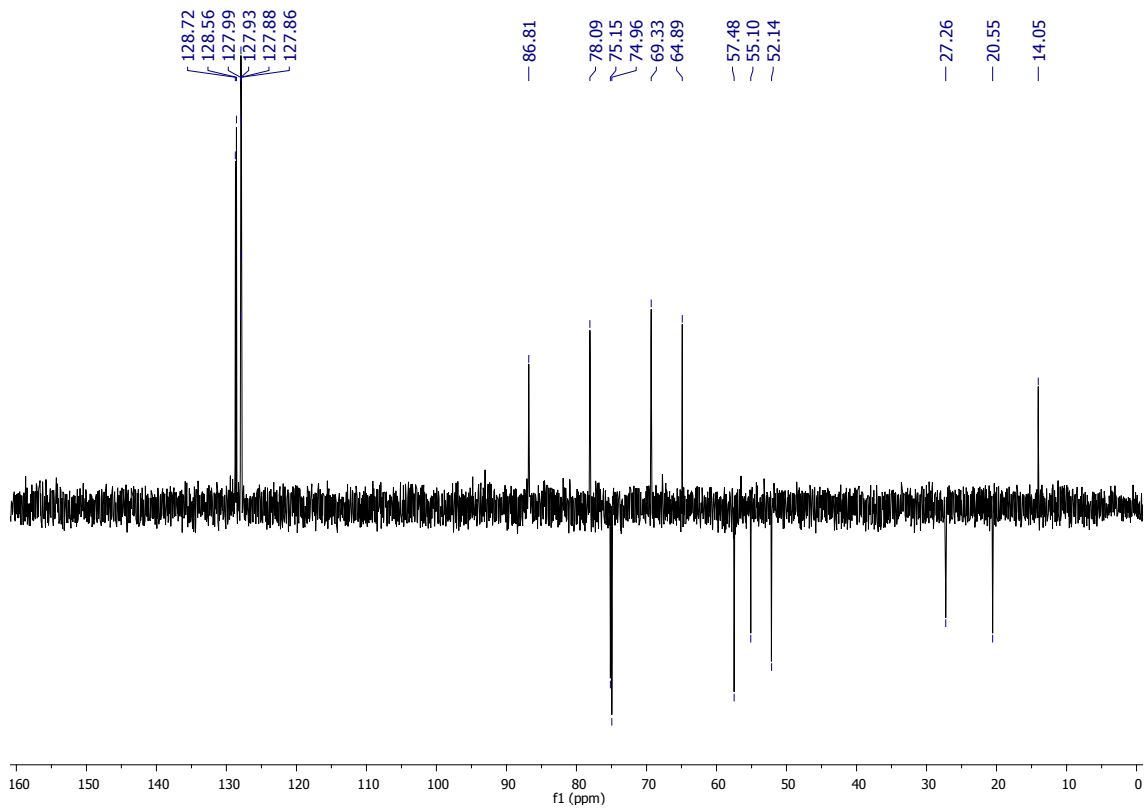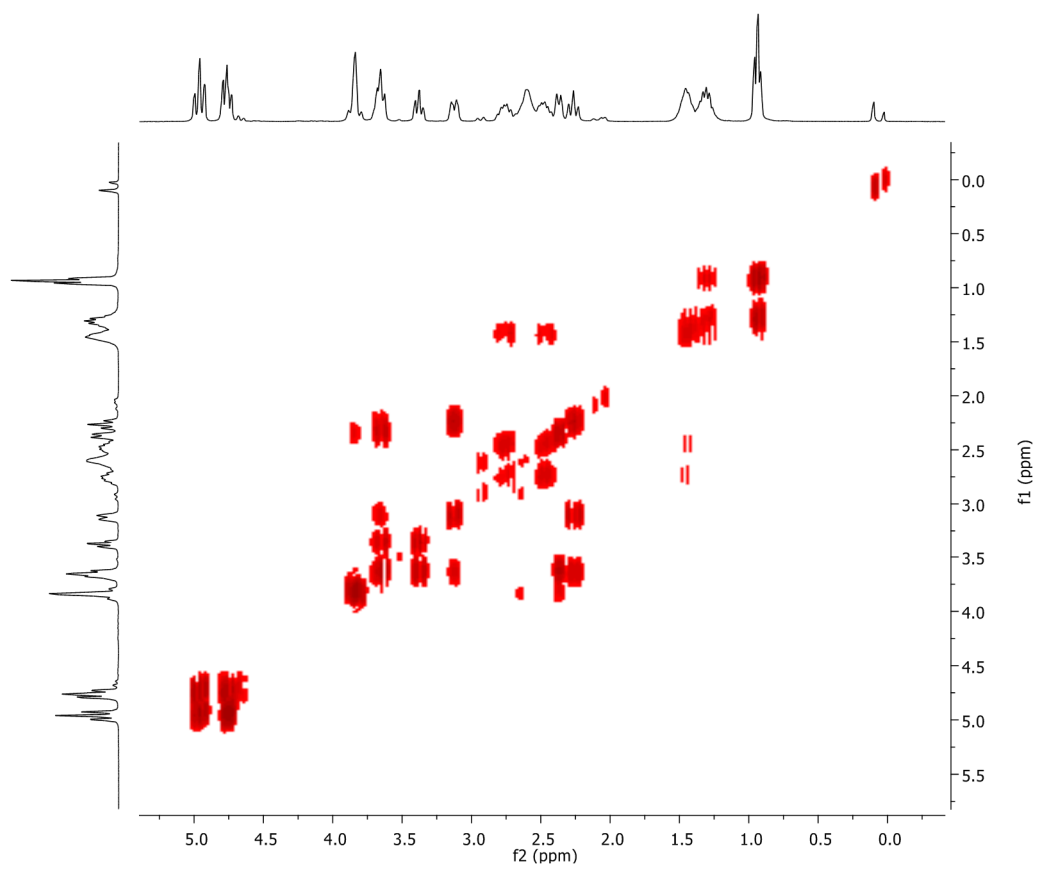

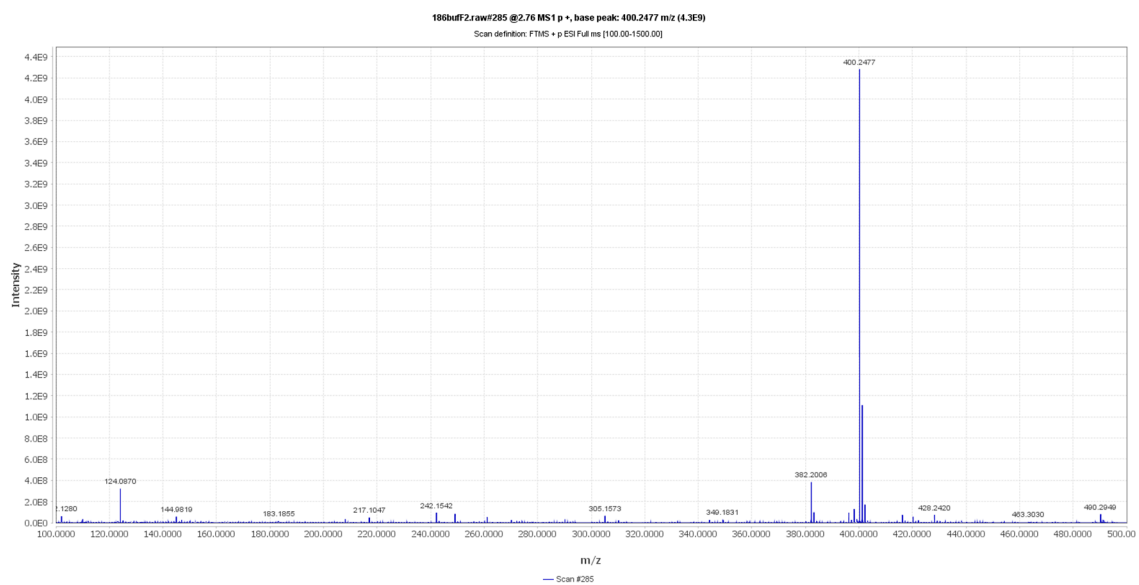

ESI HRMS:  $[M+H]^+$  calcd for  $C_{24}H_{34}NO_4$  400.2483; found 400.2477

***N*-Butyl-2,3,4,6-tetra-*O*-acetyl-1,6-dideoxy-1,6-imino-L-iditol (37b):**

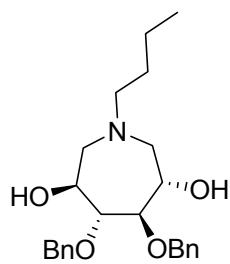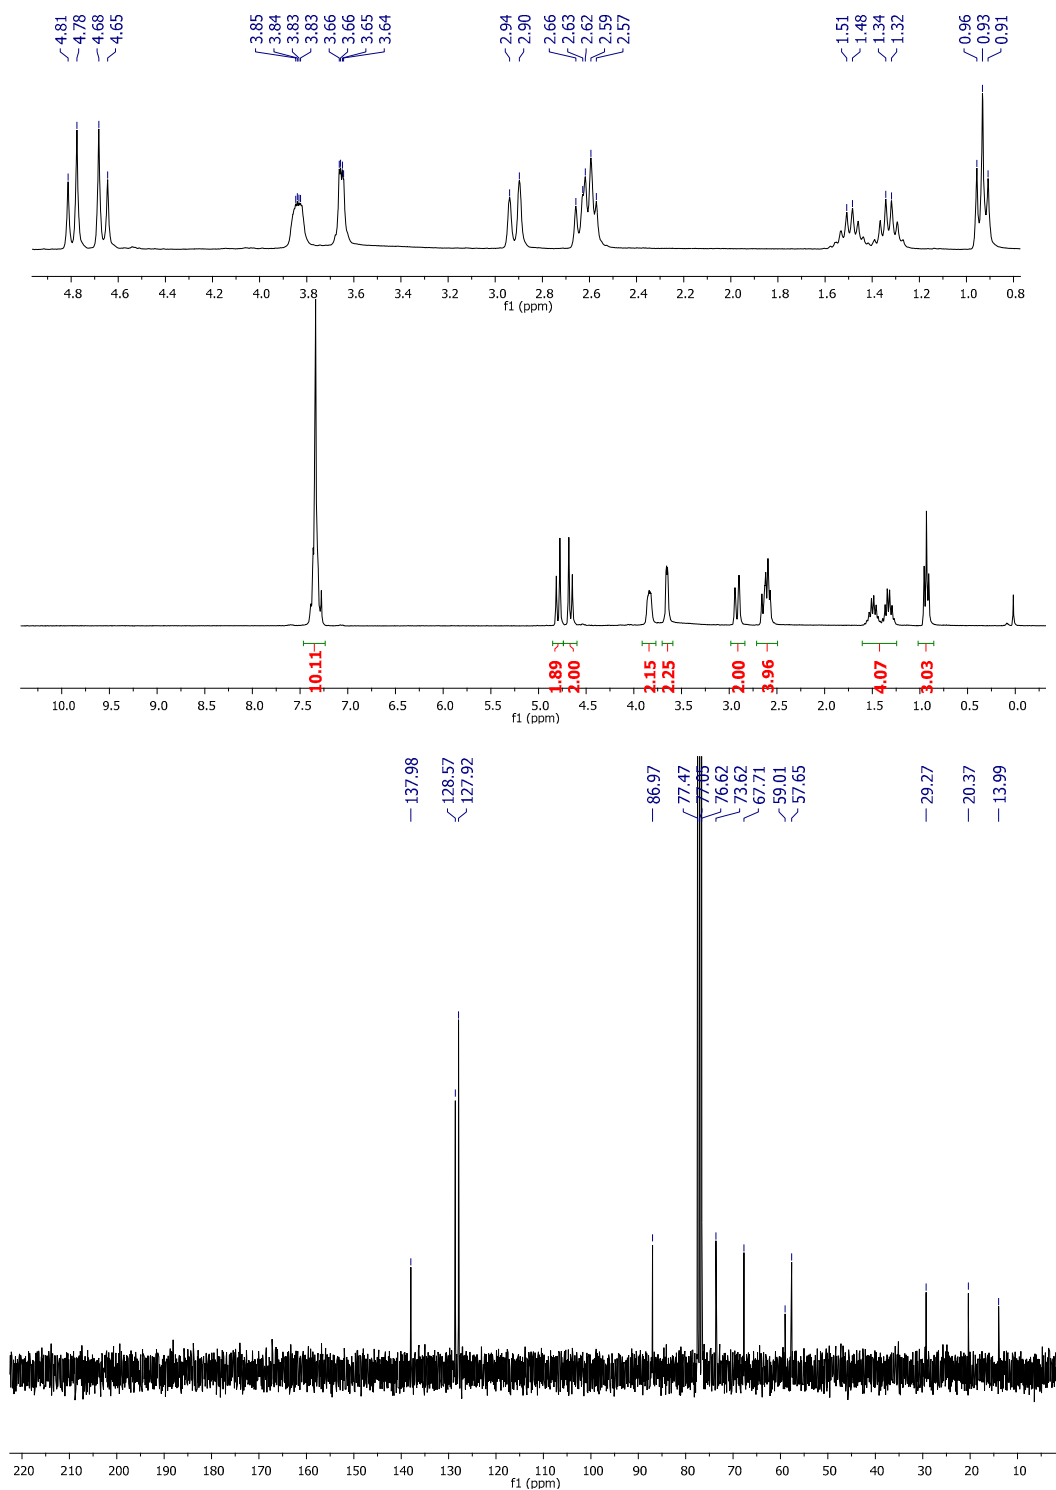



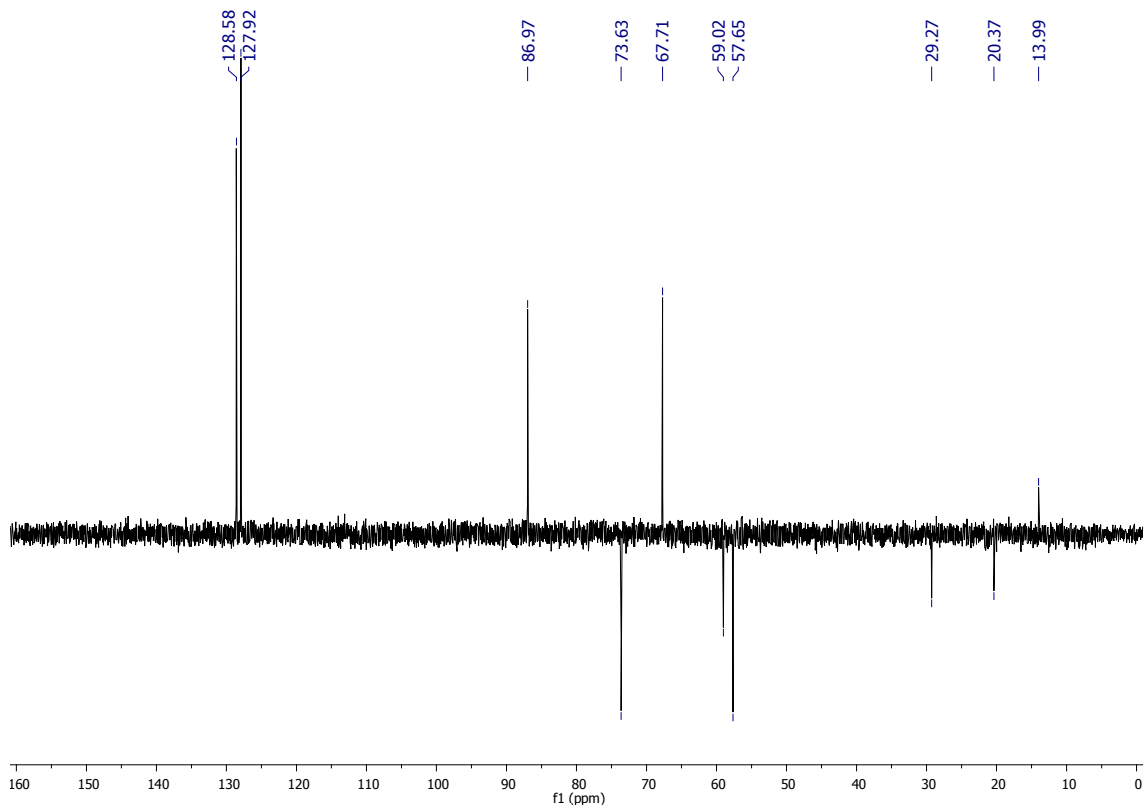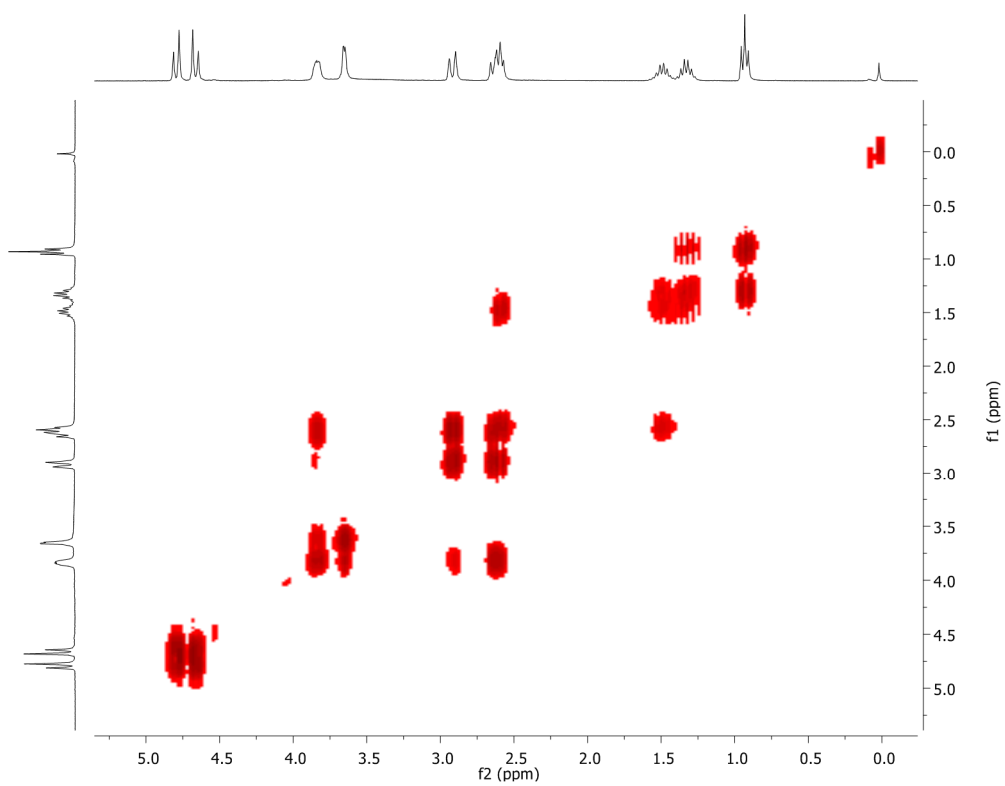

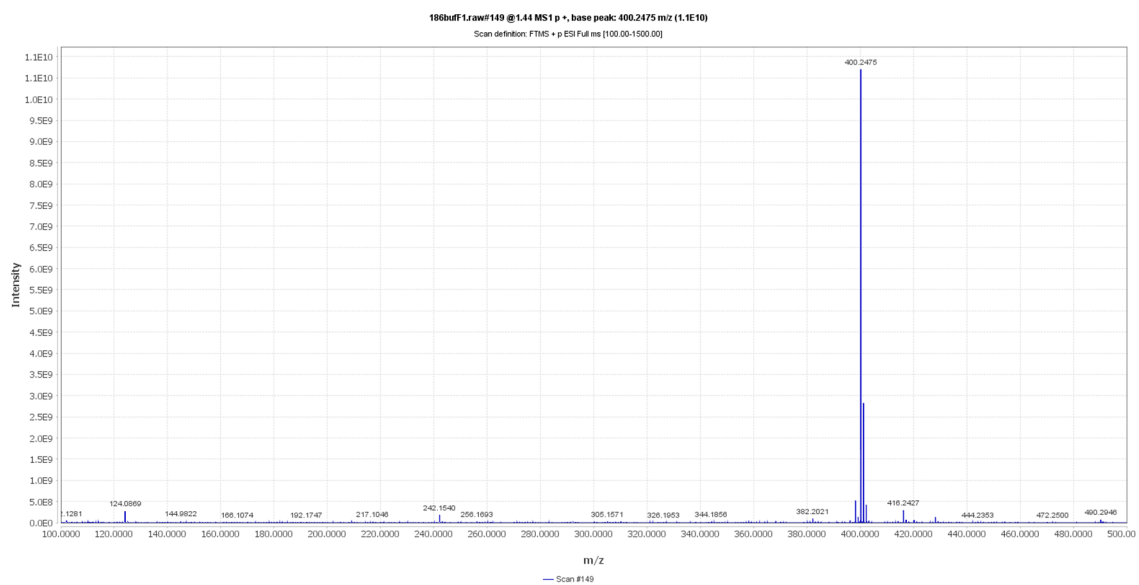

ESI HRMS:  $[M+H]^+$  calcd for  $C_{24}H_{34}NO_4$  400.2483; found 400.2475

***N*-Hydroxyethyl-2,3,4,6-tetra-*O*-acetyl-1,5-dideoxy-1,5-imino-D-glucitol (38a):**

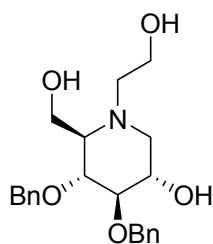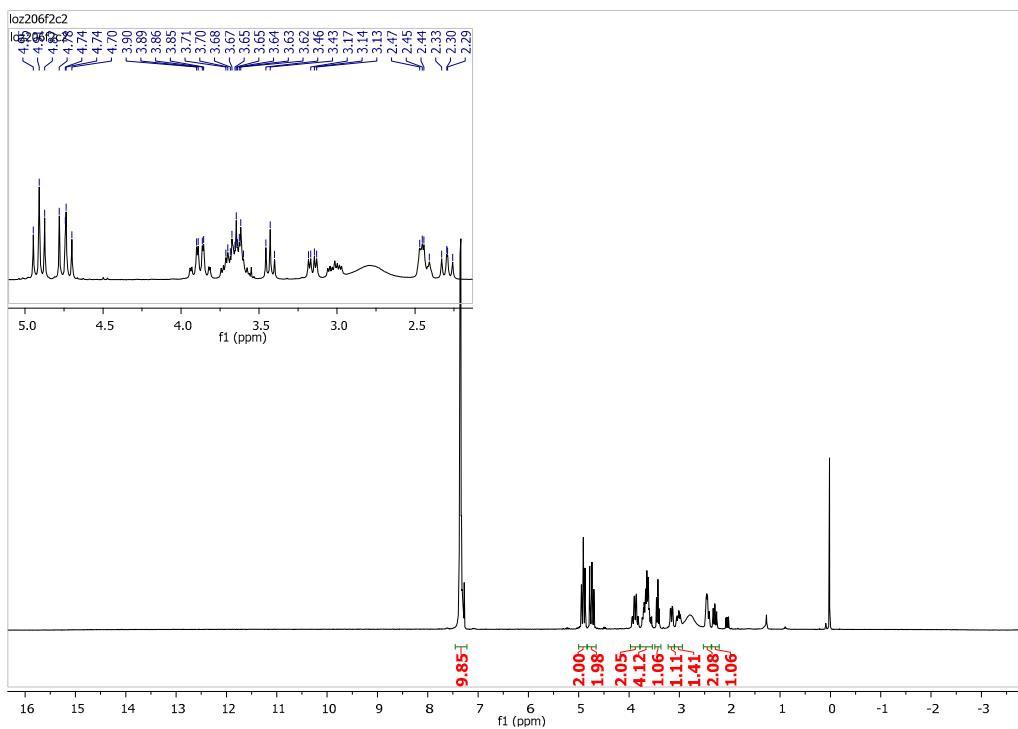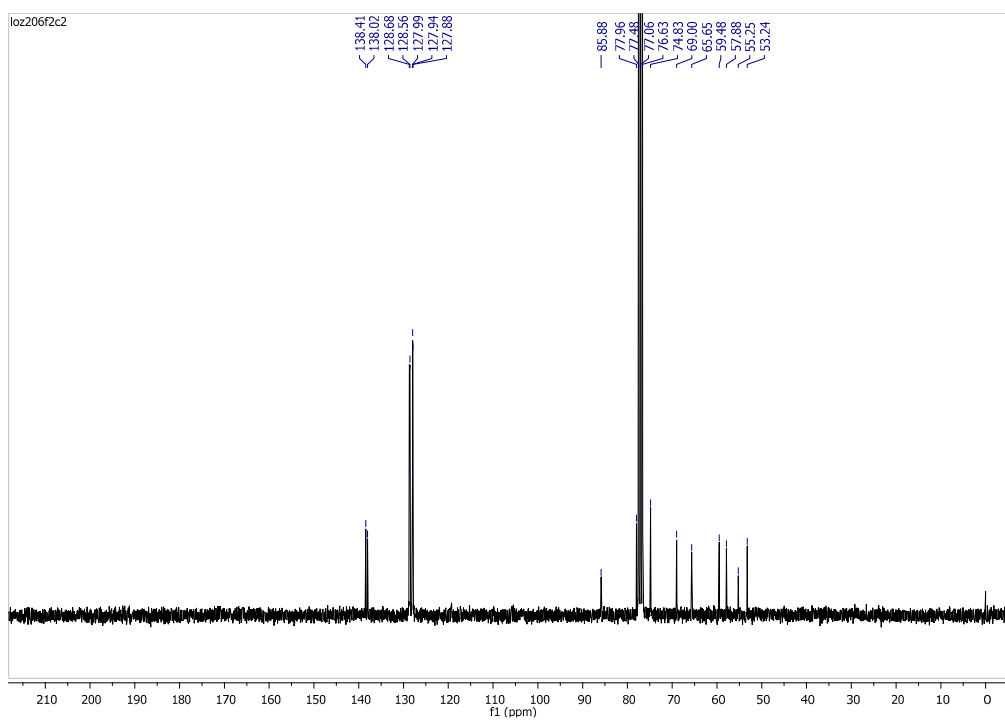

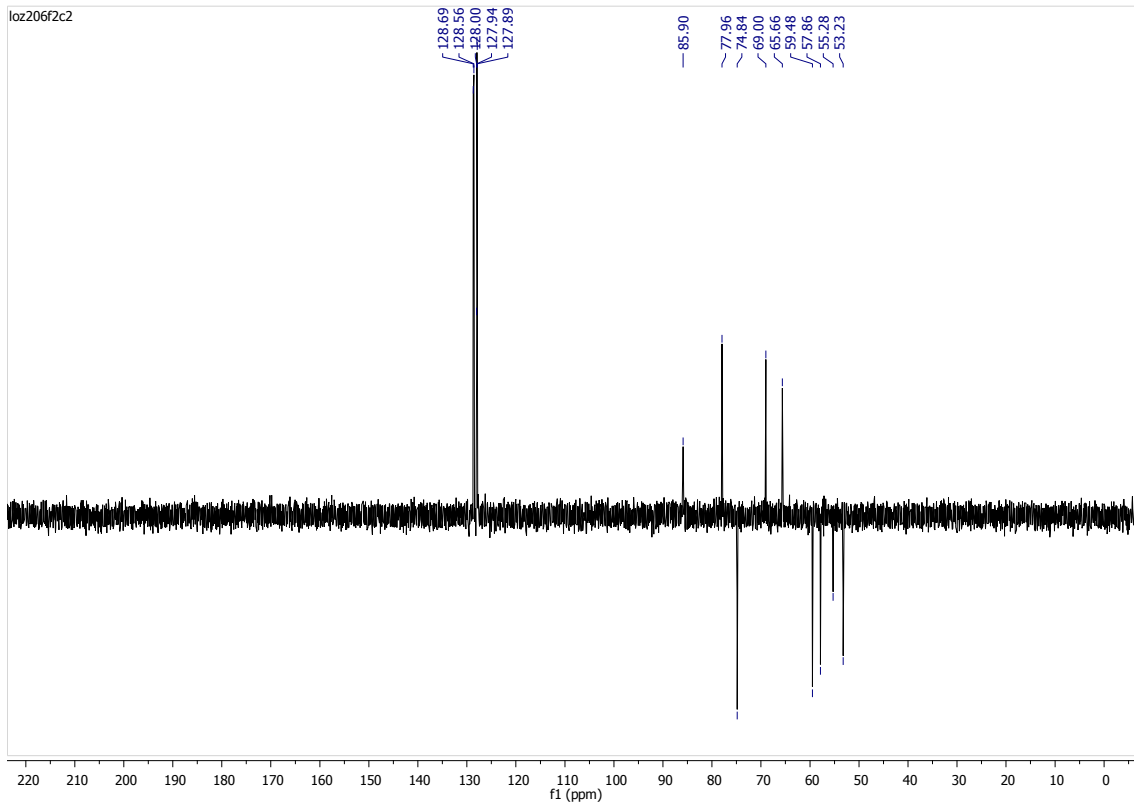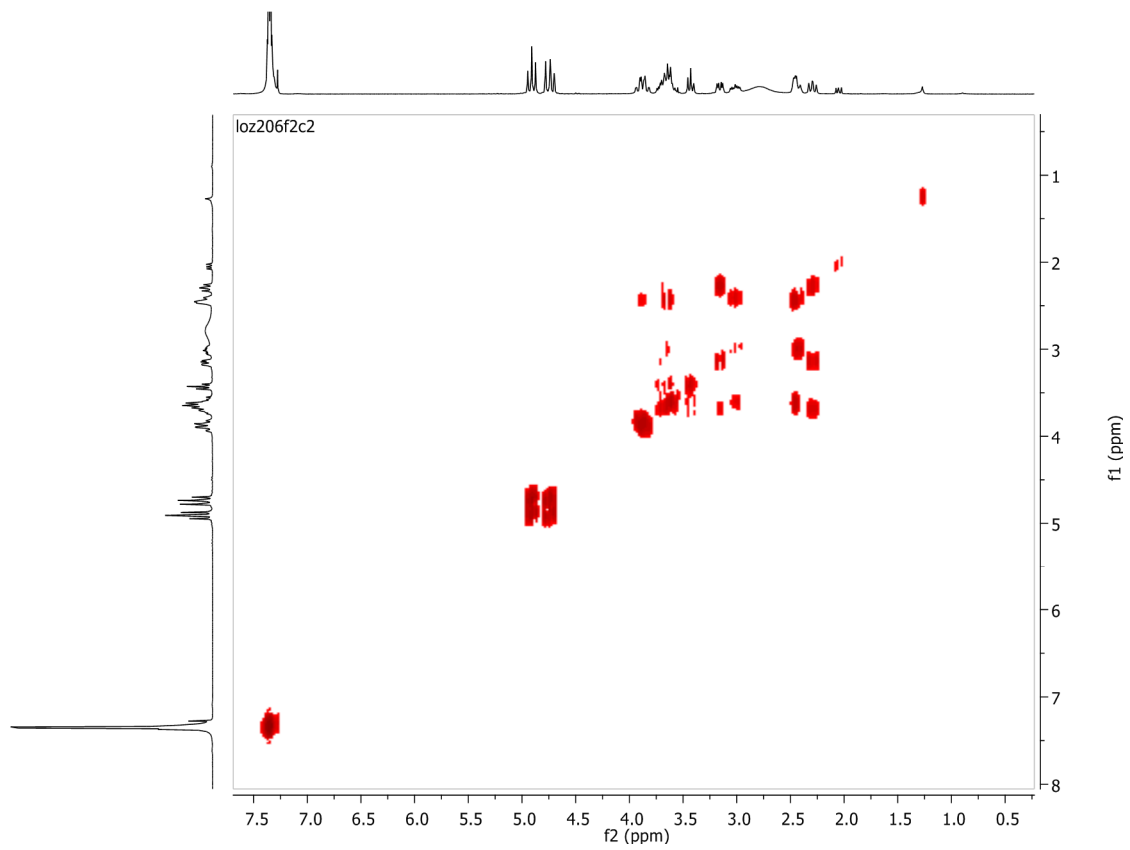

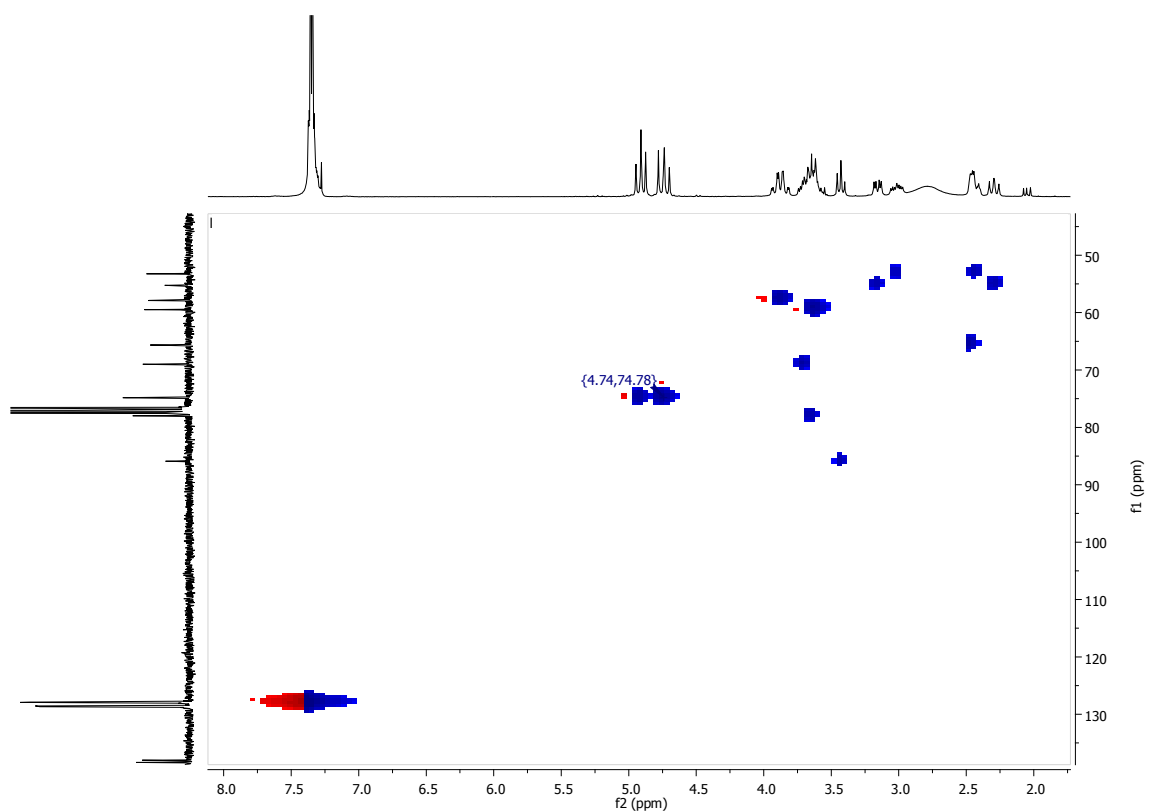

206f2.row#45 @0.43 MS1 p +, base peak: 388.2120 m/z (2.6E10)  
Scan definition: FTMS + p ESI Full ms (100.00-1500.00)

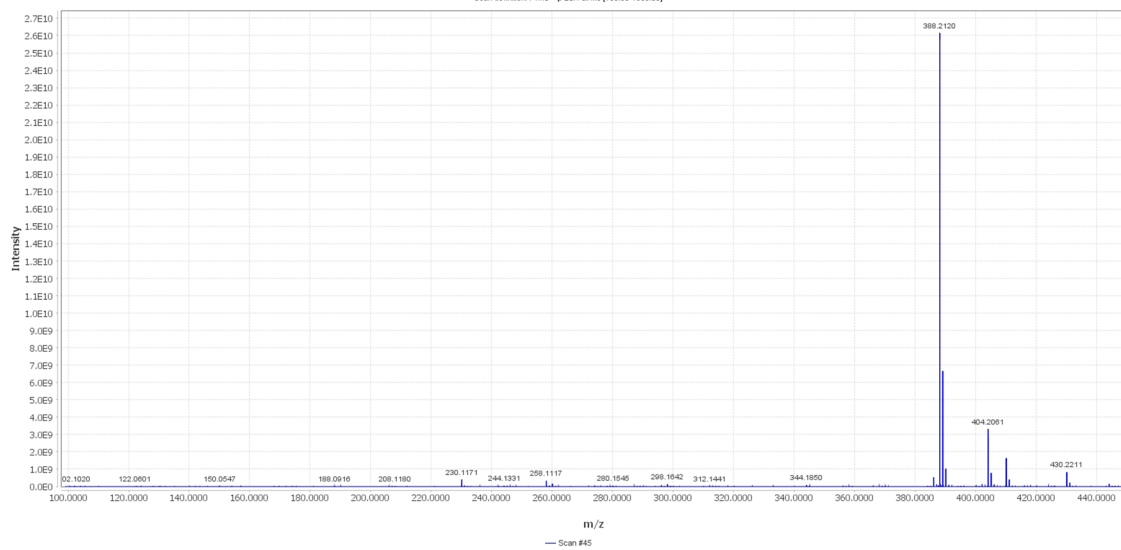

ESI HRMS: [M+H]<sup>+</sup> calcd for C<sub>22</sub>H<sub>30</sub>NO<sub>5</sub> 388.2119; found 388.2120

***N*-Hydroxyethyl-2,3,4,6-tetra-*O*-acetyl-1,6-dideoxy-1,6-imino-L-iditol (38b):**

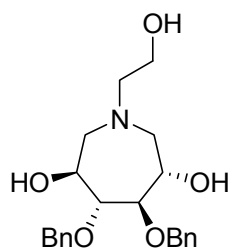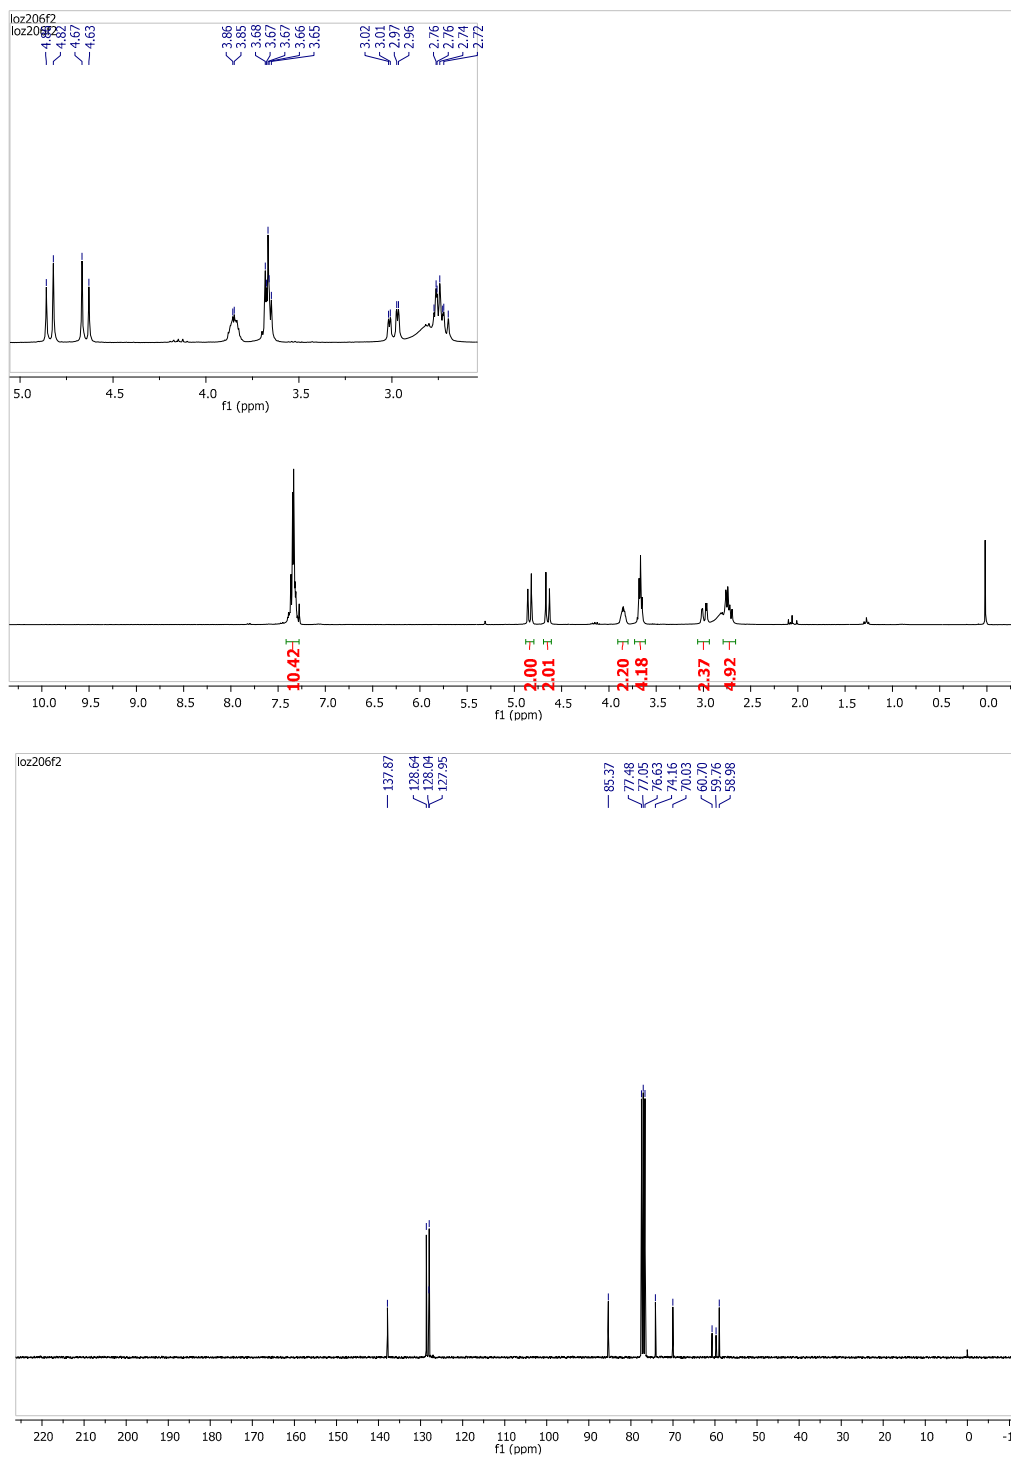

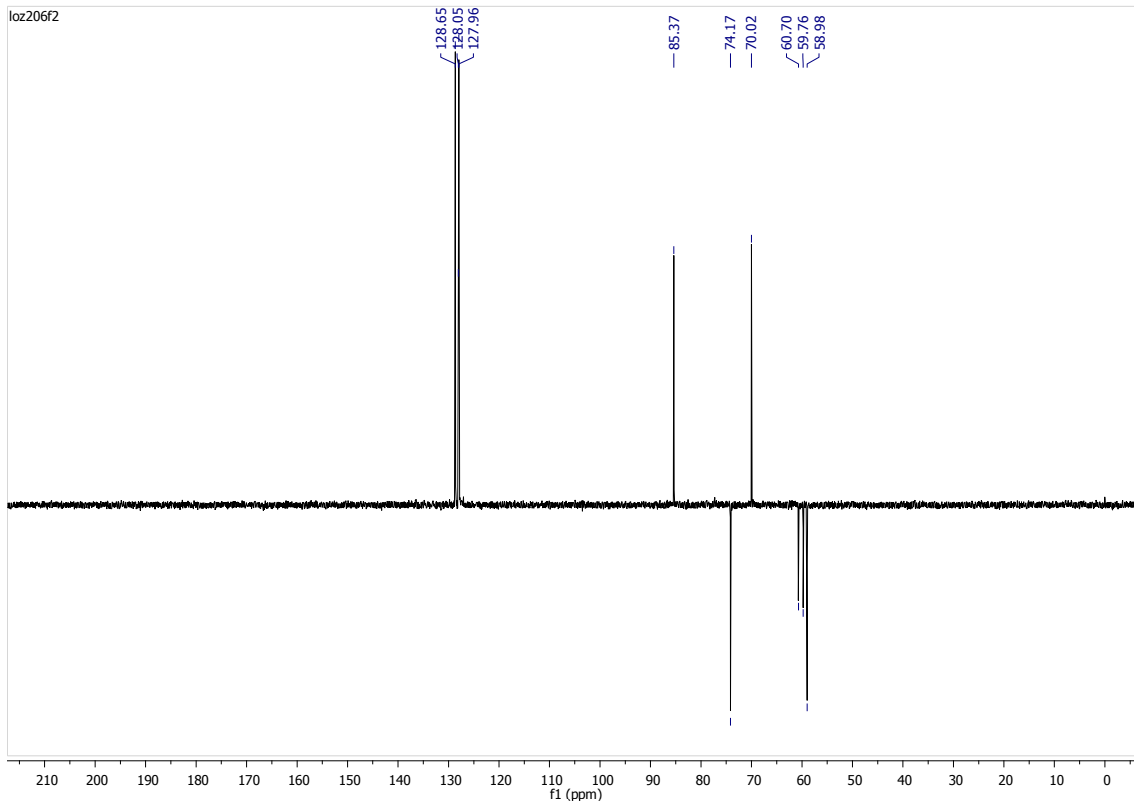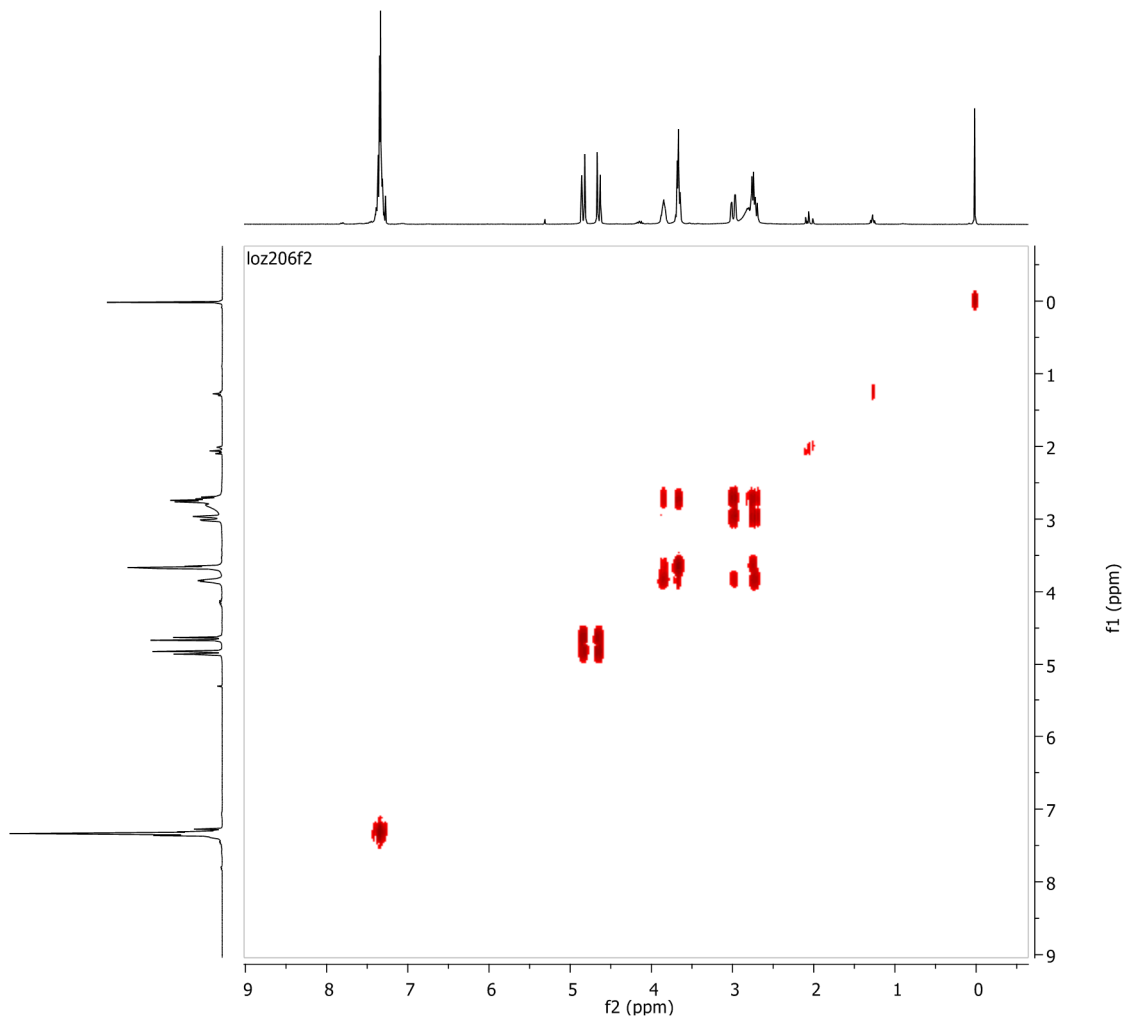

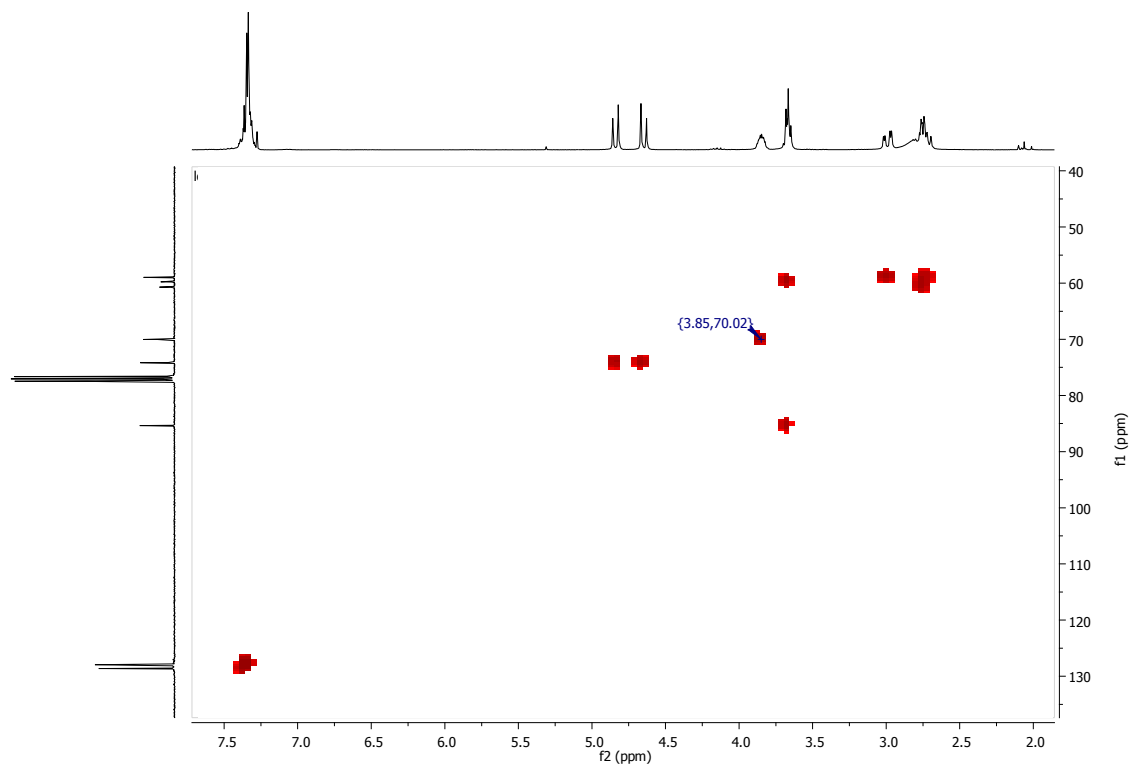

206f1.raw#41 @0.39 MS1 p +, base peak: 388.2102 m/z (2.1E10)  
Scan definition: FTMS + p ESI Full ms (100.00-1500.00)

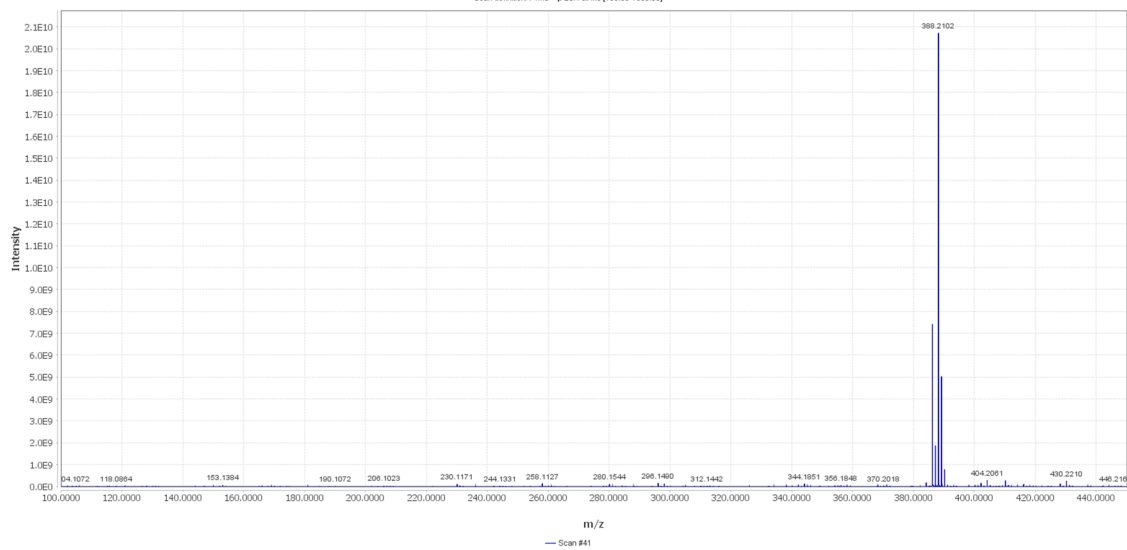

ESI HRMS:  $[\text{M}+\text{H}]^+$  calcd for  $\text{C}_{22}\text{H}_{30}\text{NO}_5$  388.2119; found 388.2102



***N*-Propynyl-1,5-dideoxy-1,5-imino-D-glucitol (39a):**

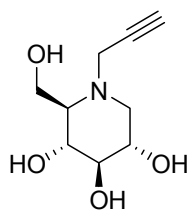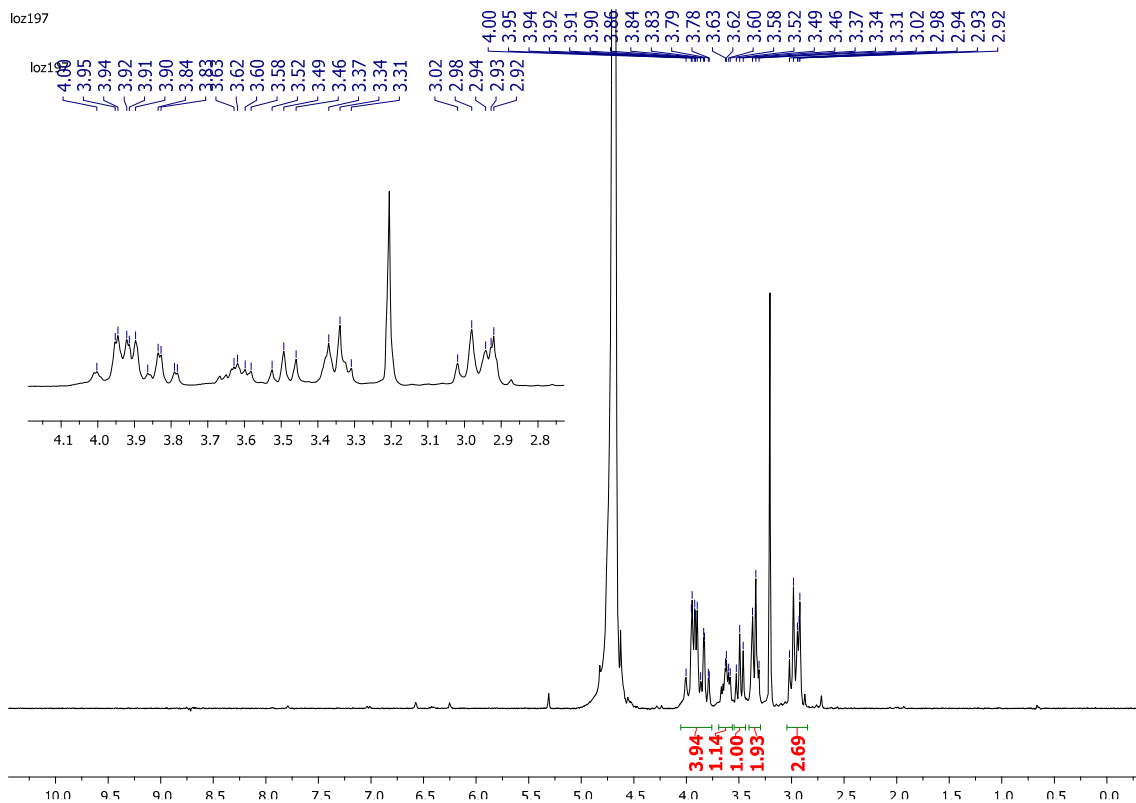

***N*-Propynyl-1,6-dideoxy-1,6-imino-L-iditol (39b):**

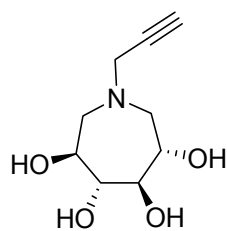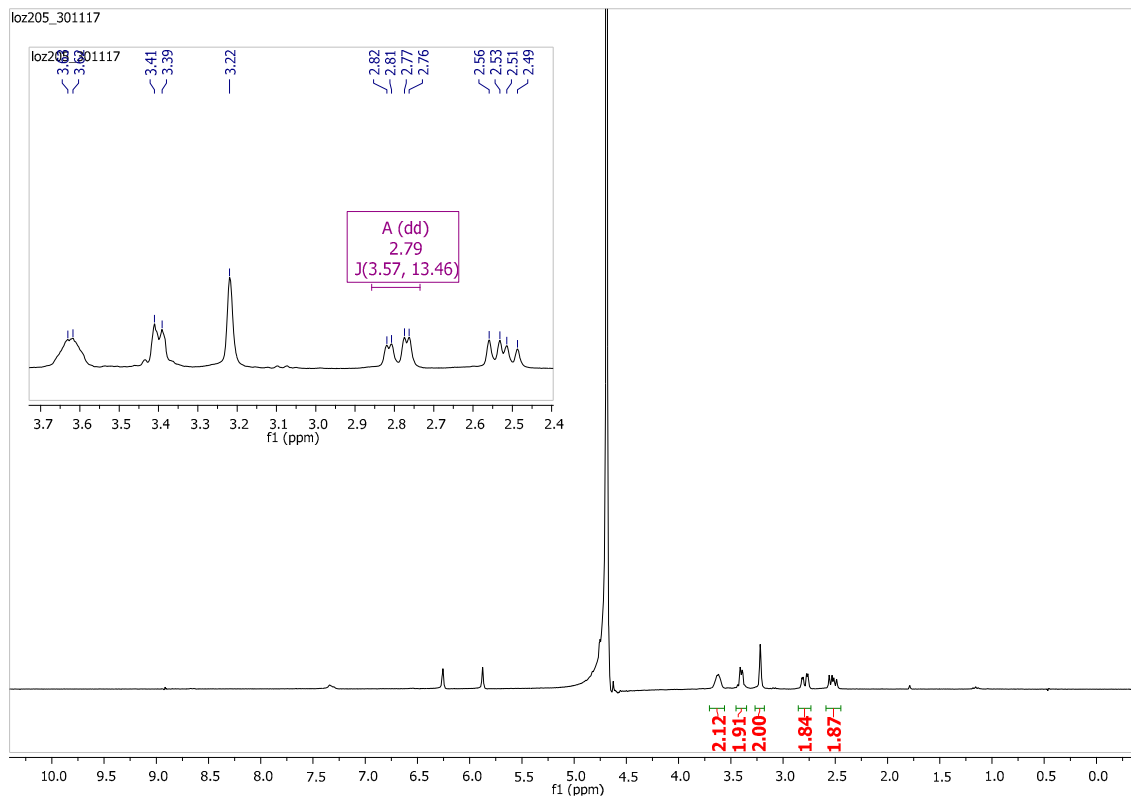

**N-Butyl-1,5-dideoxy-1,5-imino-D-glucitol (40a):**

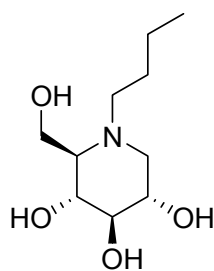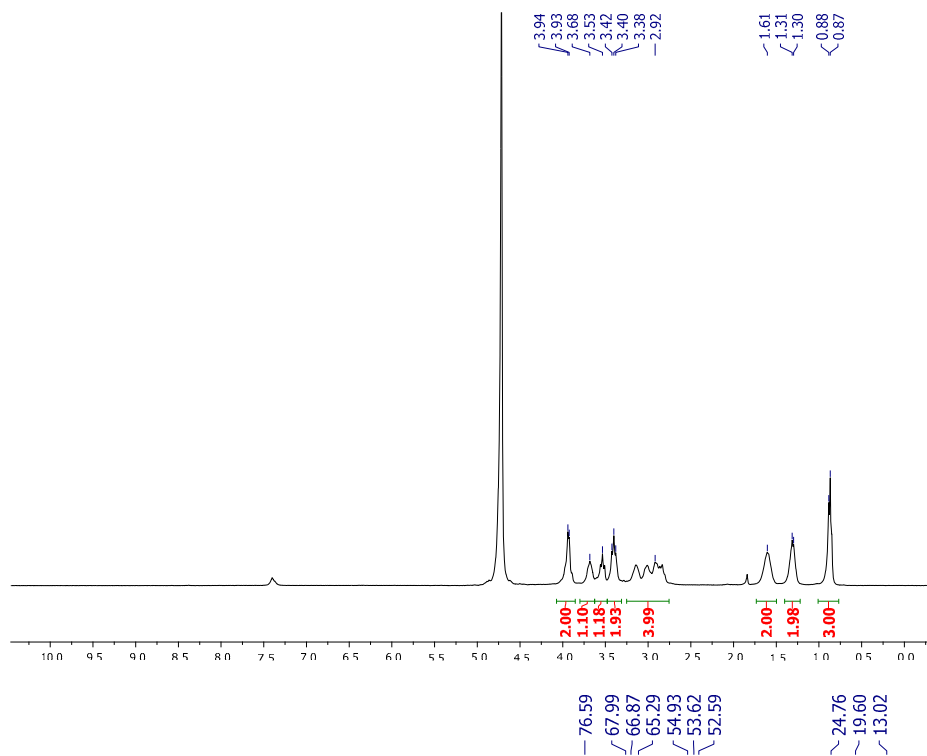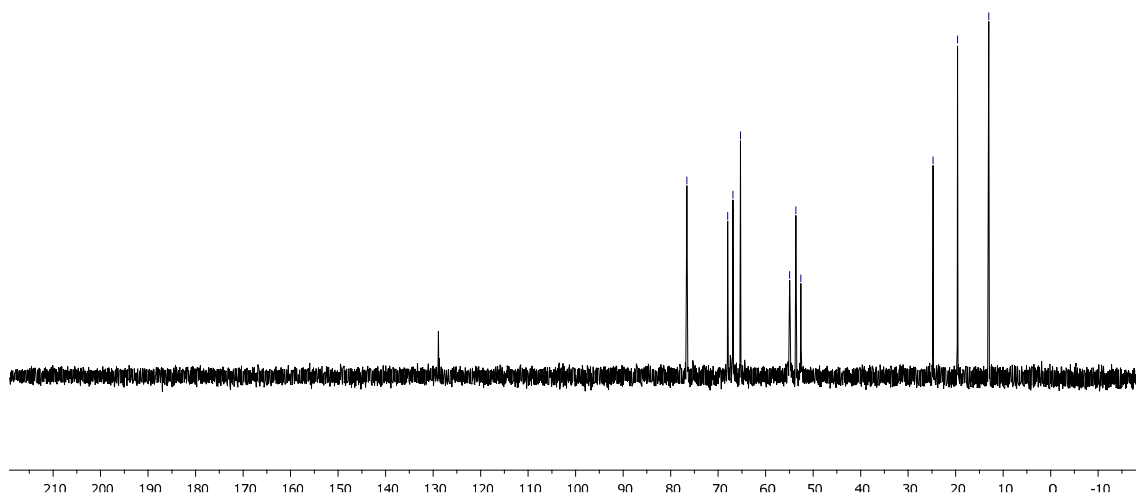

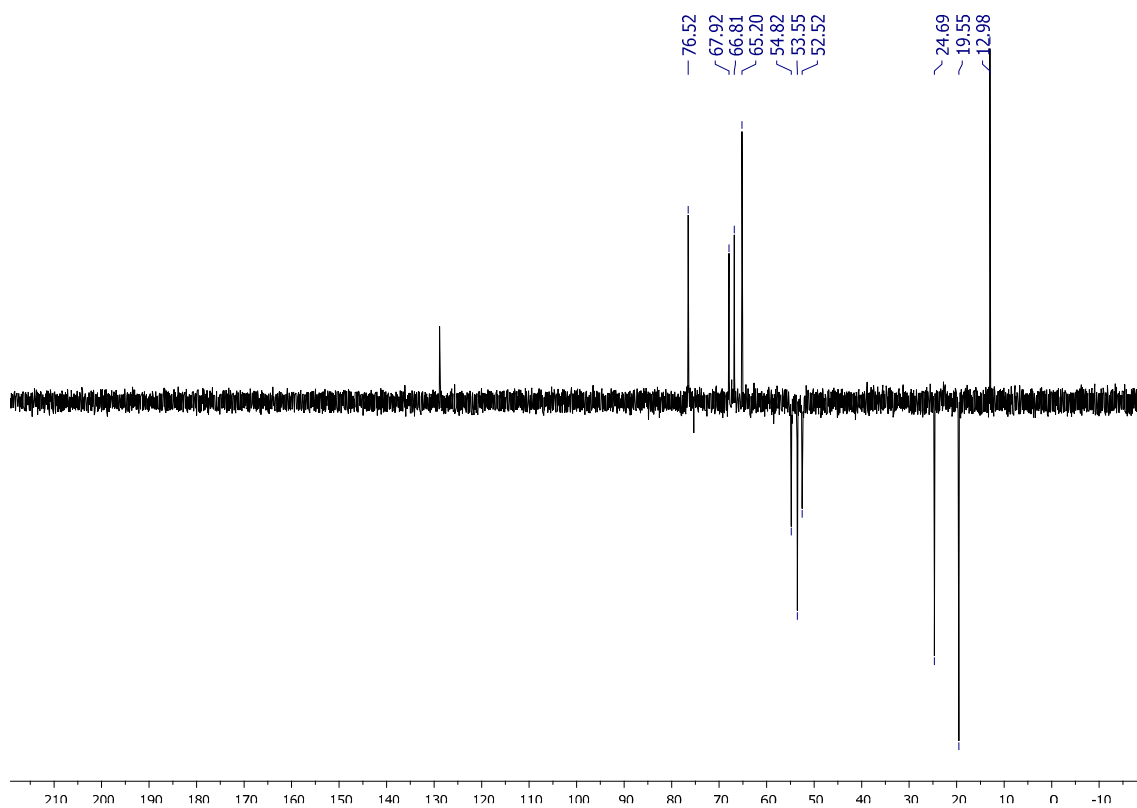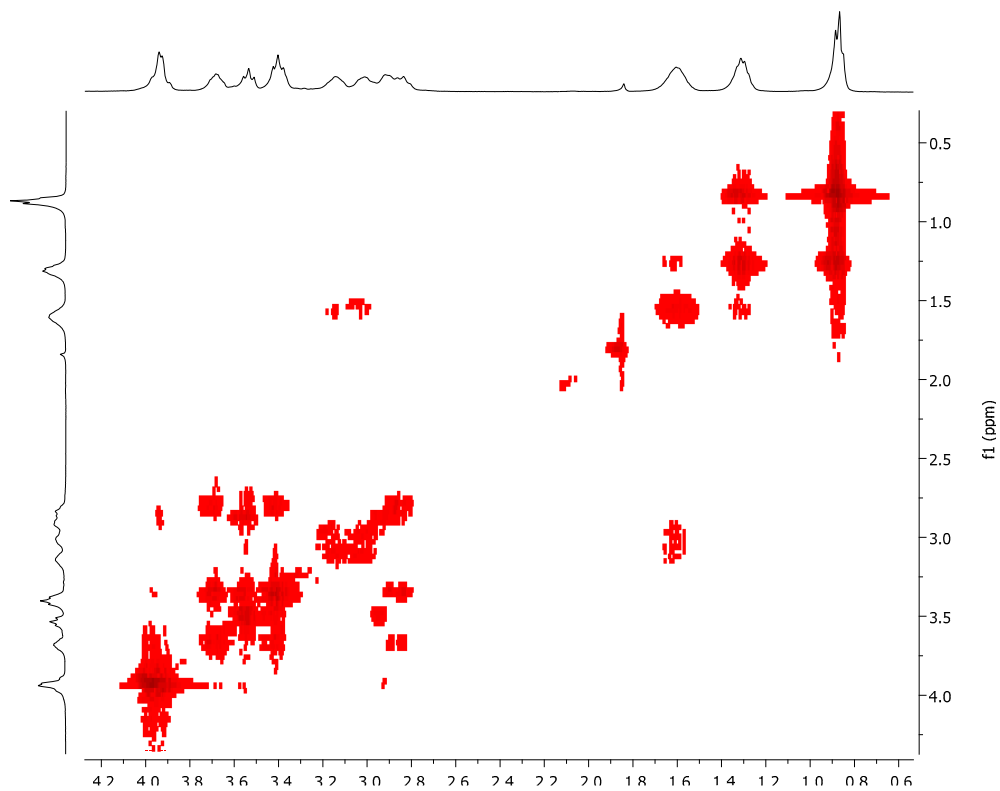

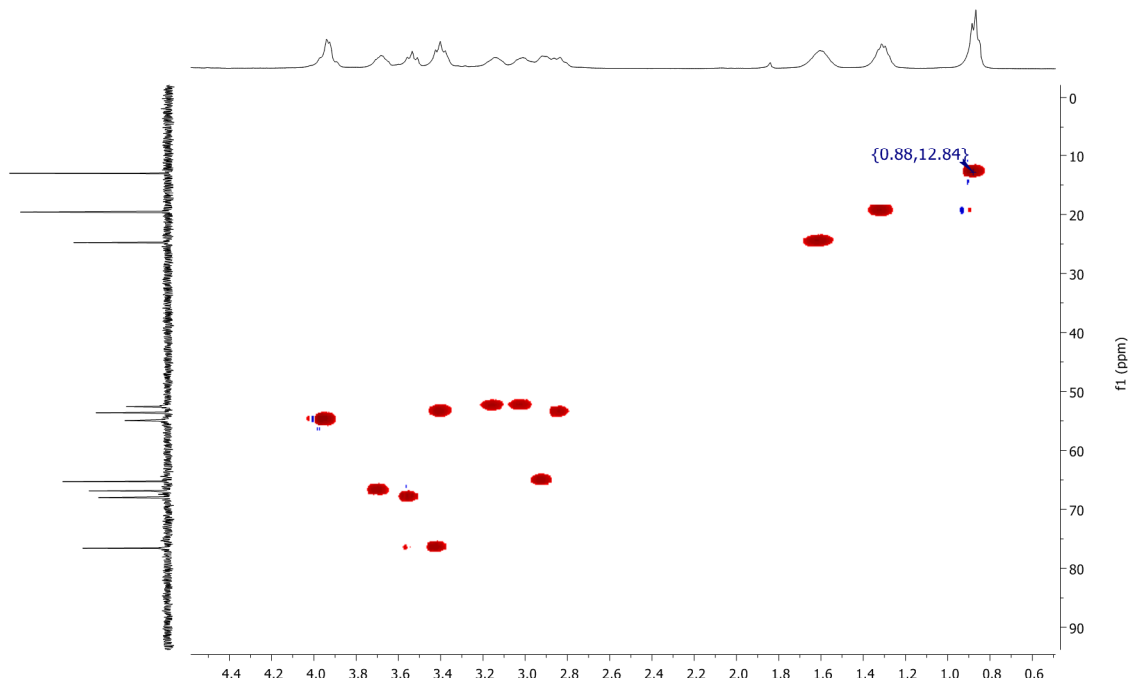

**N-Butyl-1,6-dideoxy-1,6-imino-L-iditol (40b):**

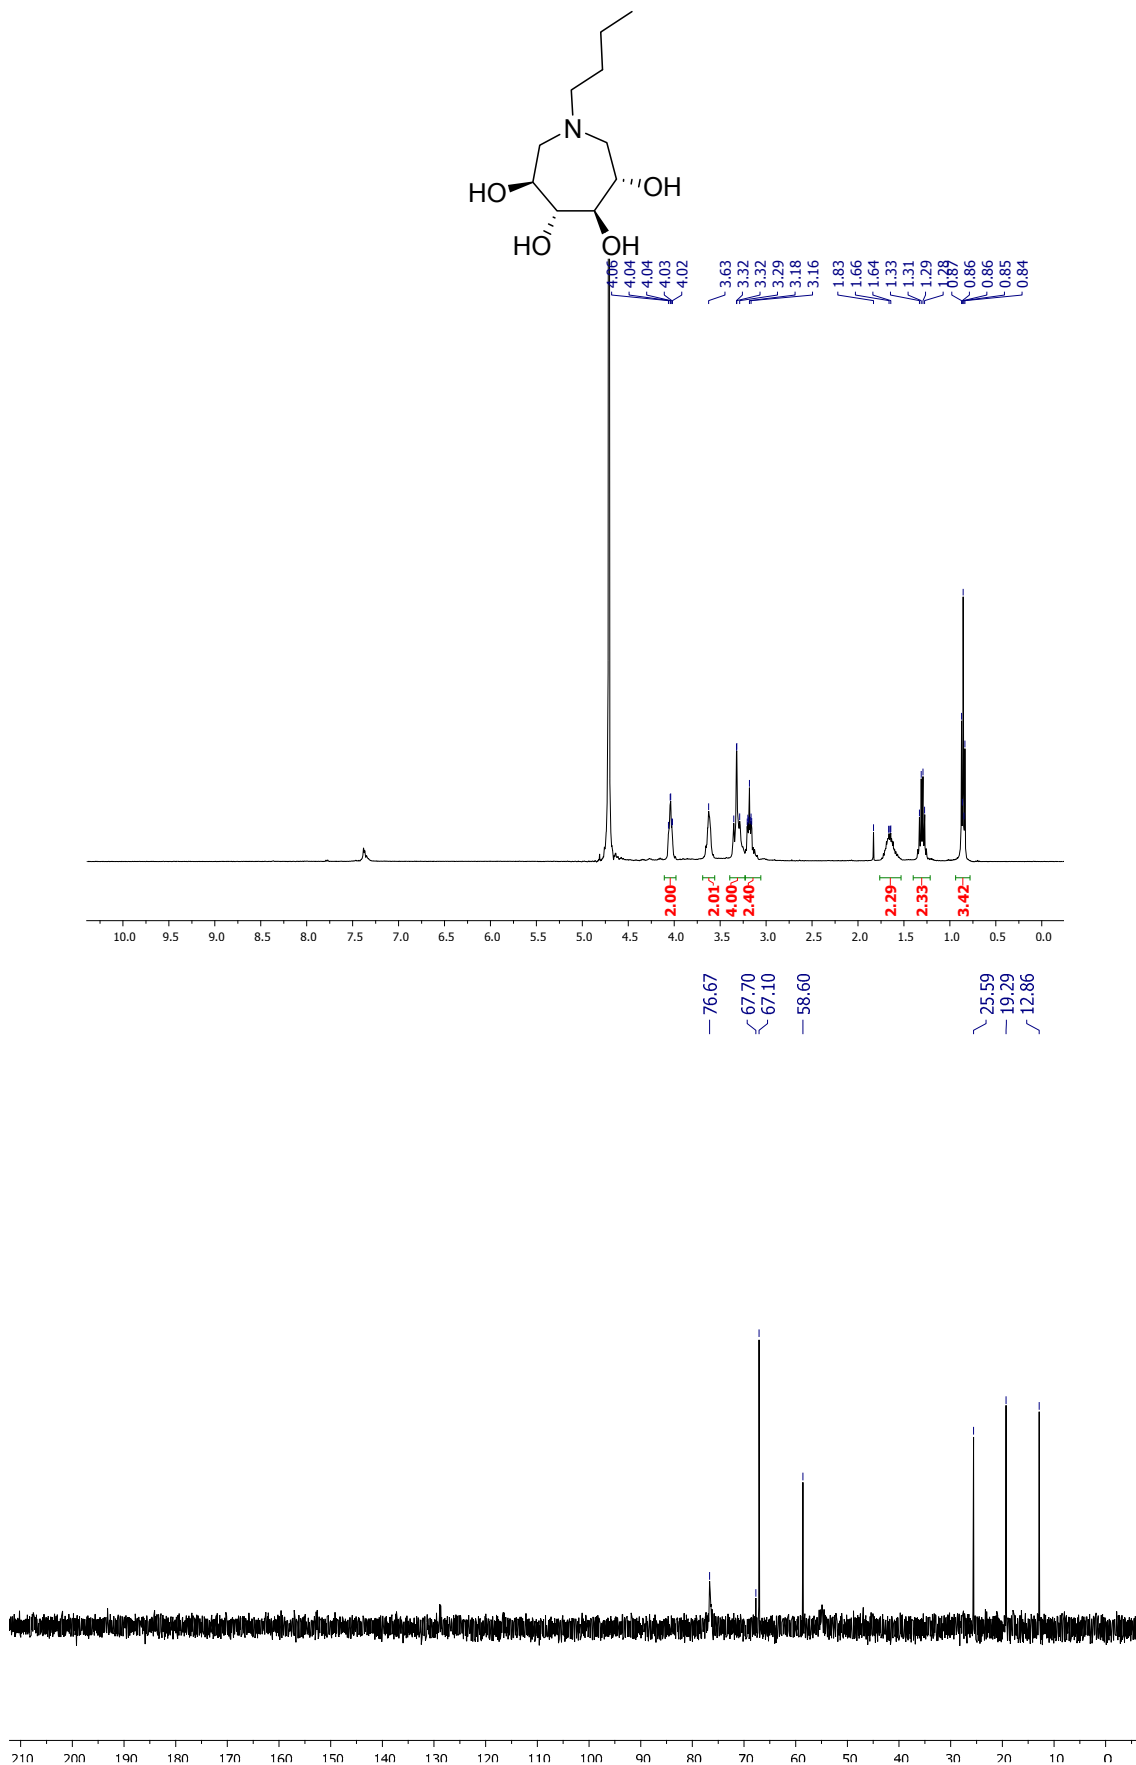

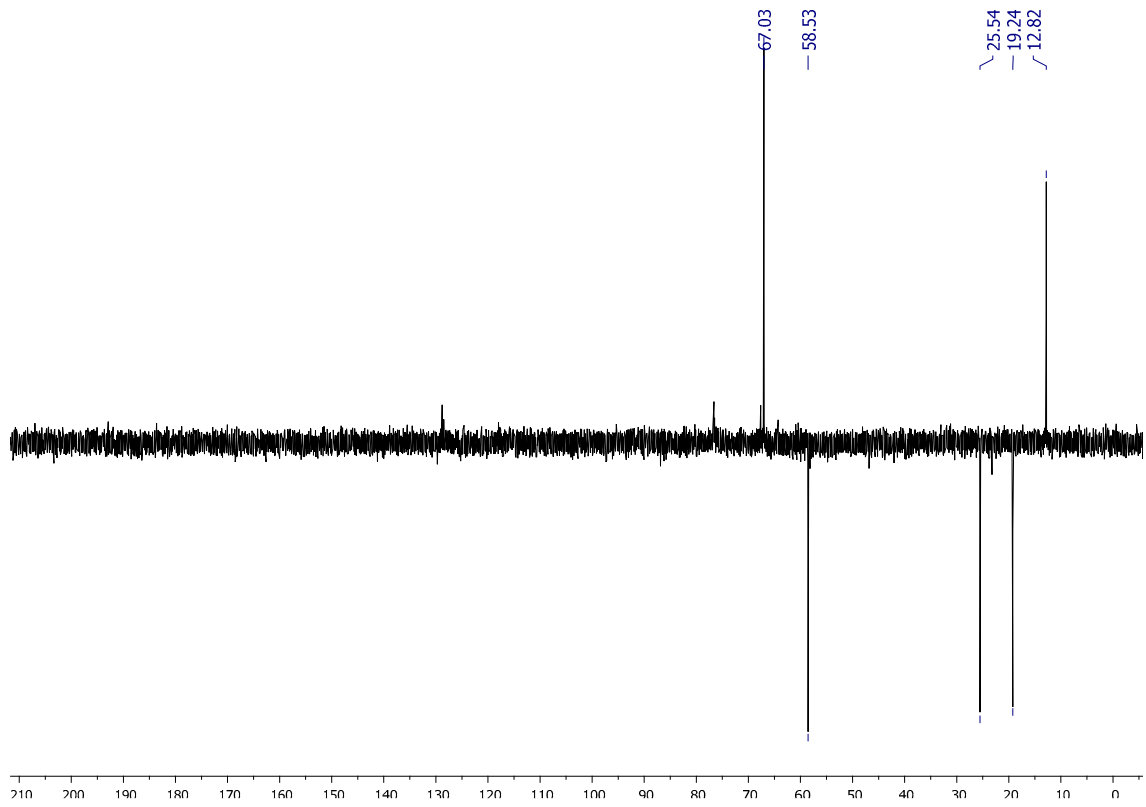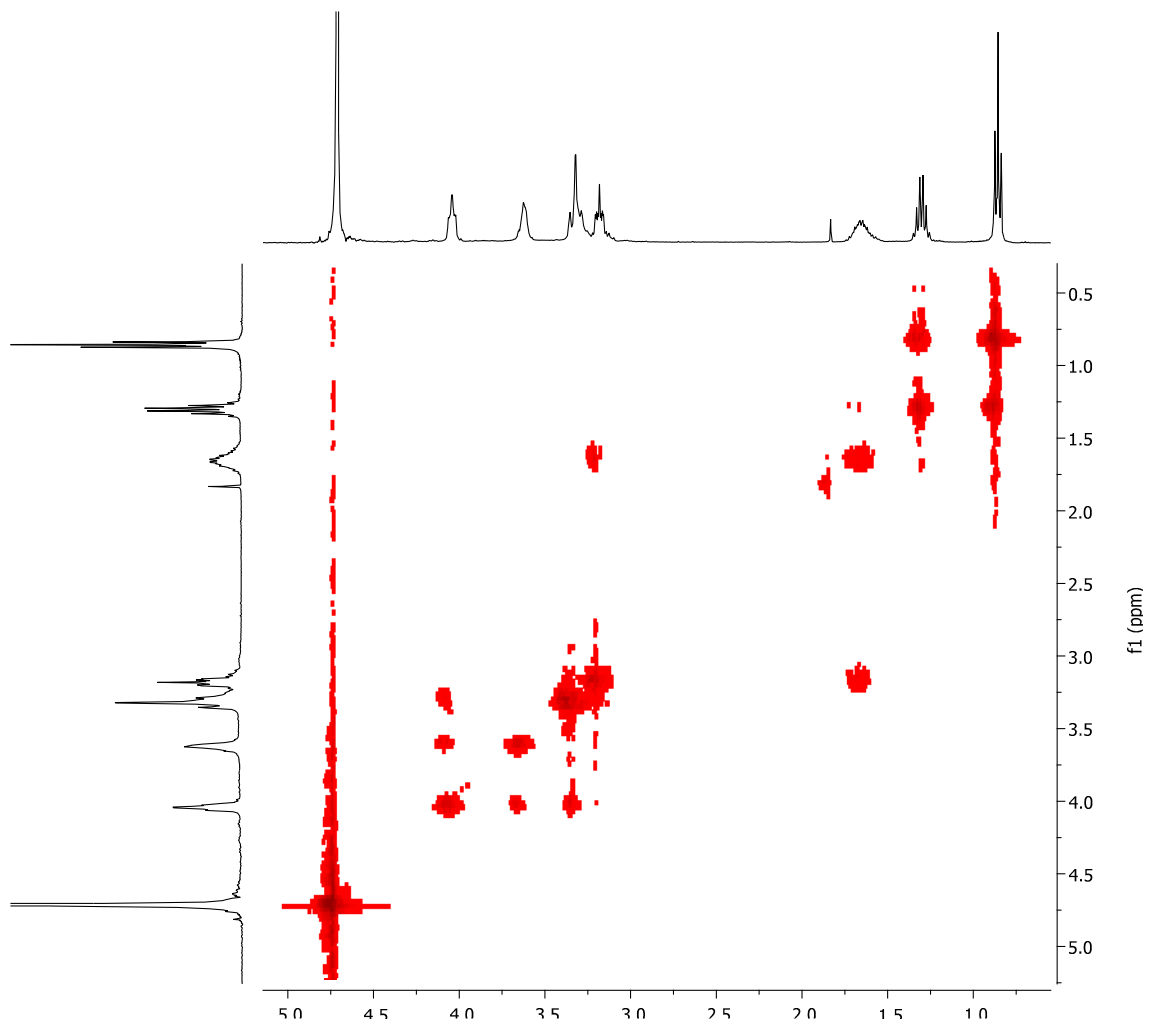

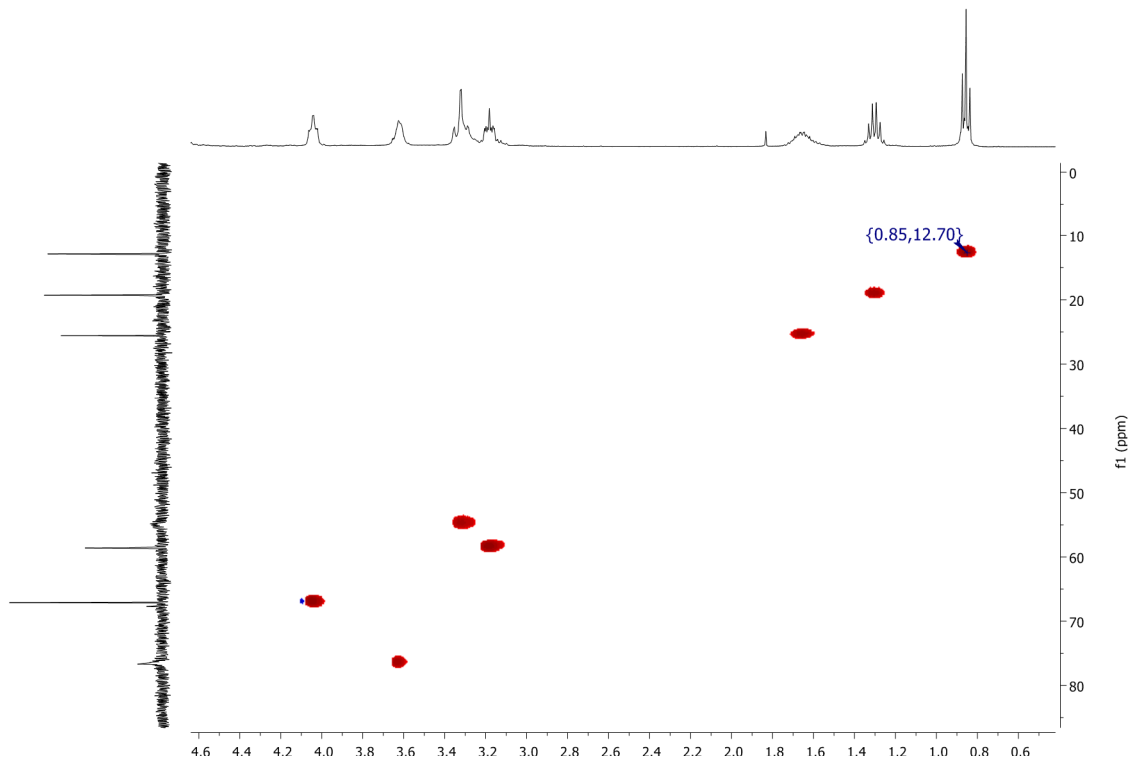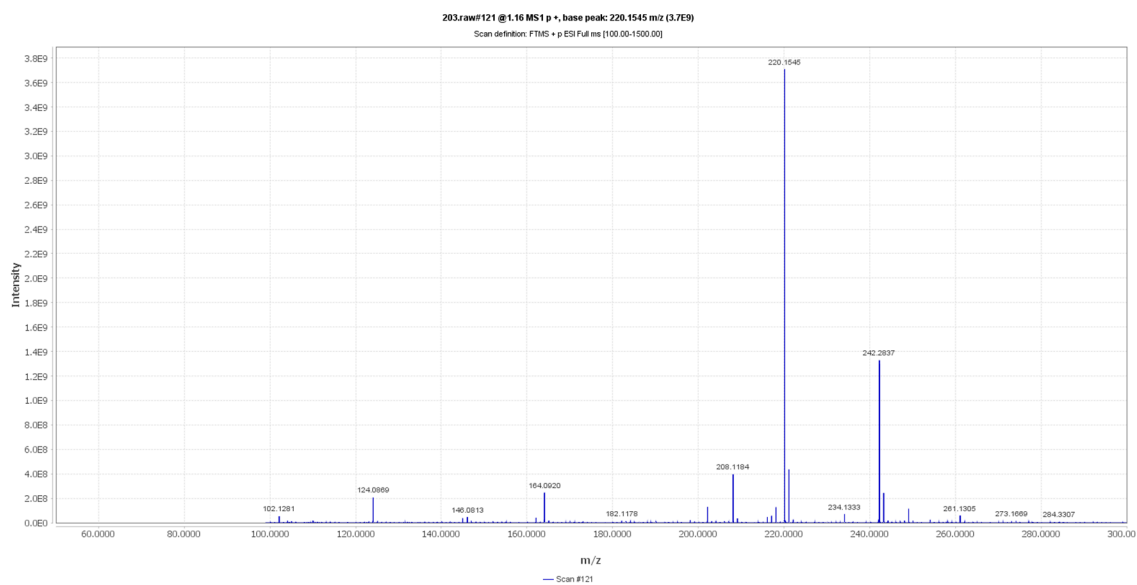

ESI HRMS:  $[M+H]^+$  calcd for  $C_{10}H_{22}NO_4$  220.1544; found 220.1545



**N-Hydroxyethyl-1,5-dideoxy-1,5-imino-D-glucitol (41a):**

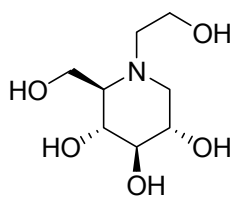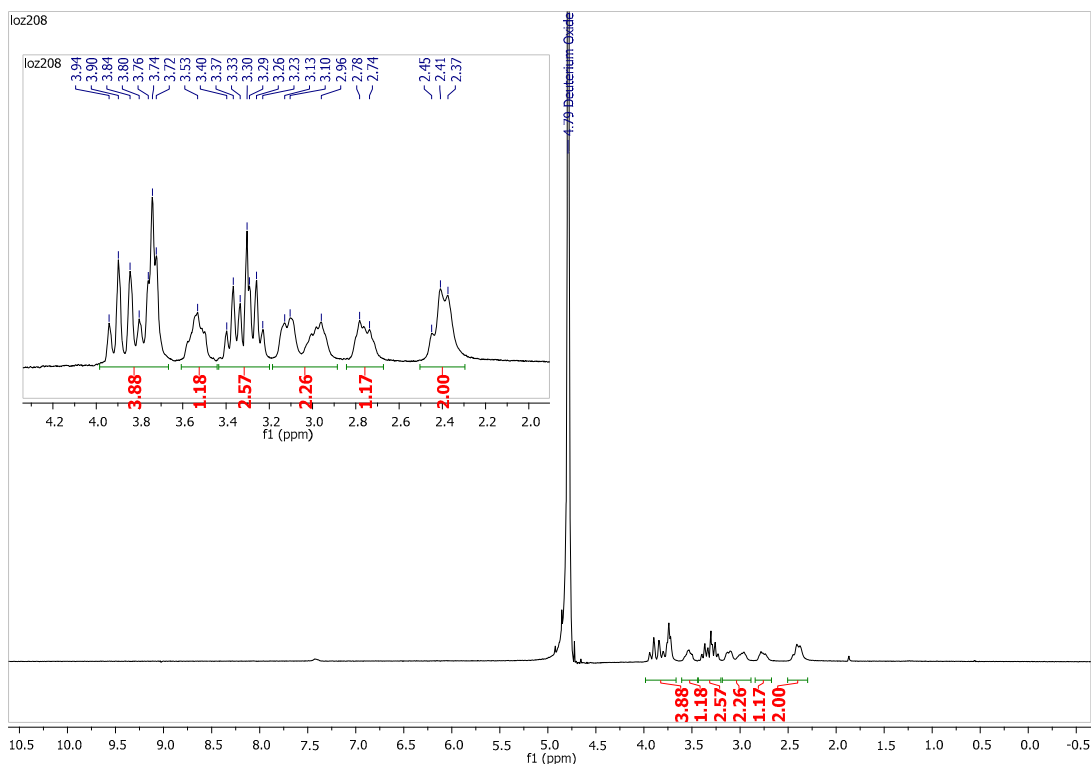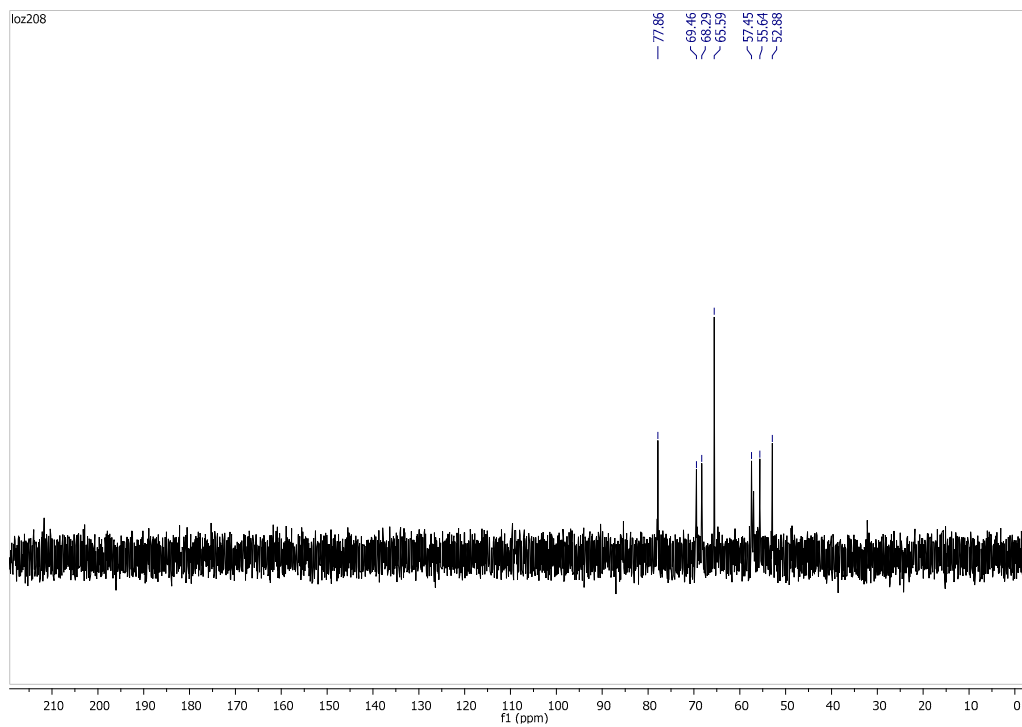

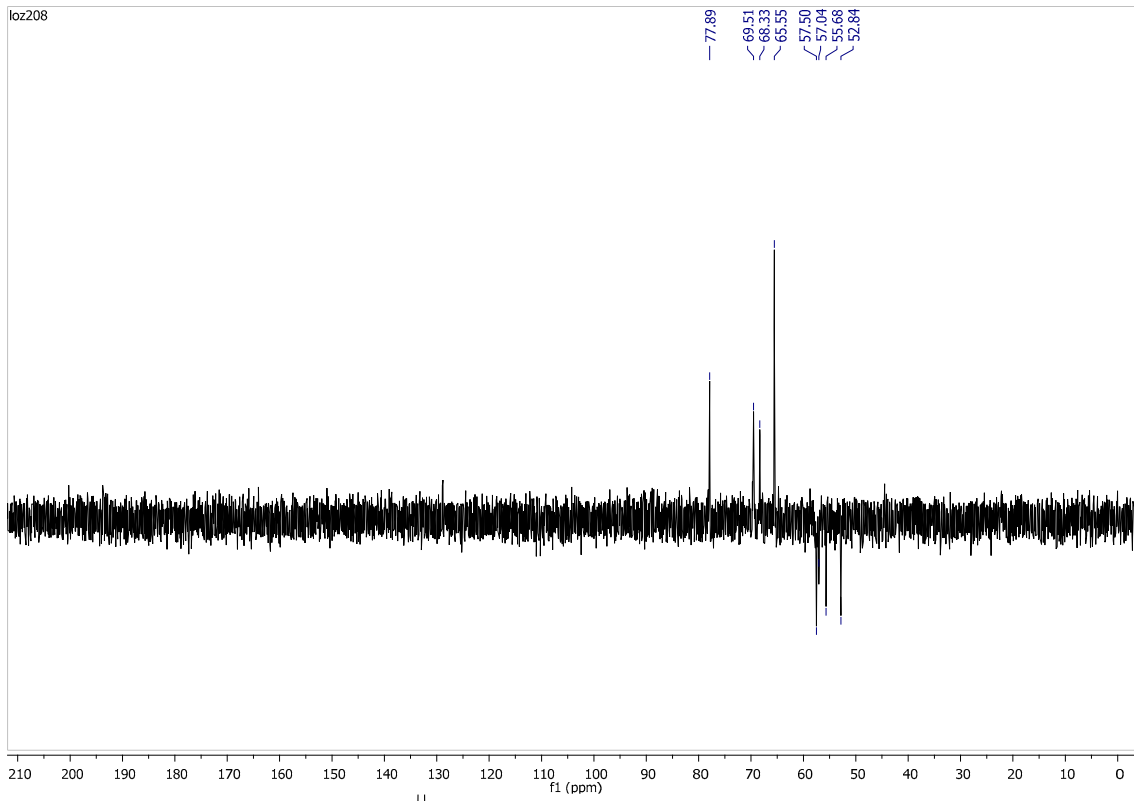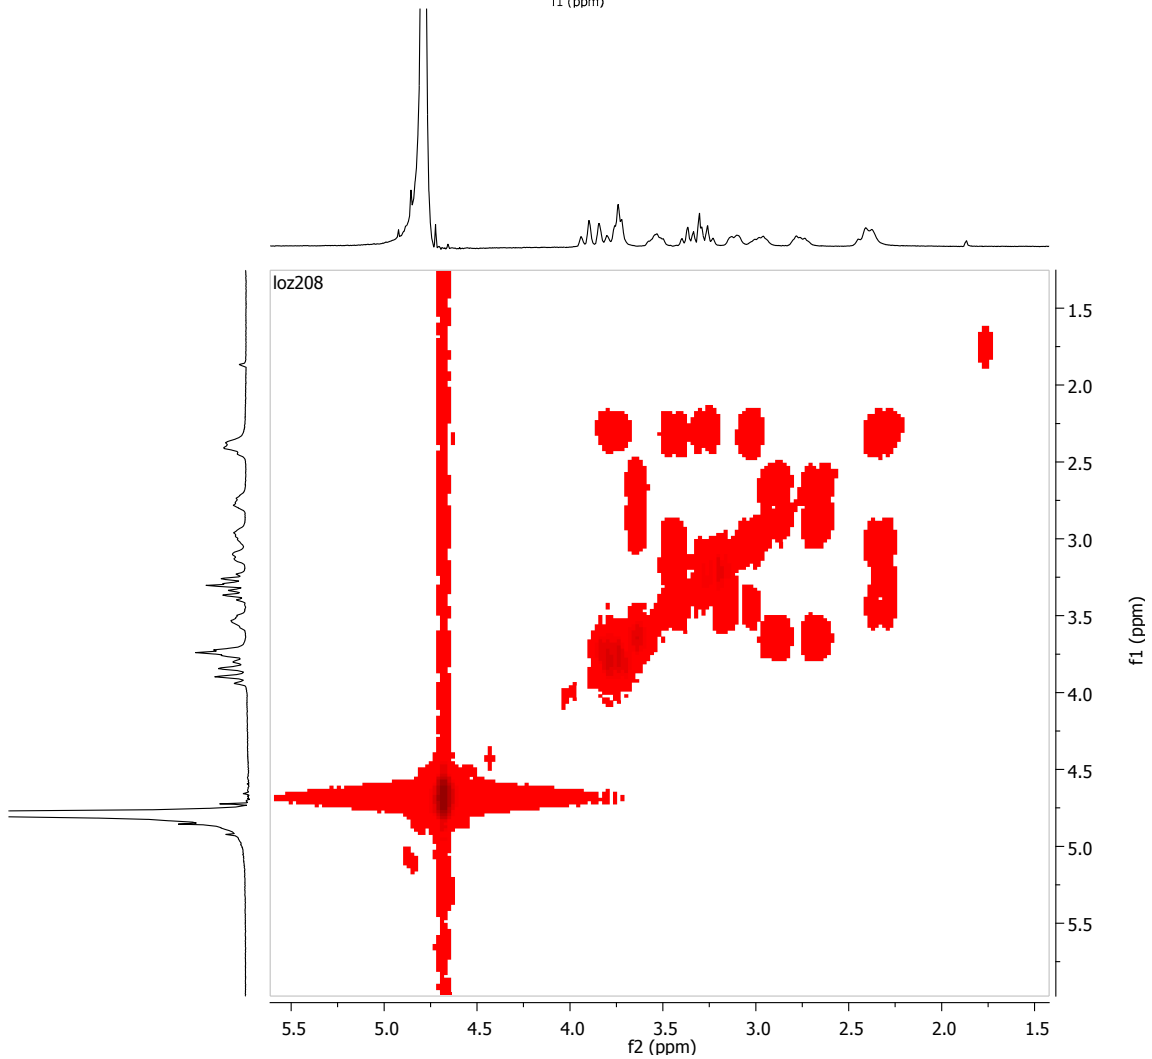

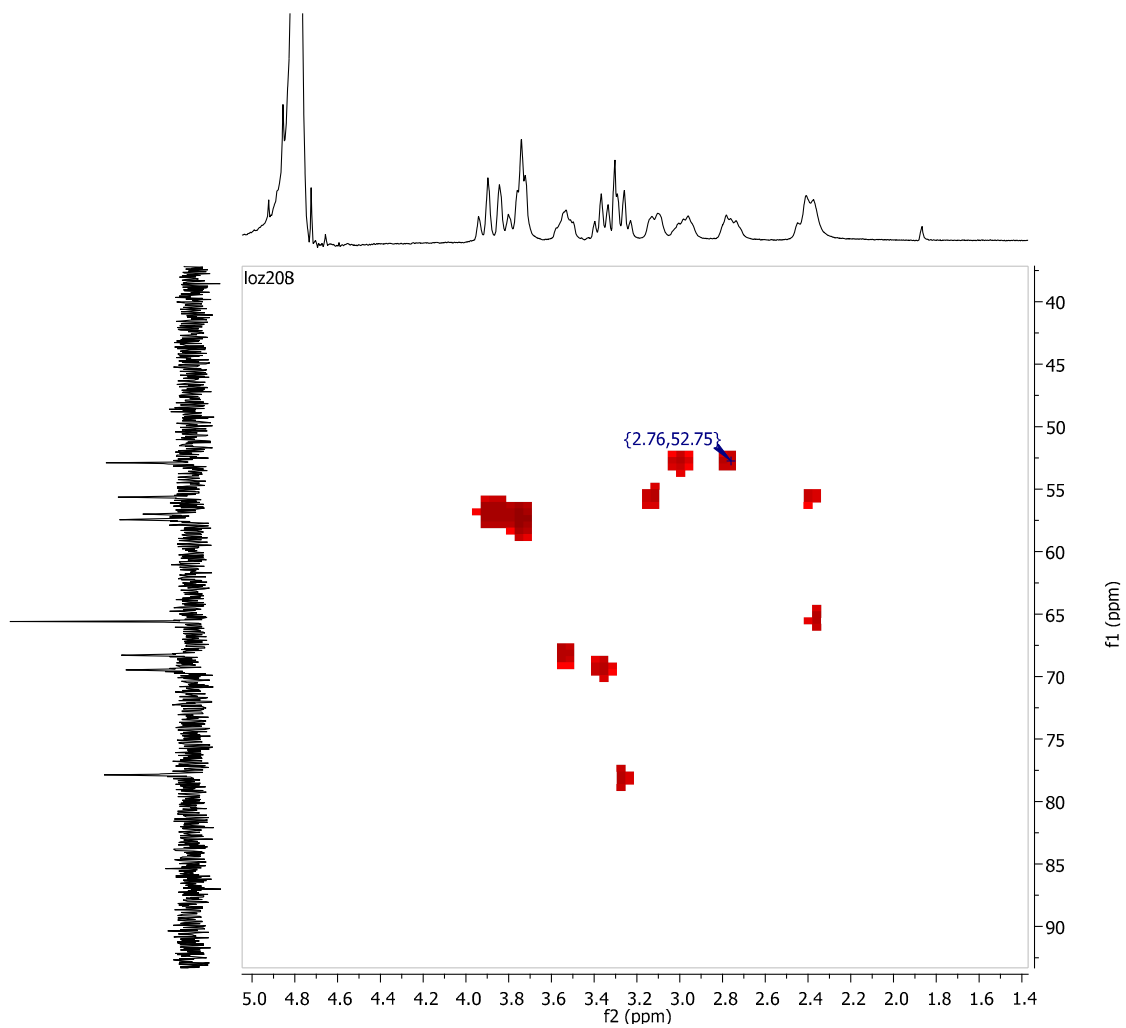

**N-Hydroxyethyl-1,6-dideoxy-1,6-imino-L-idoitol (41b):**

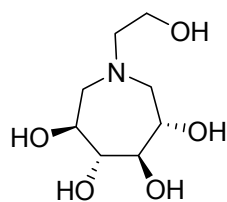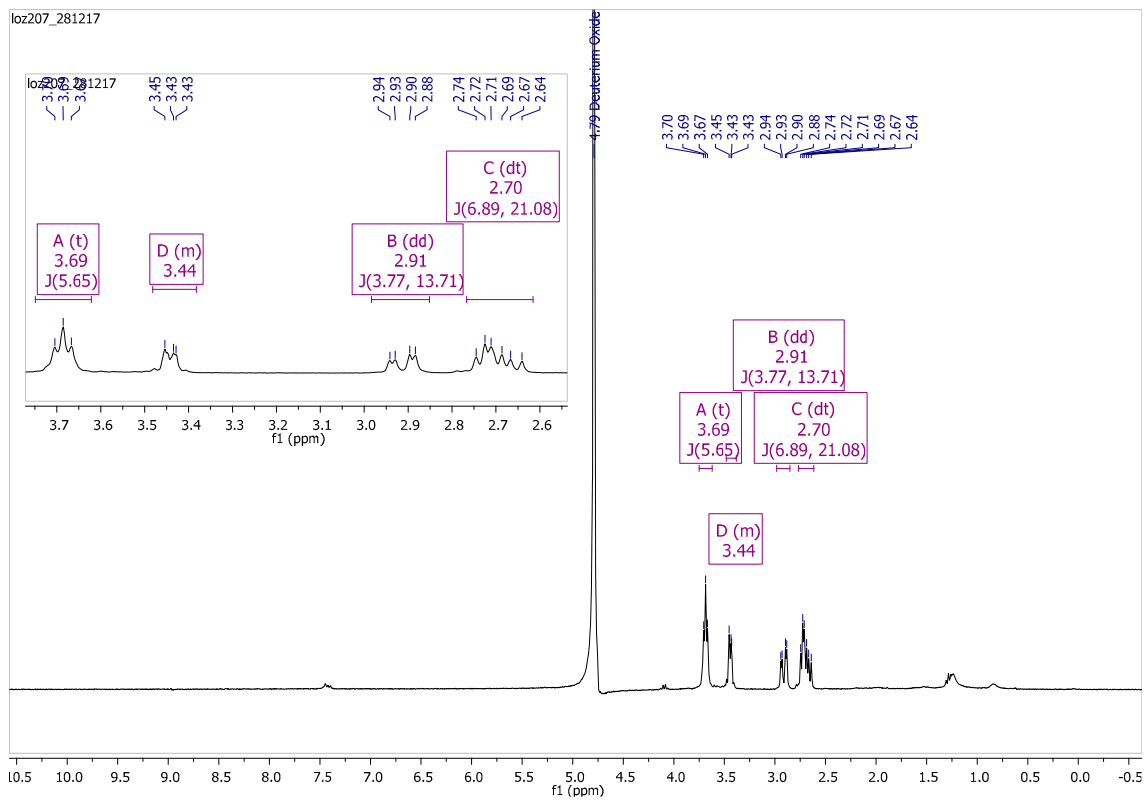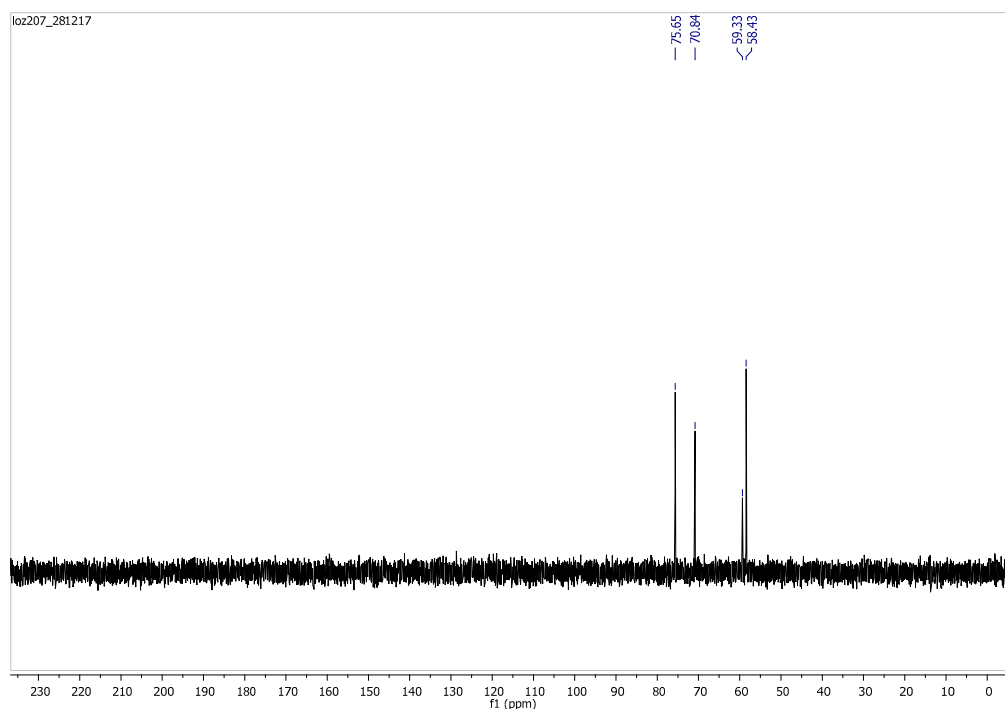

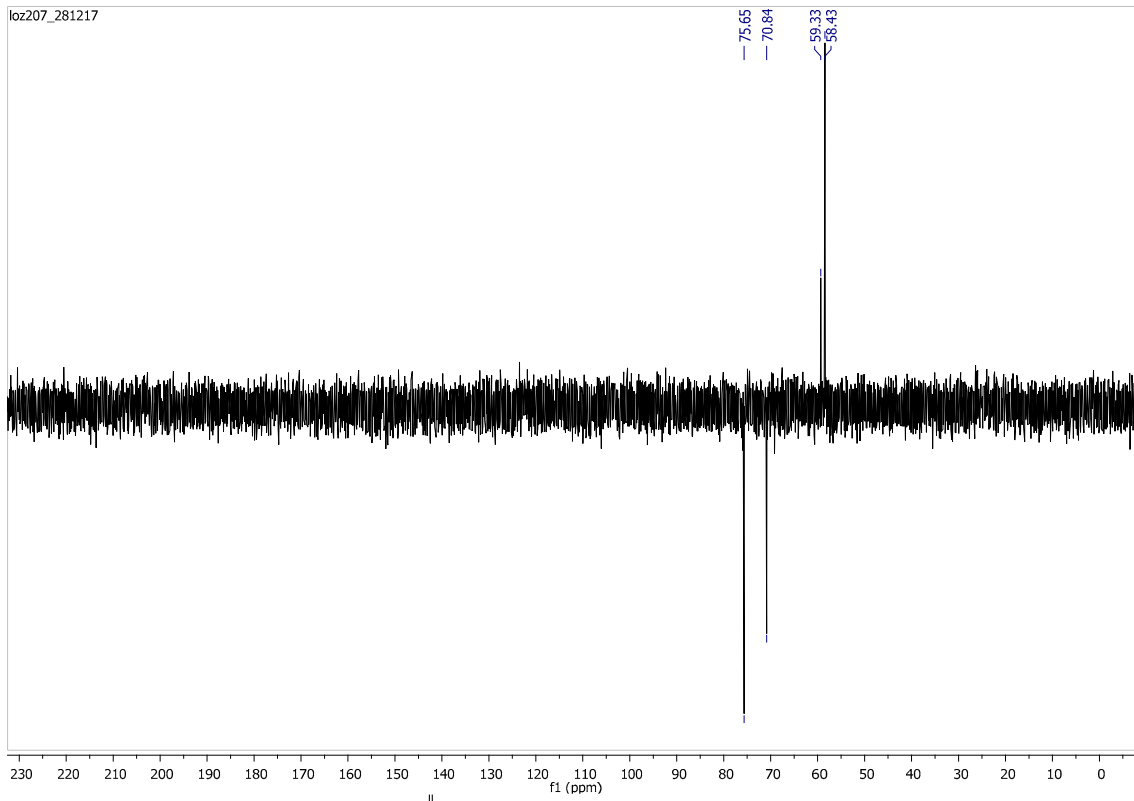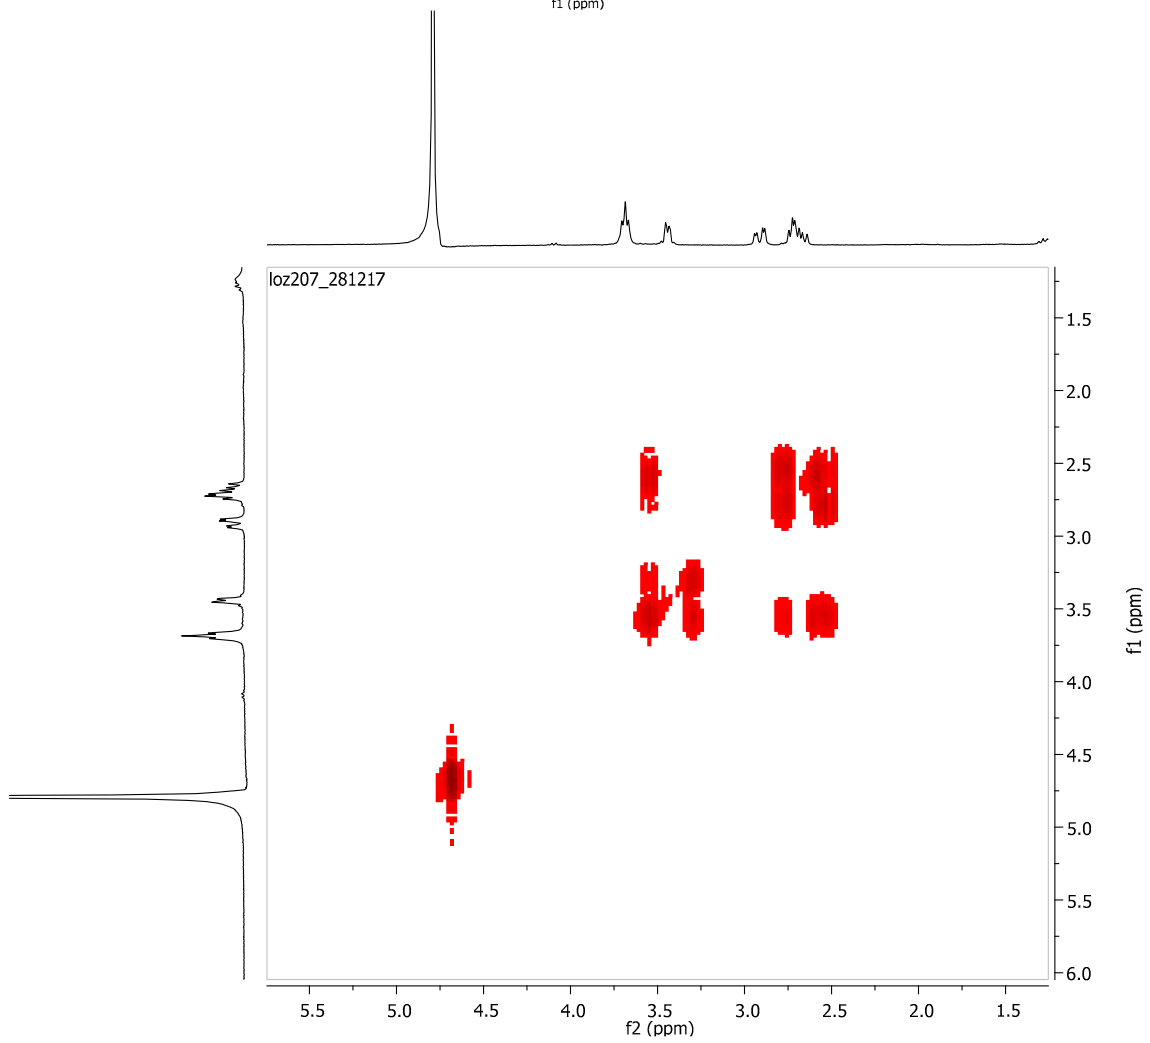

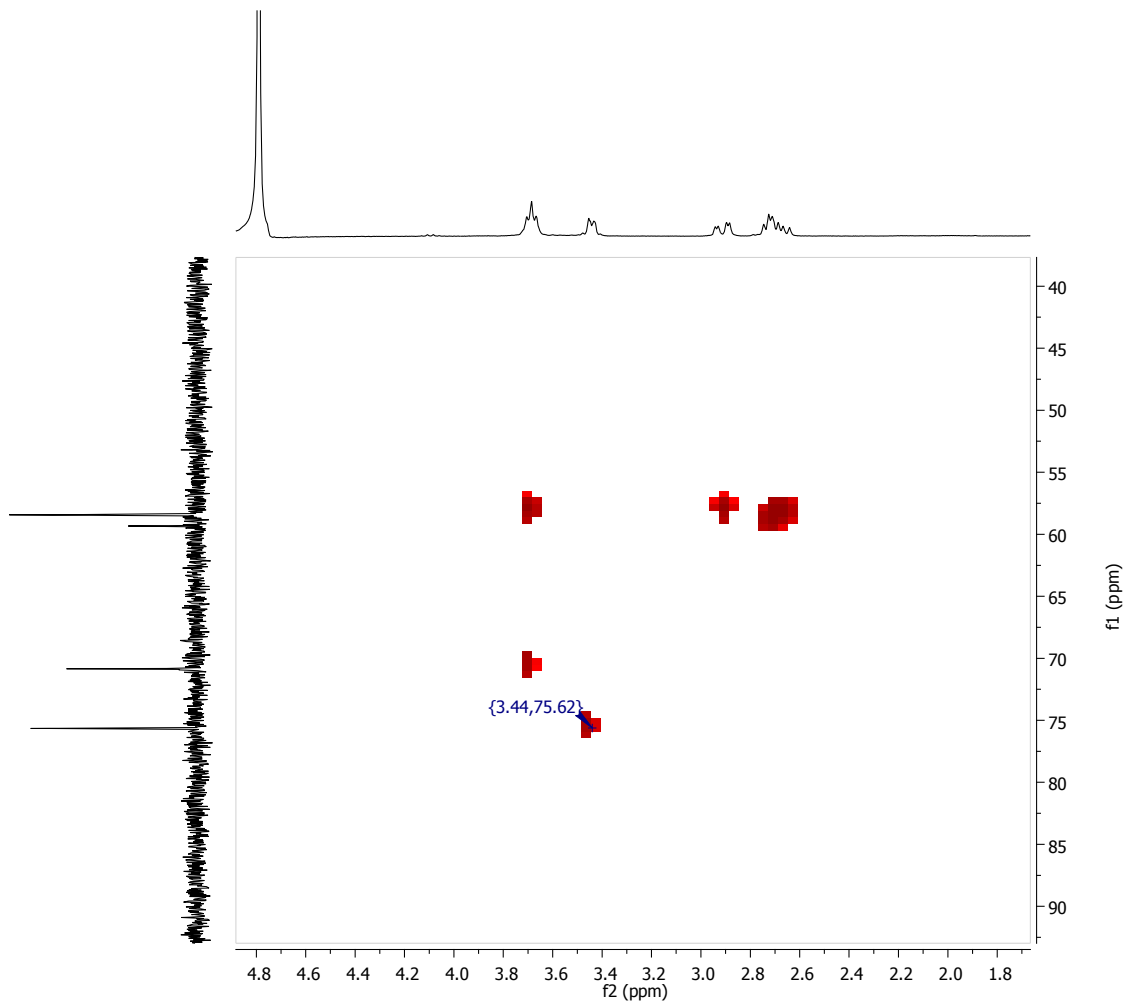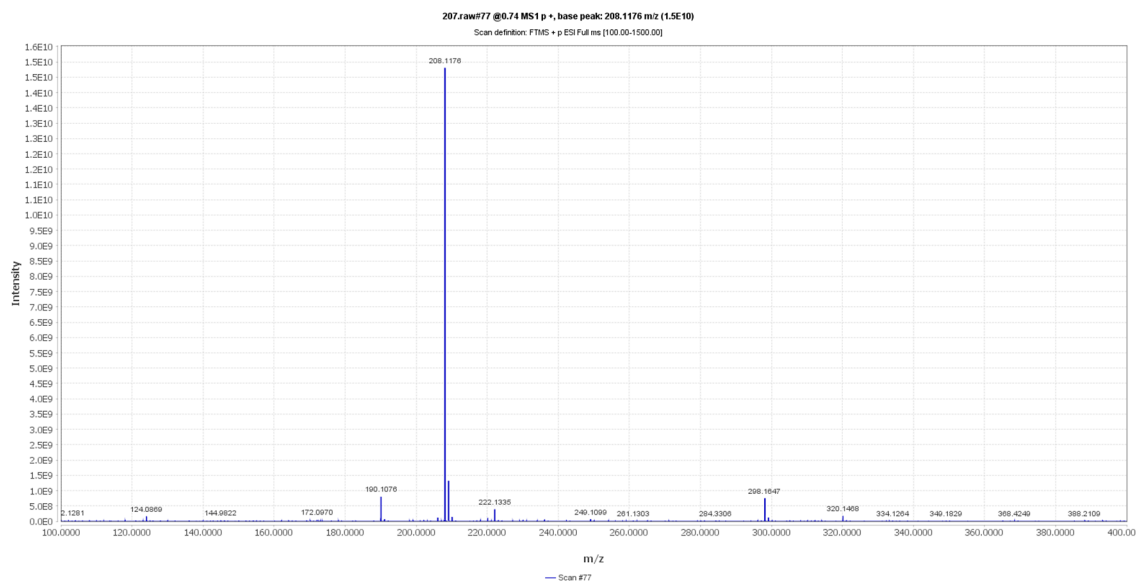

ESI HRMS:  $[\text{M}+\text{H}]^+$  calcd for  $\text{C}_8\text{H}_{18}\text{NO}_5$  208.1180; found 208.1176

|     | Structure | Yeast $\alpha$ -Glucosidase | Almond $\beta$ -Glucosidase |
|-----|-----------|-----------------------------|-----------------------------|
| DNJ |           | 134.4±2.1                   | 33.1±3.1                    |
| 26a |           | NI                          | 1716±12.8                   |
| 26b |           | NI                          | NI                          |
| 27a |           | NI                          | 109.7±9.3                   |
| 27b |           | 2031±17.1                   | 184.6±2.6                   |
| 28a |           | NI                          | NI                          |
| 28b |           | NI                          | NI                          |
| 29a |           | NI                          | NI                          |

|            |                                                                                     |           |           |
|------------|-------------------------------------------------------------------------------------|-----------|-----------|
| <b>29b</b> | 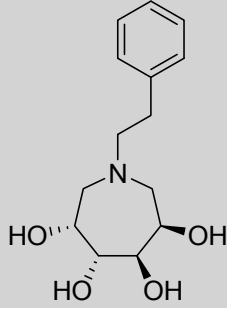   | NI        | NI        |
| <b>39a</b> |    | 2527±82.2 | 635.7±8.5 |
| <b>39b</b> |    | NI        | 3437±70.6 |
| <b>40a</b> |   | NI        | 172.8±1.7 |
| <b>40b</b> |  | NI        | 80.0±4.9  |
| <b>41a</b> |  | 41.3±10.2 | 4.0±1.5   |
| <b>41b</b> |  | 138.8±1.2 | 4.1±1.4   |



# $\alpha$ -Glucosidase Yeast

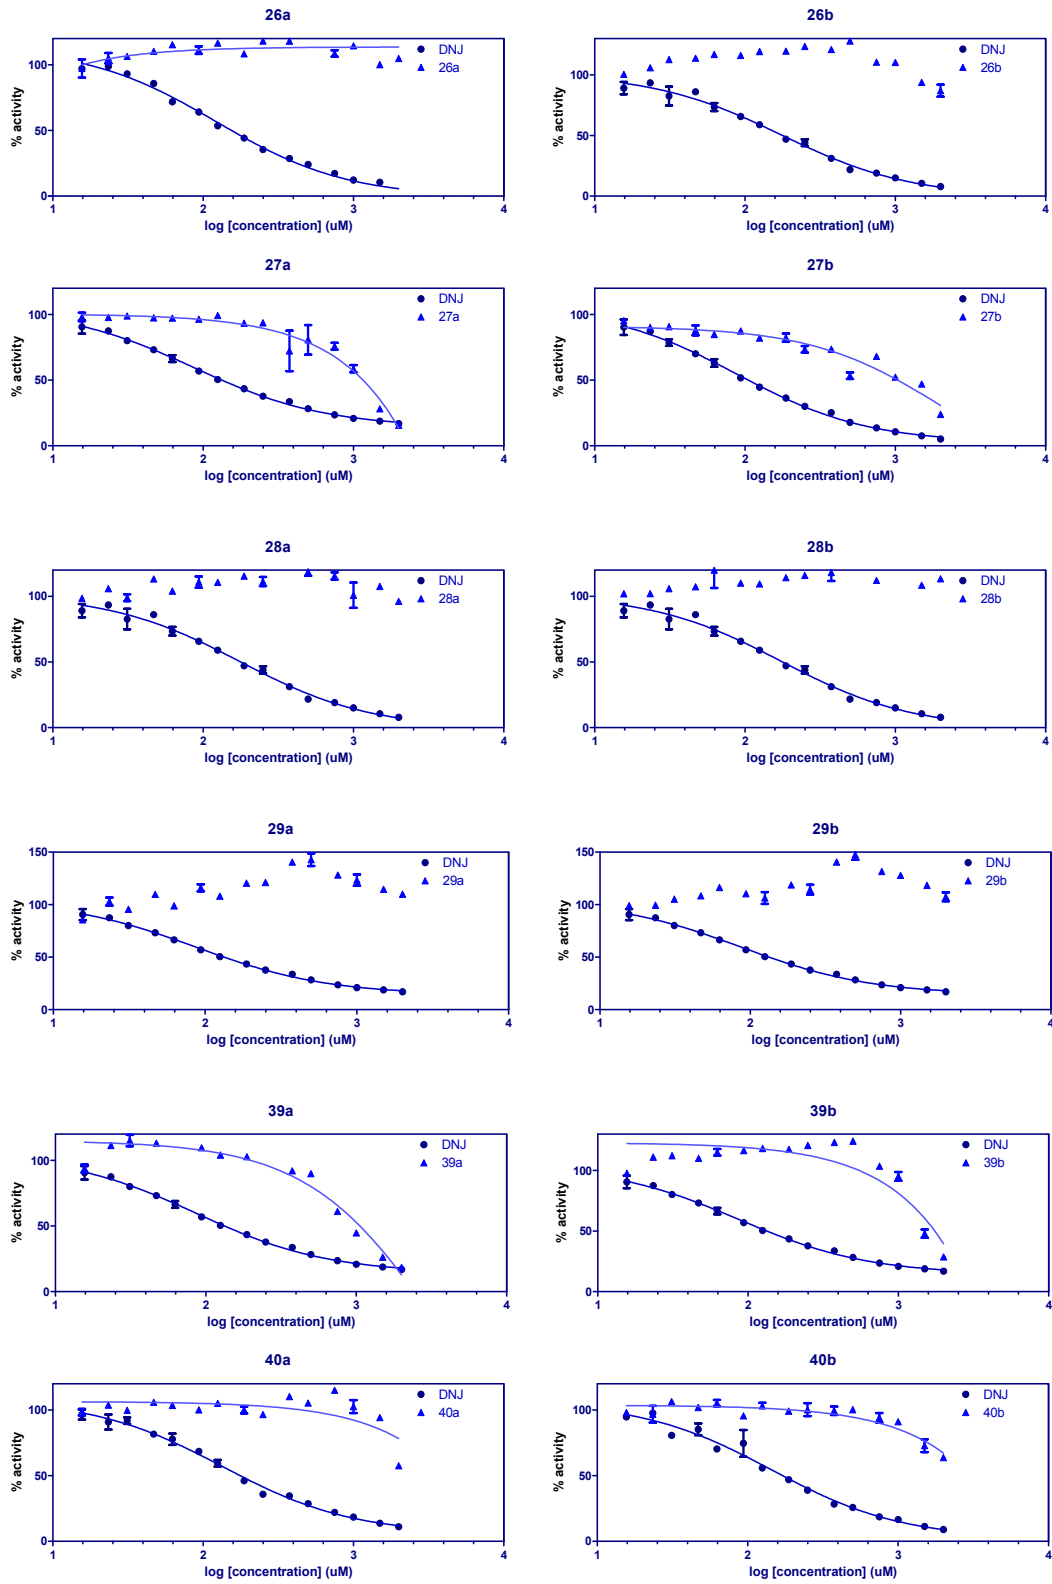

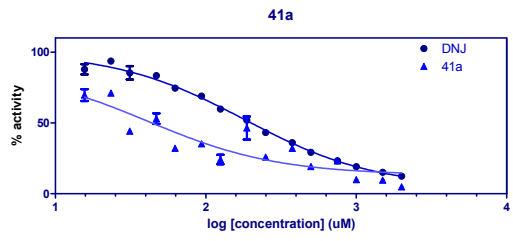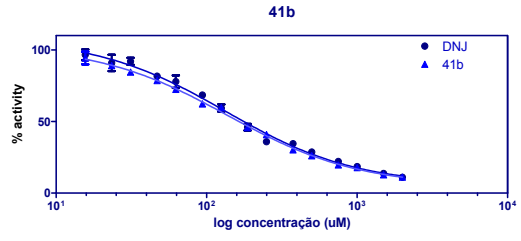

# $\beta$ -Glucosidase Almond

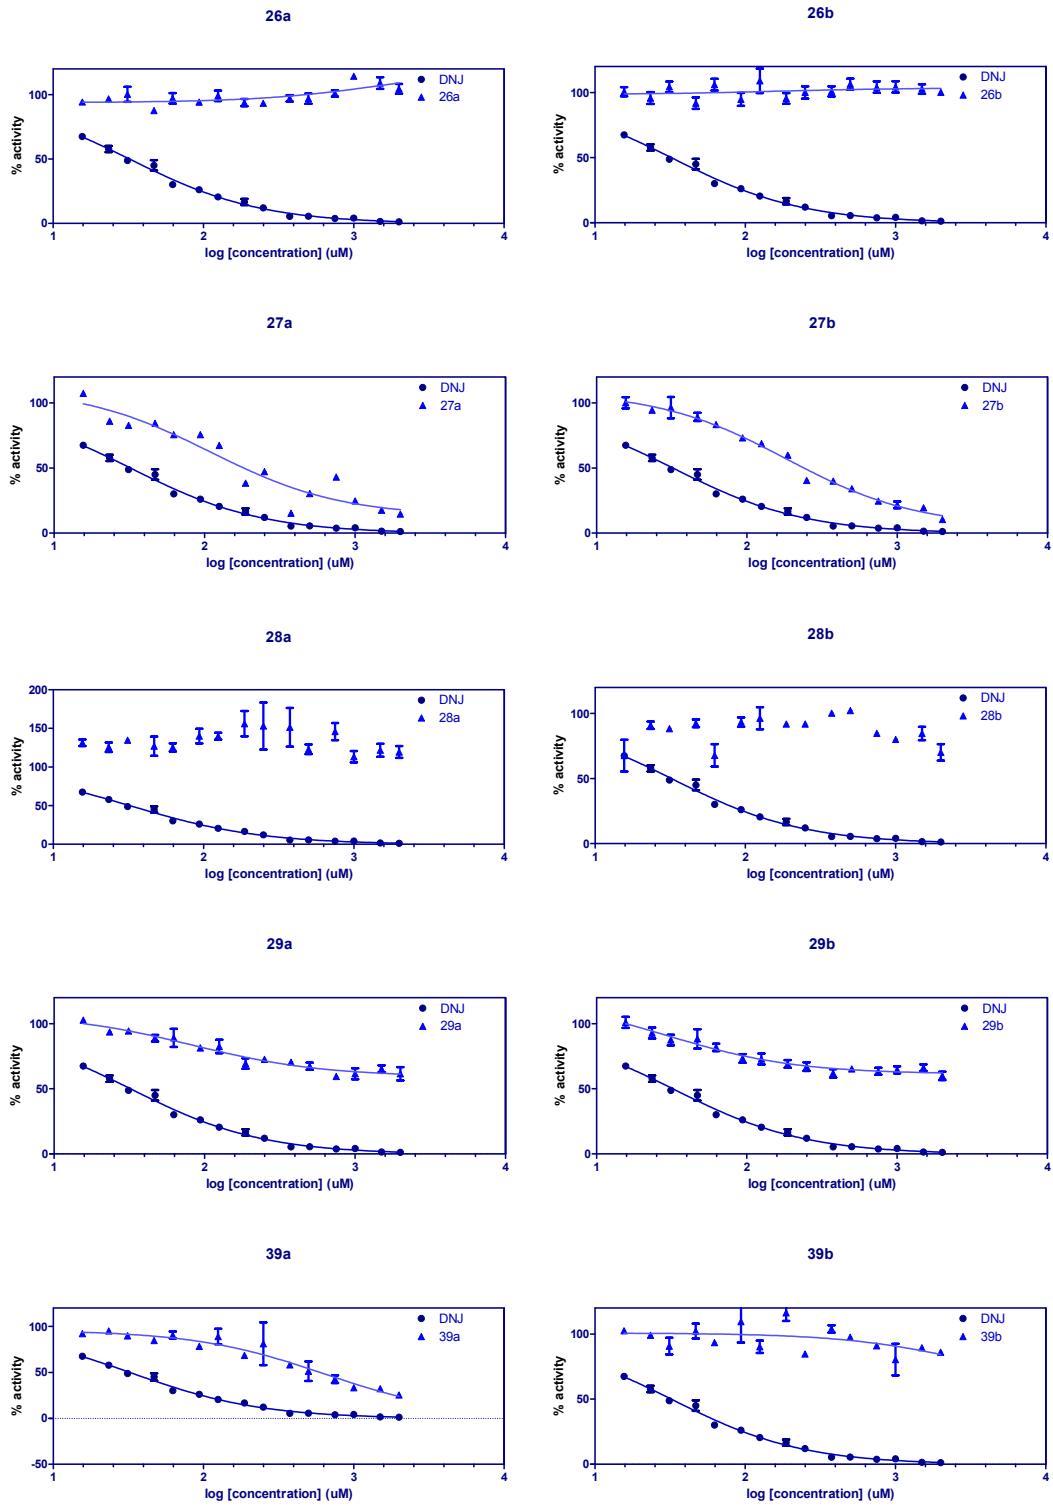

40a

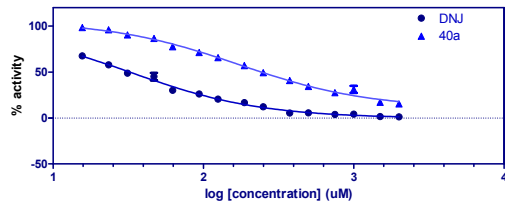

40b

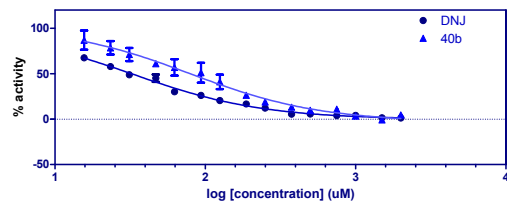

41a

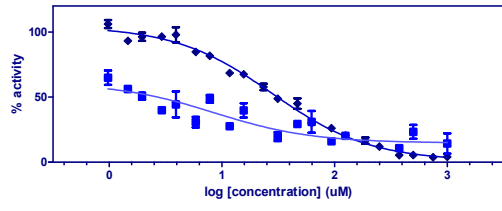

41b

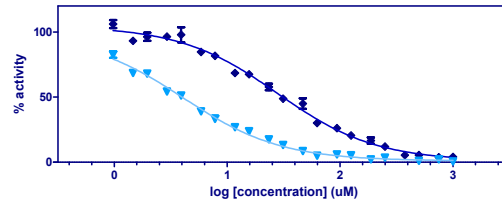

Supplement: pharmaceuticals-12-00108-s001.pdf [file pharmaceuticals-12-00108-s001.pdf]
